# Supplementary material for: Cnidarian hair cell development illuminates an ancient role for the class IV POU transcription factor in defining mechanoreceptor identity
Source: eLife. 2021 Dec 23;10:e74336. doi: 10.7554/eLife.74336 (PMC8846589; doi:10.7554/eLife.74336)
Supplement: Supplementary file 1. [file elife-74336-supp1.xlsx]

## Sheet: Sheet 1 - genes_no_differential
genes_no_differentially_expressed_with_peaks_in_annotated_region
seqnames	gene_id	position_of_POU_mark	start	end	JGI_ID
scaffold_1	NVE51	gene_body	604958	622626	79255
scaffold_1	NVE90	gene_body	1016536	1030073	No data
scaffold_1	NVE154	gene_body	1778206	1817374	78932
scaffold_1	NVE206	gene_body	2545857	2599385	79239
scaffold_1	NVE218	gene_body	2754918	2770885	237806
scaffold_1	NVE222	gene_body	2789346	2798396	79092
scaffold_1	NVE231	gene_body	2863456	2876259	78997
scaffold_1	NVE252	gene_body	3119079	3128493	237832
scaffold_2	NVE8045	gene_body	549777	582195	79680
scaffold_2	NVE8086	gene_body	1044818	1058522	157977
scaffold_2	NVE8172	gene_body	1975860	1996508	79673
scaffold_2	NVE8192	gene_body	2139078	2149780	177334
scaffold_2	NVE8194	gene_body	2152319	2162147	79617
scaffold_2	NVE8200	gene_body	2244962	2248246	No data
scaffold_2	NVE8199	gene_body	2240126	2259026	196609
scaffold_2	NVE8214	gene_body	2375483	2376487	No data
scaffold_2	NVE8230	gene_body	2476373	2485655	177378
scaffold_2	NVE8232	gene_body	2496943	2501847	196642
scaffold_3	NVE12839	gene_body	204851	218789	80839
scaffold_3	NVE12841	gene_body	228588	252880	158170
scaffold_3	NVE12843	gene_body	257287	279340	158178
scaffold_3	NVE12925	gene_body	1170473	1185434	73471
scaffold_3	NVE12938	gene_body	1431664	1477828	196807
scaffold_3	NVE12992	gene_body	2065192	2168578	80686
scaffold_3	NVE12994	gene_body	2184882	2205264	177626
scaffold_3	NVE13039	gene_body	2706264	2718055	177691
scaffold_3	NVE13045	gene_body	2808585	2819253	No data
scaffold_4	NVE16286	gene_body	41999	67765	238136
scaffold_4	NVE16303	gene_body	275207	281063	81344
scaffold_4	NVE16410	gene_body	1365940	1375514	227987
scaffold_4	NVE16422	gene_body	1444738	1461736	158601
scaffold_4	NVE16481	gene_body	2078671	2106655	81294
scaffold_4	NVE16500	gene_body	2316390	2351914	No data
scaffold_4	NVE16507	gene_body	2410851	2467039	238279
scaffold_5	NVE18890	gene_body	179971	210858	238305
scaffold_5	NVE18898	gene_body	288774	353386	82427
scaffold_5	NVE18972	gene_body	985352	994846	238353
scaffold_5	NVE18975	gene_body	1016752	1084980	82227
scaffold_5	NVE19112	gene_body	2283997	2305934	82036
scaffold_5	NVE19142	gene_body	2570488	2600109	65584
scaffold_6	NVE20912	gene_body	302309	319633	159012
scaffold_6	NVE20959	gene_body	790115	839618	159083
scaffold_6	NVE21016	gene_body	1451007	1459461	178404
scaffold_6	NVE21059	gene_body	1881037	1904781	30364
scaffold_6	NVE21077	gene_body	2161813	2174327	82493
scaffold_7	NVE22452	gene_body	1090018	1098302	No data
scaffold_7	NVE22465	gene_body	1240079	1246757	83199
scaffold_7	NVE22509	gene_body	1642408	1649176	83566
scaffold_7	NVE22526	gene_body	1771178	1807075	83376
scaffold_7	NVE22529	gene_body	1840057	1852415	178649
scaffold_9	NVE25219	gene_body	333761	449625	60642
scaffold_9	NVE25226	gene_body	507737	523467	238858
scaffold_9	NVE25269	gene_body	938110	956779	84454
scaffold_9	NVE25334	gene_body	1780775	1824120	84597
scaffold_10	NVE294	gene_body	328905	334988	238939
scaffold_10	NVE306	gene_body	557177	576879	159793
scaffold_10	NVE381	gene_body	1515986	1643558	84990
scaffold_10	NVE386	gene_body	1691413	1703967	30195
scaffold_10	NVE401	gene_body	1914051	1945538	159852
scaffold_11	NVE1225	gene_body	253842	278926	239017
scaffold_11	NVE1288	gene_body	1015549	1040554	159961
scaffold_11	NVE1293	gene_body	1083630	1093378	85640
scaffold_11	NVE1320	gene_body	1309868	1329706	239067
scaffold_12	NVE2097	gene_body	469374	483852	179376
scaffold_12	NVE2099	gene_body	485563	506791	85870
scaffold_12	NVE2100	gene_body	507623	527131	85822
scaffold_12	NVE2130	gene_body	846549	867486	85851
scaffold_12	NVE2168	gene_body	1211277	1217386	85928
scaffold_13	NVE3082	gene_body	1651107	1677774	60034
scaffold_13	NVE3093	gene_body	1726085	1732574	199225
scaffold_13	NVE3092	gene_body	1724261	1740017	86632
scaffold_14	NVE3824	gene_body	532856	564655	75568
scaffold_14	NVE3846	gene_body	797750	818537	239384
scaffold_14	NVE3856	gene_body	943616	962786	239390
scaffold_14	NVE3859	gene_body	1032294	1051992	86693
scaffold_14	NVE3883	gene_body	1279958	1316792	30104
scaffold_14	NVE3900	gene_body	1476971	1507115	86728
scaffold_15	NVE4665	gene_body	544746	555144	59997
scaffold_15	NVE4691	gene_body	838743	852373	64326
scaffold_16	NVE5446	gene_body	754291	777599	87445
scaffold_17	NVE6214	gene_body	1048896	1083510	87895
scaffold_18	NVE6908	gene_body	984004	997792	88242
scaffold_18	NVE6915	gene_body	1096310	1106032	88486
scaffold_19	NVE7460	gene_body	213942	308890	200034
scaffold_19	NVE7470	gene_body	341681	374518	88690
scaffold_19	NVE7481	gene_body	503695	521839	88731
scaffold_19	NVE7498	gene_body	740137	777399	88877
scaffold_19	NVE7535	gene_body	1306500	1328488	66221
scaffold_20	NVE8262	gene_body	32793	55535	200164
scaffold_20	NVE8270	gene_body	145006	147920	239788
scaffold_20	NVE8293	gene_body	332877	356798	200196
scaffold_20	NVE8345	gene_body	837943	842864	89019
scaffold_20	NVE8362	gene_body	1029201	1047877	88954
scaffold_20	NVE8370	gene_body	1120421	1137150	161349
scaffold_21	NVE8894	gene_body	768132	783110	239897
scaffold_22	NVE9425	gene_body	338257	343795	200525
scaffold_22	NVE9477	gene_body	931820	948629	89846
scaffold_22	NVE9492	gene_body	1158796	1173090	239975
scaffold_22	NVE9502	gene_body	1298116	1308465	200609
scaffold_22	NVE9510	gene_body	1427935	1474749	89911
scaffold_23	NVE9889	gene_body	136336	161540	90246
scaffold_23	NVE9937	gene_body	785878	807922	90077
scaffold_23	NVE9951	gene_body	1045509	1070093	90006
scaffold_23	NVE9970	gene_body	1337182	1342316	200758
scaffold_23	NVE9977	gene_body	1383084	1404656	90329
scaffold_24	NVE10383	gene_body	761351	774296	200866
scaffold_24	NVE10403	gene_body	954208	964156	200880
scaffold_24	NVE10431	gene_body	1328542	1372680	200919
scaffold_25	NVE10859	gene_body	954352	963273	240153
scaffold_25	NVE10880	gene_body	1173760	1207824	90817
scaffold_25	NVE10882	gene_body	1240021	1246179	90876
scaffold_25	NVE10889	gene_body	1312167	1340354	161912
scaffold_25	NVE10895	gene_body	1423475	1439926	201060
scaffold_25	NVE10896	gene_body	1442127	1449220	236565
scaffold_25	NVE10898	gene_body	1453597	1460951	240186
scaffold_26	NVE11240	gene_body	195118	205372	240206
scaffold_26	NVE11291	gene_body	739549	751360	201150
scaffold_26	NVE11299	gene_body	801181	830484	201155
scaffold_27	NVE11696	gene_body	211	13412	162091
scaffold_27	NVE11704	gene_body	82346	95610	162096
scaffold_27	NVE11707	gene_body	116773	126425	240295
scaffold_27	NVE11734	gene_body	685512	702649	240307
scaffold_27	NVE11738	gene_body	743720	771861	91491
scaffold_27	NVE11743	gene_body	799882	846464	91657
scaffold_28	NVE12155	gene_body	960789	985303	201470
scaffold_28	NVE12164	gene_body	1047373	1090400	201477
scaffold_28	NVE12173	gene_body	1140273	1239577	240406
scaffold_29	NVE12485	gene_body	167896	185371	92285
scaffold_29	NVE12542	gene_body	1069293	1076841	92234
scaffold_30	NVE13052	gene_body	81146	103115	92306
scaffold_30	NVE13168	gene_body	1276582	1294800	232231
scaffold_31	NVE13564	gene_body	732359	754129	240570
scaffold_32	NVE13858	gene_body	186431	214521	93222
scaffold_32	NVE13890	gene_body	518286	543027	93134
scaffold_32	NVE13891	gene_body	543666	552230	202038
scaffold_32	NVE13944	gene_body	949661	977276	93074
scaffold_32	NVE13988	gene_body	1338618	1396079	240687
scaffold_33	NVE14190	gene_body	92816	122469	202173
scaffold_33	NVE14210	gene_body	297811	305356	No data
scaffold_33	NVE14231	gene_body	532667	547381	93577
scaffold_33	NVE14237	gene_body	595007	622601	202226
scaffold_33	NVE14273	gene_body	910984	960248	162805
scaffold_34	NVE14538	gene_body	211323	222384	39219
scaffold_34	NVE14553	gene_body	420280	432858	240779
scaffold_34	NVE14571	gene_body	616080	646755	ENSRNA022756584
scaffold_34	NVE14575	gene_body	649757	676575	93878
scaffold_35	NVE14928	gene_body	1085027	1116296	232297
scaffold_36	NVE15182	gene_body	448737	484519	59988
scaffold_36	NVE15195	gene_body	691326	699415	240887
scaffold_36	NVE15214	gene_body	841806	863254	45938
scaffold_37	NVE15514	gene_body	986618	992982	240964
scaffold_38	NVE15768	gene_body	15176	30170	202773
scaffold_38	NVE15779	gene_body	115951	122955	94938
scaffold_38	NVE15841	gene_body	768347	788450	202860
scaffold_39	NVE16070	gene_body	257779	295007	241067
scaffold_39	NVE16090	gene_body	568958	622422	163356
scaffold_39	NVE16139	gene_body	1181759	1183837	No data
scaffold_39	NVE16138	gene_body	1177166	1188072	203024
scaffold_41	NVE16829	gene_body	442966	448715	No data
scaffold_41	NVE16837	gene_body	575529	602713	241186
scaffold_41	NVE16862	gene_body	974756	1017409	232363
scaffold_41	NVE16870	gene_body	1043385	1056370	70520
scaffold_42	NVE17099	gene_body	701093	748240	203353
scaffold_42	NVE17107	gene_body	850901	861863	203371
scaffold_42	NVE17108	gene_body	865980	896148	96243
scaffold_43	NVE17335	gene_body	317809	332707	96465
scaffold_43	NVE17336	gene_body	338987	344097	No data
scaffold_43	NVE17337	gene_body	353051	373209	96403
scaffold_43	NVE17373	gene_body	755791	772715	21340
scaffold_43	NVE17400	gene_body	1057403	1066941	96464
scaffold_43	NVE17409	gene_body	1154846	1164661	34324
scaffold_44	NVE17570	gene_body	8386	94847	96749
scaffold_44	NVE17579	gene_body	142806	155750	163820
scaffold_44	NVE17685	gene_body	1022180	1046554	174
scaffold_44	NVE17698	gene_body	1154068	1166905	96973
scaffold_45	NVE17813	gene_body	30327	44245	163941
scaffold_45	NVE17861	gene_body	658502	675042	97084
scaffold_46	NVE18026	gene_body	157156	168100	97511
scaffold_46	NVE18037	gene_body	287838	310600	71964
scaffold_46	NVE18051	gene_body	405159	442278	164057
scaffold_46	NVE18092	gene_body	835765	850123	97664
scaffold_46	NVE18100	gene_body	898456	911310	183341
scaffold_47	NVE18283	gene_body	342428	357029	97785
scaffold_47	NVE18323	gene_body	978822	984796	204045
scaffold_48	NVE18474	gene_body	80296	108560	98014
scaffold_49	NVE18696	gene_body	250131	275410	98367
scaffold_50	NVE19225	gene_body	992202	1003654	No data
scaffold_50	NVE19227	gene_body	1013823	1022281	98484
scaffold_51	NVE19367	gene_body	424915	432030	241767
scaffold_52	NVE19514	gene_body	79507	99585	99119
scaffold_52	NVE19531	gene_body	267287	290050	99263
scaffold_52	NVE19592	gene_body	864701	898155	241853
scaffold_52	NVE19611	gene_body	1082563	1099534	99284
scaffold_53	NVE19823	gene_body	1024412	1047219	99499
scaffold_54	NVE19939	gene_body	395156	418516	241960
scaffold_54	NVE19942	gene_body	438596	473540	99757
scaffold_54	NVE19966	gene_body	755672	767210	23923
scaffold_55	NVE20107	gene_body	285319	301487	242002
scaffold_55	NVE20172	gene_body	771383	790897	100030
scaffold_56	NVE20276	gene_body	18096	34416	205039
scaffold_56	NVE20291	gene_body	198020	214194	100328
scaffold_56	NVE20300	gene_body	356825	375032	242063
scaffold_56	NVE20310	gene_body	460021	473039	229139
scaffold_56	NVE20323	gene_body	653398	717532	60046
scaffold_57	NVE20431	gene_body	48246	54610	No data
scaffold_57	NVE20433	gene_body	93656	98894	No data
scaffold_58	NVE20674	gene_body	902517	921359	205359
scaffold_59	NVE20743	gene_body	49817	72535	25059
scaffold_59	NVE20768	gene_body	309066	322764	232575
scaffold_59	NVE20784	gene_body	579327	601521	205426
scaffold_60	NVE21107	gene_body	90927	133915	205490
scaffold_60	NVE21115	gene_body	199198	201342	26496
scaffold_60	NVE21114	gene_body	198507	215054	242264
scaffold_60	NVE21124	gene_body	434139	452226	184640
scaffold_60	NVE21125	gene_body	465348	490196	33715
scaffold_60	NVE21134	gene_body	584826	594792	242271
scaffold_61	NVE21238	gene_body	234711	253145	101677
scaffold_61	NVE21262	gene_body	495822	515731	27496
scaffold_63	NVE21517	gene_body	236225	254891	242416
scaffold_63	NVE21561	gene_body	837749	934527	102137
scaffold_64	NVE21645	gene_body	813605	824875	165768
scaffold_65	NVE21726	gene_body	111279	129285	26737
scaffold_65	NVE21757	gene_body	456904	494895	242500
scaffold_65	NVE21758	gene_body	507344	524213	31519
scaffold_66	NVE21893	gene_body	625944	663182	242549
scaffold_66	NVE21903	gene_body	730307	780568	20072
scaffold_66	NVE21916	gene_body	871985	890036	102958
scaffold_67	NVE21983	gene_body	143407	171055	20067
scaffold_67	NVE22067	gene_body	957918	969132	185277
scaffold_68	NVE22121	gene_body	140286	157965	No data
scaffold_68	NVE22150	gene_body	616504	665842	206329
scaffold_68	NVE22173	gene_body	924970	948498	58781
scaffold_70	NVE22596	gene_body	493484	509575	44401
scaffold_70	NVE22601	gene_body	587785	622783	166198
scaffold_71	NVE22701	gene_body	171847	192065	104138
scaffold_71	NVE22764	gene_body	855332	882530	185528
scaffold_71	NVE22769	gene_body	926595	931410	No data
scaffold_73	NVE22995	gene_body	342898	357092	242815
scaffold_73	NVE23047	gene_body	840243	861637	242846
scaffold_73	NVE23055	gene_body	922773	937187	229388
scaffold_74	NVE23165	gene_body	403682	413744	166469
scaffold_75	NVE23315	gene_body	382416	395720	27312
scaffold_75	NVE23326	gene_body	530652	539092	No data
scaffold_76	NVE23421	gene_body	151667	157595	242962
scaffold_76	NVE23450	gene_body	589873	619221	242978
scaffold_76	NVE23473	gene_body	844425	877061	105339
scaffold_78	NVE23664	gene_body	87236	157840	52816
scaffold_78	NVE23688	gene_body	434064	445132	207240
scaffold_81	NVE24284	gene_body	349856	367110	No data
scaffold_81	NVE24298	gene_body	543967	571731	106419
scaffold_82	NVE24421	gene_body	725264	755062	106616
scaffold_84	NVE24596	gene_body	149767	164805	73945
scaffold_84	NVE24597	gene_body	179211	202743	106996
scaffold_84	NVE24608	gene_body	345752	363109	229539
scaffold_85	NVE24696	gene_body	106467	117515	107214
scaffold_85	NVE24727	gene_body	470070	488303	207870
scaffold_85	NVE24728	gene_body	490970	544534	107236
scaffold_85	NVE24737	gene_body	589634	598790	167304
scaffold_85	NVE24744	gene_body	652265	704283	20288
scaffold_85	NVE24750	gene_body	752431	778409	243339
scaffold_86	NVE24810	gene_body	306395	438507	107451
scaffold_86	NVE24839	gene_body	786377	798295	207968
scaffold_87	NVE24872	gene_body	26641	85535	207976
scaffold_87	NVE24877	gene_body	148274	188282	107738
scaffold_87	NVE24879	gene_body	188413	210447	167381
scaffold_87	NVE24918	gene_body	781408	805412	107698
scaffold_88	NVE24999	gene_body	578622	586939	229595
scaffold_89	NVE25084	gene_body	262156	266591	186754
scaffold_90	NVE25383	gene_body	411910	425808	208267
scaffold_90	NVE25388	gene_body	499977	554945	73709
scaffold_90	NVE25401	gene_body	759168	797649	59253
scaffold_91	NVE25493	gene_body	674784	700777	108631
scaffold_91	NVE25498	gene_body	777771	796190	208381
scaffold_93	NVE25683	gene_body	411372	428030	20862
scaffold_93	NVE25690	gene_body	522507	540816	167837
scaffold_94	NVE25755	gene_body	87716	133400	208586
scaffold_94	NVE25767	gene_body	241232	251000	109337
scaffold_95	NVE25865	gene_body	100556	139287	109595
scaffold_95	NVE25888	gene_body	423272	445980	109661
scaffold_96	NVE25967	gene_body	755146	771309	243715
scaffold_97	NVE26007	gene_body	345948	372146	243726
scaffold_98	NVE26082	gene_body	293927	317031	110002
scaffold_98	NVE26106	gene_body	584850	591909	52380
scaffold_99	NVE26187	gene_body	443619	457497	208963
scaffold_99	NVE26194	gene_body	520452	534516	208969
scaffold_100	NVE438	gene_body	202455	246351	232919
scaffold_100	NVE470	gene_body	570856	651541	209051
scaffold_102	NVE602	gene_body	99096	123430	243917
scaffold_102	NVE610	gene_body	182375	203161	235180
scaffold_102	NVE638	gene_body	504476	513140	110875
scaffold_103	NVE702	gene_body	169605	194414	232941
scaffold_103	NVE717	gene_body	391358	397282	235187
scaffold_103	NVE735	gene_body	571759	577731	No data
scaffold_104	NVE830	gene_body	614326	630194	209348
scaffold_105	NVE900	gene_body	634951	652637	111441
scaffold_106	NVE928	gene_body	18807	27025	111552
scaffold_106	NVE990	gene_body	694993	713731	No data
scaffold_107	NVE1034	gene_body	347976	369563	111813
scaffold_108	NVE1097	gene_body	453796	471364	209600
scaffold_109	NVE1157	gene_body	336704	363418	244104
scaffold_109	NVE1178	gene_body	598285	627343	168629
scaffold_110	NVE1381	gene_body	9196	17140	209688
scaffold_110	NVE1392	gene_body	267830	298434	209704
scaffold_110	NVE1420	gene_body	605414	650942	112320
scaffold_111	NVE1444	gene_body	20853	31815	227023
scaffold_112	NVE1530	gene_body	153812	158695	25951
scaffold_112	NVE1560	gene_body	484599	505929	1957
scaffold_113	NVE1601	gene_body	247849	301343	112698
scaffold_113	NVE1612	gene_body	461139	532719	212
scaffold_114	NVE1650	gene_body	143978	158125	244223
scaffold_114	NVE1653	gene_body	201196	222853	112845
scaffold_114	NVE1656	gene_body	254516	263850	244226
scaffold_114	NVE1679	gene_body	515830	526352	57796
scaffold_115	NVE1747	gene_body	569343	601892	244257
scaffold_116	NVE1780	gene_body	282743	303386	235248
scaffold_118	NVE1937	gene_body	489055	494327	113472
scaffold_118	NVE1955	gene_body	646775	659098	24995
scaffold_119	NVE1980	gene_body	127068	156505	70288
scaffold_119	NVE2016	gene_body	424353	451967	113598
scaffold_120	NVE2278	gene_body	290015	301083	169128
scaffold_121	NVE2322	gene_body	185084	197162	113892
scaffold_121	NVE2340	gene_body	497043	510911	22567
scaffold_122	NVE2381	gene_body	288155	315221	188423
scaffold_124	NVE2468	gene_body	7418	53445	114224
scaffold_124	NVE2483	gene_body	163155	175475	No data
scaffold_124	NVE2512	gene_body	547994	567085	114311
scaffold_126	NVE2629	gene_body	414976	433583	114572
scaffold_126	NVE2639	gene_body	510908	523256	210732
scaffold_128	NVE2788	gene_body	487888	513749	31564
scaffold_129	NVE2855	gene_body	377713	403421	230001
scaffold_130	NVE3117	gene_body	155913	246927	50296
scaffold_131	NVE3169	gene_body	50426	75730	115361
scaffold_131	NVE3210	gene_body	432530	436061	211050
scaffold_132	NVE3268	gene_body	276701	295423	169723
scaffold_132	NVE3291	gene_body	469117	481533	169753
scaffold_132	NVE3300	gene_body	567881	606185	115565
scaffold_133	NVE3344	gene_body	249579	261783	211165
scaffold_133	NVE3357	gene_body	383657	396945	244785
scaffold_134	NVE3413	gene_body	363100	373974	211245
scaffold_135	NVE3439	gene_body	29526	44516	189070
scaffold_135	NVE3449	gene_body	127807	144615	211276
scaffold_135	NVE3456	gene_body	233487	246155	25981
scaffold_135	NVE3472	gene_body	397886	474326	211304
scaffold_136	NVE3514	gene_body	125875	150025	116118
scaffold_138	NVE3646	gene_body	412379	428843	230093
scaffold_139	NVE3702	gene_body	82106	94621	189255
scaffold_139	NVE3703	gene_body	95086	107730	17158
scaffold_139	NVE3725	gene_body	300155	329566	116629
scaffold_139	NVE3735	gene_body	382213	386112	116534
scaffold_140	NVE3941	gene_body	117316	122979	237220
scaffold_141	NVE4004	gene_body	10377	88045	116722
scaffold_141	NVE4031	gene_body	384745	393725	211643
scaffold_142	NVE4114	gene_body	363459	402172	245025
scaffold_144	NVE4232	gene_body	269591	297221	117129
scaffold_144	NVE4236	gene_body	356226	368042	237233
scaffold_145	NVE4284	gene_body	53643	69885	245085
scaffold_146	NVE4372	gene_body	352820	375204	48849
scaffold_146	NVE4376	gene_body	406401	463885	170394
scaffold_147	NVE4412	gene_body	43467	80535	117504
scaffold_147	NVE4423	gene_body	193562	241520	117565
scaffold_151	NVE4860	gene_body	451477	505608	20472
scaffold_152	NVE4882	gene_body	58916	91580	118215
scaffold_152	NVE4883	gene_body	96796	121190	212236
scaffold_152	NVE4884	gene_body	121346	164758	212236
scaffold_152	NVE4886	gene_body	167567	178815	118271
scaffold_154	NVE5006	gene_body	78766	114090	118527
scaffold_154	NVE5031	gene_body	527192	532200	No data
scaffold_155	NVE5062	gene_body	176510	233984	70071
scaffold_155	NVE5064	gene_body	196183	213391	21978
scaffold_155	NVE5079	gene_body	479170	485369	245329
scaffold_155	NVE5080	gene_body	490120	500434	57553
scaffold_156	NVE5106	gene_body	30937	35955	118856
scaffold_156	NVE5138	gene_body	257038	309926	118813
scaffold_158	NVE5297	gene_body	440494	475882	170847
scaffold_159	NVE5347	gene_body	304763	365878	20005
scaffold_159	NVE5349	gene_body	389519	404974	29235
scaffold_159	NVE5353	gene_body	435219	446147	212635
scaffold_159	NVE5355	gene_body	452799	461166	212635
scaffold_161	NVE5617	gene_body	280350	331197	74567
scaffold_162	NVE5648	gene_body	86350	119125	25109
scaffold_162	NVE5654	gene_body	175801	206001	212749
scaffold_162	NVE5662	gene_body	269982	279516	245479
scaffold_162	NVE5673	gene_body	443527	462125	170950
scaffold_163	NVE5729	gene_body	505526	512591	No data
scaffold_164	NVE5772	gene_body	60197	73935	212847
scaffold_164	NVE5796	gene_body	340163	384972	233257
scaffold_164	NVE5800	gene_body	492008	502162	245522
scaffold_166	NVE5912	gene_body	503932	516368	212981
scaffold_167	NVE5938	gene_body	143192	164975	227246
scaffold_169	NVE6069	gene_body	293684	350232	26345
scaffold_170	NVE6273	gene_body	162356	190086	13267
scaffold_171	NVE6313	gene_body	108586	127749	245645
scaffold_171	NVE6338	gene_body	410938	438556	30158
scaffold_172	NVE6383	gene_body	184410	203098	21807
scaffold_173	NVE6450	gene_body	185465	198763	171313
scaffold_174	NVE6529	gene_body	445800	457714	120822
scaffold_175	NVE6556	gene_body	120086	124350	1490
scaffold_175	NVE6557	gene_body	126753	151655	213382
scaffold_175	NVE6569	gene_body	307826	329297	40134
scaffold_175	NVE6582	gene_body	423987	451263	10129
scaffold_178	NVE6738	gene_body	172606	190340	No data
scaffold_180	NVE6991	gene_body	331341	336260	No data
scaffold_182	NVE7053	gene_body	954	66075	121760
scaffold_182	NVE7056	gene_body	82577	89895	41253
scaffold_185	NVE7205	gene_body	152997	172360	171664
scaffold_185	NVE7213	gene_body	265258	275036	190891
scaffold_185	NVE7225	gene_body	355001	379254	17945
scaffold_186	NVE7247	gene_body	31937	53475	235624
scaffold_186	NVE7255	gene_body	160060	193883	245940
scaffold_186	NVE7275	gene_body	379690	416138	122088
scaffold_188	NVE7348	gene_body	100116	146180	45
scaffold_189	NVE7396	gene_body	22506	52424	122321
scaffold_190	NVE7564	gene_body	152774	179015	71070
scaffold_191	NVE7616	gene_body	216897	241540	214068
scaffold_192	NVE7659	gene_body	324960	331254	No data
scaffold_193	NVE7690	gene_body	157016	187120	214146
scaffold_195	NVE7759	gene_body	48832	88295	214225
scaffold_196	NVE7804	gene_body	8546	13429	246088
scaffold_197	NVE7848	gene_body	1732	17425	214316
scaffold_197	NVE7877	gene_body	337664	344141	123184
scaffold_198	NVE7894	gene_body	39707	59265	No data
scaffold_199	NVE7942	gene_body	57326	69950	123326
scaffold_199	NVE7943	gene_body	79207	95905	246132
scaffold_203	NVE8563	gene_body	261026	279570	246204
scaffold_203	NVE8564	gene_body	279676	306648	10039
scaffold_204	NVE8597	gene_body	223477	245119	172156
scaffold_208	NVE8733	gene_body	202775	205899	191466
scaffold_214	NVE9139	gene_body	28856	91020	246369
scaffold_214	NVE9141	gene_body	93856	103120	246369
scaffold_214	NVE9142	gene_body	95127	100275	246369
scaffold_216	NVE9221	gene_body	75486	79950	237388
scaffold_216	NVE9242	gene_body	300966	331966	11039
scaffold_217	NVE9284	gene_body	242843	251798	172583
scaffold_219	NVE9379	gene_body	351052	369700	125484
scaffold_220	NVE9547	gene_body	252866	293750	50018
scaffold_221	NVE9587	gene_body	303915	310922	246502
scaffold_223	NVE9634	gene_body	67076	84160	215272
scaffold_226	NVE9713	gene_body	72446	109710	215357
scaffold_226	NVE9721	gene_body	139756	181770	10414
scaffold_226	NVE9740	gene_body	358519	368014	No data
scaffold_227	NVE9757	gene_body	87346	97524	246566
scaffold_227	NVE9777	gene_body	293556	309450	126053
scaffold_229	NVE9819	gene_body	981	4605	215457
scaffold_229	NVE9832	gene_body	104516	127150	235773
scaffold_230	NVE10016	gene_body	152836	170260	11117
scaffold_231	NVE10044	gene_body	10907	68965	40000
scaffold_231	NVE10045	gene_body	69027	93215	215562
scaffold_232	NVE10086	gene_body	174209	197331	126459
scaffold_232	NVE10097	gene_body	267522	293116	126489
scaffold_235	NVE10179	gene_body	153671	185035	215690
scaffold_235	NVE10182	gene_body	206997	247970	215693
scaffold_236	NVE10200	gene_body	64157	75815	173120
scaffold_236	NVE10203	gene_body	107417	143335	50013
scaffold_237	NVE10249	gene_body	237315	259267	127372
scaffold_239	NVE10272	gene_body	18017	40705	43898
scaffold_240	NVE10460	gene_body	290574	307059	127574
scaffold_243	NVE10558	gene_body	54549	74915	No data
scaffold_243	NVE10580	gene_body	275591	287049	127871
scaffold_245	NVE10654	gene_body	324010	342910	14438
scaffold_246	NVE10676	gene_body	170697	207396	No data
scaffold_246	NVE10680	gene_body	240667	268109	No data
scaffold_247	NVE10693	gene_body	5300	34505	246845
scaffold_247	NVE10704	gene_body	118256	132947	216044
scaffold_247	NVE10714	gene_body	216043	226197	18799
scaffold_250	NVE10911	gene_body	61456	71568	No data
scaffold_254	NVE11026	gene_body	45916	62113	128742
scaffold_259	NVE11199	gene_body	177650	184547	216394
scaffold_261	NVE11419	gene_body	151277	158985	246999
scaffold_262	NVE11448	gene_body	69416	90390	233529
scaffold_266	NVE11568	gene_body	35376	49715	17187
scaffold_266	NVE11584	gene_body	214820	234027	16432
scaffold_267	NVE11603	gene_body	125666	160616	10117
scaffold_267	NVE11614	gene_body	296270	310268	No data
scaffold_268	NVE11655	gene_body	298727	321375	129645
scaffold_269	NVE11669	gene_body	64126	108826	129798
scaffold_270	NVE11832	gene_body	134486	145570	No data
scaffold_270	NVE11835	gene_body	166297	176035	129882
scaffold_273	NVE11916	gene_body	164966	218579	216821
scaffold_279	NVE12060	gene_body	55696	65047	130399
scaffold_281	NVE12225	gene_body	21317	57835	247234
scaffold_283	NVE12290	gene_body	148945	196823	217091
scaffold_284	NVE12313	gene_body	227285	295585	12085
scaffold_285	NVE12329	gene_body	95886	111640	48686
scaffold_286	NVE12353	gene_body	223506	250760	45008
scaffold_287	NVE12377	gene_body	210802	252270	130907
scaffold_292	NVE12627	gene_body	147532	195038	10204
scaffold_295	NVE12707	gene_body	146906	157165	247365
scaffold_296	NVE12719	gene_body	1	25765	131497
scaffold_297	NVE12771	gene_body	243694	252981	217449
scaffold_299	NVE12802	gene_body	116363	136505	131735
scaffold_300	NVE13208	gene_body	127837	145905	131788
scaffold_302	NVE13283	gene_body	251966	268990	71242
scaffold_304	NVE13337	gene_body	44517	56675	217601
scaffold_304	NVE13348	gene_body	156611	200307	247454
scaffold_304	NVE13352	gene_body	223719	230517	132075
scaffold_304	NVE13354	gene_body	240058	253903	14522
scaffold_305	NVE13372	gene_body	178024	187745	217635
scaffold_305	NVE13373	gene_body	190769	200673	233609
scaffold_306	NVE13403	gene_body	248090	271329	217668
scaffold_310	NVE13626	gene_body	190675	213799	132647
scaffold_314	NVE13708	gene_body	59377	73025	31928
scaffold_314	NVE13722	gene_body	182395	219359	70217
scaffold_315	NVE13748	gene_body	198584	210567	133070
scaffold_316	NVE13758	gene_body	111477	114445	76760
scaffold_316	NVE13761	gene_body	156857	162595	18302
scaffold_318	NVE13804	gene_body	129426	138837	193880
scaffold_321	NVE14013	gene_body	48897	79235	133671
scaffold_322	NVE14024	gene_body	22893	90375	217995
scaffold_323	NVE14050	gene_body	111838	151025	133886
scaffold_327	NVE14123	gene_body	156211	198980	134000
scaffold_328	NVE14132	gene_body	7404	59965	218078
scaffold_328	NVE14137	gene_body	154471	207529	134082
scaffold_329	NVE14164	gene_body	136827	175675	134122
scaffold_329	NVE14165	gene_body	176558	180926	134122
scaffold_329	NVE14167	gene_body	190096	212304	134122
scaffold_332	NVE14346	gene_body	139	24115	247647
scaffold_332	NVE14361	gene_body	144749	182215	218147
scaffold_334	NVE14391	gene_body	57856	106960	218179
scaffold_340	NVE14625	gene_body	72151	90075	218298
scaffold_344	NVE14700	gene_body	102717	147365	134716
scaffold_345	NVE14715	gene_body	68446	103610	134786
scaffold_346	NVE14729	gene_body	42086	54445	218392
scaffold_346	NVE14741	gene_body	155426	161290	247740
scaffold_346	NVE14743	gene_body	169876	171622	No data
scaffold_349	NVE14827	gene_body	186480	196270	41031
scaffold_351	NVE14965	gene_body	21117	37105	218492
scaffold_351	NVE14972	gene_body	95864	110615	135082
scaffold_352	NVE15008	gene_body	157562	203265	65111
scaffold_353	NVE15025	gene_body	92346	102580	218543
scaffold_354	NVE15057	gene_body	134556	151460	76738
scaffold_355	NVE15076	gene_body	123749	193035	40084
scaffold_357	NVE15105	gene_body	121797	171215	50047
scaffold_360	NVE15256	gene_body	141626	161920	41366
scaffold_364	NVE15332	gene_body	98711	112905	218759
scaffold_364	NVE15334	gene_body	119056	140710	135889
scaffold_364	NVE15338	gene_body	155446	181400	10792
scaffold_365	NVE15350	gene_body	60846	103260	135929
scaffold_367	NVE15383	gene_body	81518	89185	136007
scaffold_367	NVE15387	gene_body	122976	157437	194382
scaffold_373	NVE15617	gene_body	143576	165020	247892
scaffold_374	NVE15633	gene_body	42206	47500	218890
scaffold_377	NVE15702	gene_body	15406	24058	55146
scaffold_377	NVE15703	gene_body	24698	60145	136552
scaffold_377	NVE15709	gene_body	132970	151105	136532
scaffold_383	NVE15949	gene_body	87686	132380	136781
scaffold_384	NVE15960	gene_body	37047	52605	136836
scaffold_388	NVE16026	gene_body	95840	136035	194611
scaffold_390	NVE16157	gene_body	89646	103354	137140
scaffold_397	NVE16255	gene_body	102706	117608	219307
scaffold_418	NVE17005	gene_body	49790	61535	219525
scaffold_420	NVE17161	gene_body	141616	150795	40552
scaffold_422	NVE17197	gene_body	145862	162375	219591
scaffold_427	NVE17261	gene_body	10616	18410	No data
scaffold_428	NVE17277	gene_body	8836	50260	219665
scaffold_429	NVE17297	gene_body	10862	38685	219682
scaffold_432	NVE17465	gene_body	123167	131345	No data
scaffold_438	NVE17536	gene_body	93092	122395	138635
scaffold_447	NVE17778	gene_body	19316	25462	219847
scaffold_449	NVE17802	gene_body	72506	137555	2016
scaffold_454	NVE17942	gene_body	7566	24785	5453
scaffold_459	NVE17999	gene_body	27926	76526	248208
scaffold_464	NVE18161	gene_body	80266	101695	219985
scaffold_465	NVE18167	gene_body	7217	19425	139188
scaffold_469	NVE18232	gene_body	107857	114295	139276
scaffold_470	NVE18361	gene_body	45856	94110	220056
scaffold_471	NVE18372	gene_body	16196	73130	139391
scaffold_479	NVE18447	gene_body	3359	18013	40200
scaffold_502	NVE19258	gene_body	28997	67765	140069
scaffold_504	NVE19281	gene_body	73356	78664	66497
scaffold_508	NVE19319	gene_body	4936	24680	227643
scaffold_508	NVE19326	gene_body	65006	90333	220376
scaffold_521	NVE19634	gene_body	91936	96773	220433
scaffold_525	NVE19664	gene_body	22	1550	140463
scaffold_527	NVE19697	gene_body	60046	87906	220484
scaffold_533	NVE19857	gene_body	22406	43380	4782
scaffold_543	NVE20018	gene_body	41788	94275	248399
scaffold_548	NVE20067	gene_body	37061	52975	220626
scaffold_552	NVE20219	gene_body	50227	58475	No data
scaffold_569	NVE20421	gene_body	62686	84540	5496
scaffold_591	NVE20824	gene_body	3697	39125	176183
scaffold_596	NVE20878	gene_body	29056	36460	No data
scaffold_597	NVE20880	gene_body	17017	35065	141705
scaffold_600	NVE21168	gene_body	2986	25430	195427
scaffold_622	NVE21472	gene_body	44626	70861	248535
scaffold_650	NVE21802	gene_body	565	36170	67783
scaffold_688	NVE22215	gene_body	1246	31800	195521
scaffold_702	NVE22639	gene_body	6286	21450	221237
scaffold_705	NVE22650	gene_body	2486	11175	221241
scaffold_715	NVE22805	gene_body	19404	36955	No data
scaffold_828	NVE24466	gene_body	5262	13845	No data
scaffold_832	NVE24559	gene_body	36876	43429	No data
scaffold_848	NVE24681	gene_body	21917	35185	3989
scaffold_1039	NVE776	gene_body	19396	23370	No data
scaffold_1065	NVE1006	gene_body	20551	32625	144518
scaffold_1347	NVE3432	gene_body	2282	25050	42016
scaffold_1400	NVE3979	gene_body	18387	29855	145330
scaffold_1796	NVE6820	gene_body	115	11805	146831
scaffold_2138	NVE9134	gene_body	1087	8145	222989
scaffold_2280	NVE9812	gene_body	2726	13225	148162
scaffold_2652	NVE11561	gene_body	279	11231	No data
scaffold_3320	NVE14364	gene_body	5746	7190	2155
scaffold_3785	NVE15739	gene_body	367	9025	224049
scaffold_3785	NVE15740	gene_body	2811	8935	No data
scaffold_4203	NVE17166	gene_body	1281	5865	64449
scaffold_4370	NVE17525	gene_body	732	7115	151715
scaffold_5220	NVE19646	gene_body	217	7045	No data
scaffold_6398	NVE21594	gene_body	196	3156	153614
scaffold_8029	NVE24230	gene_body	537	3045	225293
scaffold_1	NVE6	gene_body	54636	66679	176880
scaffold_1	NVE12	gene_body	121347	126075	196084
scaffold_1	NVE13	gene_body	129557	137495	196085
scaffold_1	NVE19	gene_body	228840	237884	79108
scaffold_1	NVE38	gene_body	392698	400948	157664
scaffold_1	NVE43	gene_body	468560	510188	79262
scaffold_1	NVE45	gene_body	533028	546969	196123
scaffold_1	NVE47	gene_body	563528	567073	237717
scaffold_1	NVE54	gene_body	647578	651657	32913
scaffold_1	NVE59	gene_body	710898	747435	157705
scaffold_1	NVE60	gene_body	748278	770542	79192
scaffold_1	NVE62	gene_body	784245	786284	30213
scaffold_1	NVE61	gene_body	772535	790657	30213
scaffold_1	NVE66	gene_body	820311	823741	237730
scaffold_1	NVE83	gene_body	943504	947443	157742
scaffold_1	NVE88	gene_body	975464	994763	79512
scaffold_1	NVE89	gene_body	997466	1008743	60470
scaffold_1	NVE91	gene_body	1032729	1038343	63269
scaffold_1	NVE101	gene_body	1140591	1150253	31030
scaffold_1	NVE102	gene_body	1150992	1157140	237756
scaffold_1	NVE103	gene_body	1160962	1164060	231702
scaffold_1	NVE108	gene_body	1206607	1224914	78877
scaffold_1	NVE117	gene_body	1294375	1297719	71471
scaffold_1	NVE121	gene_body	1352085	1361734	73504
scaffold_1	NVE122	gene_body	1366386	1382096	79033
scaffold_1	NVE127	gene_body	1464209	1471515	79564
scaffold_1	NVE163	gene_body	1890714	1909159	79471
scaffold_1	NVE169	gene_body	2012761	2027983	30840
scaffold_1	NVE181	gene_body	2168230	2172604	196291
scaffold_1	NVE208	gene_body	2612347	2621635	237801
scaffold_1	NVE212	gene_body	2643427	2667565	79563
scaffold_1	NVE221	gene_body	2780836	2788380	79348
scaffold_1	NVE240	gene_body	2963110	2969064	237825
scaffold_2	NVE7999	gene_body	127946	137825	79785
scaffold_2	NVE8004	gene_body	169316	175660	79948
scaffold_2	NVE8012	gene_body	256709	271289	80159
scaffold_2	NVE8017	gene_body	308950	311694	237852
scaffold_2	NVE8018	gene_body	311711	324689	237852
scaffold_2	NVE8023	gene_body	356860	373914	ENSRNA022757647
scaffold_2	NVE8024	gene_body	385186	388910	33294
scaffold_2	NVE8047	gene_body	599771	615035	79911
scaffold_2	NVE8056	gene_body	746373	757023	157950
scaffold_2	NVE8058	gene_body	765845	767475	196456
scaffold_2	NVE8078	gene_body	962773	977367	79931
scaffold_2	NVE8088	gene_body	1073718	1079395	No data
scaffold_2	NVE8095	gene_body	1160030	1182029	157985
scaffold_2	NVE8103	gene_body	1277161	1298749	79682
scaffold_2	NVE8108	gene_body	1333760	1338669	237908
scaffold_2	NVE8131	gene_body	1499518	1509434	237922
scaffold_2	NVE8148	gene_body	1661863	1676795	79649
scaffold_2	NVE8164	gene_body	1893844	1904948	80152
scaffold_2	NVE8175	gene_body	2008744	2016758	80219
scaffold_2	NVE8190	gene_body	2118278	2126992	237955
scaffold_2	NVE8202	gene_body	2280000	2288005	79980
scaffold_2	NVE8203	gene_body	2288468	2292745	237962
scaffold_2	NVE8208	gene_body	2336007	2340015	30771
scaffold_2	NVE8210	gene_body	2350867	2353695	237968
scaffold_2	NVE8215	gene_body	2376549	2378097	No data
scaffold_2	NVE8226	gene_body	2434983	2444207	237976
scaffold_2	NVE8234	gene_body	2526163	2546399	237981
scaffold_2	NVE8242	gene_body	2643359	2666433	30056
scaffold_2	NVE8250	gene_body	2709519	2714432	79860
scaffold_2	NVE8253	gene_body	2737343	2741984	No data
scaffold_2	NVE8254	gene_body	2743054	2767172	79820
scaffold_2	NVE8257	gene_body	2781963	2787057	60019
scaffold_3	NVE12821	gene_body	7986	25763	237996
scaffold_3	NVE12828	gene_body	94716	121570	227907
scaffold_3	NVE12833	gene_body	159608	166555	80875
scaffold_3	NVE12840	gene_body	220401	223188	No data
scaffold_3	NVE12855	gene_body	380008	386552	1897
scaffold_3	NVE12856	gene_body	390719	402657	177453
scaffold_3	NVE12867	gene_body	505005	513177	238031
scaffold_3	NVE12878	gene_body	580074	584084	177481
scaffold_3	NVE12885	gene_body	614885	636002	196754
scaffold_3	NVE12901	gene_body	756342	763976	No data
scaffold_3	NVE12909	gene_body	873075	882074	158265
scaffold_3	NVE12911	gene_body	895975	950529	80374
scaffold_3	NVE12923	gene_body	1131936	1156624	196785
scaffold_3	NVE12930	gene_body	1259197	1348568	80370
scaffold_3	NVE12950	gene_body	1609099	1637952	227937
scaffold_3	NVE12963	gene_body	1764747	1776366	196840
scaffold_3	NVE12967	gene_body	1789168	1807626	158344
scaffold_3	NVE12988	gene_body	1977633	1987649	227950
scaffold_3	NVE12989	gene_body	1991087	1998068	238101
scaffold_3	NVE12995	gene_body	2205595	2208039	238107
scaffold_3	NVE13003	gene_body	2313065	2332781	80977
scaffold_3	NVE13029	gene_body	2605018	2616869	32586
scaffold_3	NVE13032	gene_body	2644640	2663204	30373
scaffold_3	NVE13036	gene_body	2683510	2694577	158435
scaffold_3	NVE13040	gene_body	2723085	2739353	80463
scaffold_4	NVE16287	gene_body	68536	72160	81169
scaffold_4	NVE16300	gene_body	192887	248141	238150
scaffold_4	NVE16314	gene_body	404654	416348	81376
scaffold_4	NVE16319	gene_body	435864	439738	196963
scaffold_4	NVE16328	gene_body	534008	557115	81124
scaffold_4	NVE16337	gene_body	601694	608437	238169
scaffold_4	NVE16343	gene_body	669228	678356	72088
scaffold_4	NVE16352	gene_body	757577	772497	81635
scaffold_4	NVE16360	gene_body	860949	881369	177781
scaffold_4	NVE16367	gene_body	951577	979519	238189
scaffold_4	NVE16368	gene_body	980734	988519	No data
scaffold_4	NVE16379	gene_body	1107558	1113613	81533
scaffold_4	NVE16396	gene_body	1257990	1276754	81185
scaffold_4	NVE16424	gene_body	1475328	1487516	81314
scaffold_4	NVE16456	gene_body	1755318	1758462	238249
scaffold_4	NVE16459	gene_body	1793458	1816122	81339
scaffold_4	NVE16462	gene_body	1846587	1854307	233975
scaffold_4	NVE16463	gene_body	1854940	1862175	233975
scaffold_4	NVE16466	gene_body	1886687	1900105	233976
scaffold_4	NVE16468	gene_body	1909066	1927400	60016
scaffold_4	NVE16473	gene_body	1975555	1984305	81258
scaffold_4	NVE16492	gene_body	2218350	2224264	No data
scaffold_4	NVE16496	gene_body	2269938	2277429	71378
scaffold_4	NVE16512	gene_body	2490938	2511510	64089
scaffold_4	NVE16523	gene_body	2565069	2566222	81610
scaffold_4	NVE16535	gene_body	2688022	2693768	177965
scaffold_5	NVE18879	gene_body	25837	37605	82024
scaffold_5	NVE18893	gene_body	224680	230168	61547
scaffold_5	NVE18900	gene_body	358987	371948	70174
scaffold_5	NVE18911	gene_body	464744	472670	197226
scaffold_5	NVE18913	gene_body	479784	490298	No data
scaffold_5	NVE18915	gene_body	497225	511953	197231
scaffold_5	NVE18937	gene_body	726169	734797	82371
scaffold_5	NVE18943	gene_body	771656	778657	238337
scaffold_5	NVE18961	gene_body	882973	886271	238344
scaffold_5	NVE18970	gene_body	950962	974786	30750
scaffold_5	NVE18981	gene_body	1122351	1146505	197301
scaffold_5	NVE18992	gene_body	1249122	1262080	158806
scaffold_5	NVE18995	gene_body	1272242	1282980	No data
scaffold_5	NVE19010	gene_body	1447713	1450535	82150
scaffold_5	NVE19027	gene_body	1571911	1578295	238389
scaffold_5	NVE19028	gene_body	1579962	1586400	81873
scaffold_5	NVE19039	gene_body	1641192	1643440	238391
scaffold_5	NVE19041	gene_body	1648738	1660410	82364
scaffold_5	NVE19055	gene_body	1777509	1793773	60162
scaffold_5	NVE19072	gene_body	1918986	1934117	81999
scaffold_5	NVE19092	gene_body	2114053	2119627	34342
scaffold_5	NVE19108	gene_body	2240186	2250284	67209
scaffold_5	NVE19122	gene_body	2366333	2381104	178205
scaffold_5	NVE19127	gene_body	2420350	2436044	197466
scaffold_5	NVE19147	gene_body	2635998	2641262	231845
scaffold_6	NVE20901	gene_body	184899	195248	197497
scaffold_6	NVE20914	gene_body	347688	358802	82977
scaffold_6	NVE20934	gene_body	534019	549592	159029
scaffold_6	NVE20939	gene_body	580319	583528	178285
scaffold_6	NVE20952	gene_body	706241	707924	34633
scaffold_6	NVE20985	gene_body	1103103	1115822	82979
scaffold_6	NVE20987	gene_body	1128163	1145688	238528
scaffold_6	NVE21007	gene_body	1346758	1353069	197623
scaffold_6	NVE21028	gene_body	1569627	1584403	82804
scaffold_6	NVE21035	gene_body	1616671	1620993	238555
scaffold_6	NVE21040	gene_body	1652332	1654240	238559
scaffold_6	NVE21049	gene_body	1755621	1770455	236378
scaffold_6	NVE21055	gene_body	1813207	1826841	159193
scaffold_6	NVE21060	gene_body	1905217	1911171	30364
scaffold_6	NVE21080	gene_body	2199813	2214910	83019
scaffold_7	NVE22359	gene_body	3906	22990	83325
scaffold_7	NVE22364	gene_body	68360	70755	238599
scaffold_7	NVE22365	gene_body	75316	88057	83039
scaffold_7	NVE22400	gene_body	350180	353890	231875
scaffold_7	NVE22408	gene_body	399540	423059	30362
scaffold_7	NVE22412	gene_body	440232	448019	159302
scaffold_7	NVE22421	gene_body	554179	571563	159317
scaffold_7	NVE22429	gene_body	755969	781783	83545
scaffold_7	NVE22441	gene_body	860089	861615	No data
scaffold_7	NVE22447	gene_body	916403	930357	83175
scaffold_7	NVE22453	gene_body	1100198	1110242	83506
scaffold_7	NVE22462	gene_body	1220128	1226222	238654
scaffold_7	NVE22463	gene_body	1226288	1230868	238655
scaffold_7	NVE22482	gene_body	1388326	1389790	178614
scaffold_7	NVE22481	gene_body	1366832	1393636	178614
scaffold_7	NVE22490	gene_body	1473696	1479042	197858
scaffold_7	NVE22507	gene_body	1630657	1640479	197876
scaffold_7	NVE22513	gene_body	1660257	1664031	83526
scaffold_7	NVE22517	gene_body	1707456	1725926	83090
scaffold_7	NVE22531	gene_body	1858610	1860554	No data
scaffold_7	NVE22550	gene_body	2078414	2089642	83407
scaffold_7	NVE22561	gene_body	2170572	2184476	83048
scaffold_7	NVE22580	gene_body	2303914	2334888	178700
scaffold_8	NVE23916	gene_body	78856	112450	74029
scaffold_8	NVE23919	gene_body	173655	182959	197971
scaffold_8	NVE23925	gene_body	240346	268144	83852
scaffold_8	NVE23948	gene_body	491728	498812	No data
scaffold_8	NVE23970	gene_body	712522	727069	159517
scaffold_8	NVE23978	gene_body	796040	810988	83918
scaffold_8	NVE24026	gene_body	1130138	1135972	198093
scaffold_8	NVE24054	gene_body	1322453	1337427	83746
scaffold_8	NVE24081	gene_body	1696089	1713373	198158
scaffold_8	NVE24106	gene_body	1999781	2021329	83890
scaffold_8	NVE24110	gene_body	2037137	2039724	238816
scaffold_8	NVE24127	gene_body	2198086	2204428	83774
scaffold_9	NVE25187	gene_body	19606	23325	No data
scaffold_9	NVE25199	gene_body	91817	100775	159633
scaffold_9	NVE25201	gene_body	137476	143703	198232
scaffold_9	NVE25203	gene_body	158546	166849	40487
scaffold_9	NVE25205	gene_body	175677	178395	178884
scaffold_9	NVE25230	gene_body	563198	566772	228186
scaffold_9	NVE25235	gene_body	612828	625483	84687
scaffold_9	NVE25273	gene_body	970478	983332	198315
scaffold_9	NVE25287	gene_body	1096983	1116080	198330
scaffold_9	NVE25300	gene_body	1295255	1332367	198347
scaffold_9	NVE25303	gene_body	1350288	1357162	238896
scaffold_9	NVE25313	gene_body	1462025	1467430	238903
scaffold_9	NVE25315	gene_body	1484351	1498225	84603
scaffold_9	NVE25316	gene_body	1500971	1512175	228199
scaffold_9	NVE25326	gene_body	1593107	1615901	238911
scaffold_9	NVE25348	gene_body	2019270	2033858	84363
scaffold_10	NVE261	gene_body	48737	52085	34627
scaffold_10	NVE293	gene_body	316179	321971	179027
scaffold_10	NVE295	gene_body	342489	345816	64136
scaffold_10	NVE296	gene_body	346087	377636	238942
scaffold_10	NVE304	gene_body	533130	534334	No data
scaffold_10	NVE305	gene_body	535326	551329	No data
scaffold_10	NVE312	gene_body	621740	629761	238950
scaffold_10	NVE330	gene_body	844186	846584	84834
scaffold_10	NVE329	gene_body	840733	852010	84834
scaffold_10	NVE341	gene_body	987418	988462	35668
scaffold_10	NVE351	gene_body	1120118	1129196	84932
scaffold_10	NVE352	gene_body	1129507	1144161	198525
scaffold_10	NVE359	gene_body	1259186	1286650	84767
scaffold_10	NVE362	gene_body	1324336	1330554	236430
scaffold_10	NVE363	gene_body	1342156	1361300	179073
scaffold_10	NVE382	gene_body	1646580	1675238	198556
scaffold_10	NVE392	gene_body	1754490	1758444	198562
scaffold_10	NVE391	gene_body	1745947	1770752	84958
scaffold_10	NVE407	gene_body	1987090	1995048	198576
scaffold_10	NVE410	gene_body	2007927	2013826	198576
scaffold_10	NVE417	gene_body	2084577	2094141	238998
scaffold_11	NVE1209	gene_body	116046	128922	No data
scaffold_11	NVE1219	gene_body	208177	218245	85371
scaffold_11	NVE1226	gene_body	286927	291681	231946
scaffold_11	NVE1229	gene_body	310230	327066	85398
scaffold_11	NVE1240	gene_body	431316	438517	85406
scaffold_11	NVE1245	gene_body	472748	477849	85456
scaffold_11	NVE1248	gene_body	529187	537037	239035
scaffold_11	NVE1254	gene_body	567994	578006	198653
scaffold_11	NVE1270	gene_body	725310	797134	239043
scaffold_11	NVE1277	gene_body	873205	875014	198676
scaffold_11	NVE1284	gene_body	935666	937224	239048
scaffold_11	NVE1295	gene_body	1101059	1104770	239055
scaffold_11	NVE1301	gene_body	1145501	1147868	85267
scaffold_11	NVE1304	gene_body	1165449	1166650	198706
scaffold_11	NVE1313	gene_body	1216565	1221747	No data
scaffold_11	NVE1325	gene_body	1370262	1376665	No data
scaffold_11	NVE1329	gene_body	1448340	1454411	160000
scaffold_11	NVE1342	gene_body	1574998	1587809	85562
scaffold_11	NVE1346	gene_body	1604949	1611697	198747
scaffold_11	NVE1348	gene_body	1617061	1619978	No data
scaffold_11	NVE1378	gene_body	1948365	1963811	226311
scaffold_12	NVE2045	gene_body	20776	21950	70468
scaffold_12	NVE2055	gene_body	124816	131149	86018
scaffold_12	NVE2063	gene_body	203380	209397	179325
scaffold_12	NVE2075	gene_body	321160	323877	160099
scaffold_12	NVE2076	gene_body	324028	343662	239114
scaffold_12	NVE2081	gene_body	364998	368072	239118
scaffold_12	NVE2086	gene_body	387464	389686	No data
scaffold_12	NVE2091	gene_body	414134	430292	No data
scaffold_12	NVE2094	gene_body	446522	455832	85951
scaffold_12	NVE2103	gene_body	557112	559820	85719
scaffold_12	NVE2118	gene_body	663495	670040	85806
scaffold_12	NVE2128	gene_body	742730	779788	198867
scaffold_12	NVE2129	gene_body	790450	823638	198868
scaffold_12	NVE2133	gene_body	882269	888137	160170
scaffold_12	NVE2142	gene_body	985967	1006407	35366
scaffold_12	NVE2146	gene_body	1027379	1035727	No data
scaffold_12	NVE2149	gene_body	1051831	1061556	No data
scaffold_12	NVE2155	gene_body	1105557	1112032	31824
scaffold_12	NVE2164	gene_body	1165778	1171296	85988
scaffold_12	NVE2166	gene_body	1178437	1179601	198910
scaffold_12	NVE2171	gene_body	1235277	1239506	198917
scaffold_12	NVE2173	gene_body	1253861	1263525	239167
scaffold_12	NVE2198	gene_body	1399236	1401990	198947
scaffold_12	NVE2200	gene_body	1410712	1432010	198950
scaffold_12	NVE2203	gene_body	1458371	1462022	239183
scaffold_12	NVE2214	gene_body	1540528	1561510	60841
scaffold_12	NVE2219	gene_body	1605202	1607093	179472
scaffold_12	NVE2224	gene_body	1639644	1656298	85808
scaffold_12	NVE2231	gene_body	1707543	1708813	239194
scaffold_12	NVE2243	gene_body	1765168	1774982	85952
scaffold_12	NVE2247	gene_body	1815008	1827982	86020
scaffold_13	NVE2897	gene_body	22917	28295	239206
scaffold_13	NVE2910	gene_body	114653	122775	86614
scaffold_13	NVE2912	gene_body	137836	143104	239221
scaffold_13	NVE2925	gene_body	276581	295602	86507
scaffold_13	NVE2934	gene_body	356416	366184	30047
scaffold_13	NVE2938	gene_body	391595	435580	160307
scaffold_13	NVE2947	gene_body	496640	501200	86646
scaffold_13	NVE2951	gene_body	521606	563700	86315
scaffold_13	NVE2972	gene_body	791580	824944	86416
scaffold_13	NVE2993	gene_body	973685	978204	239278
scaffold_13	NVE2996	gene_body	988865	1007449	231988
scaffold_13	NVE3004	gene_body	1066039	1077043	31174
scaffold_13	NVE3017	gene_body	1140029	1155843	239294
scaffold_13	NVE3027	gene_body	1224463	1251371	30351
scaffold_13	NVE3035	gene_body	1313423	1318301	199157
scaffold_13	NVE3059	gene_body	1508947	1518615	86429
scaffold_13	NVE3083	gene_body	1679417	1681371	35350
scaffold_13	NVE3097	gene_body	1757048	1761581	86262
scaffold_14	NVE3778	gene_body	108386	122270	No data
scaffold_14	NVE3782	gene_body	176764	180085	No data
scaffold_14	NVE3788	gene_body	234668	243809	234208
scaffold_14	NVE3823	gene_body	516647	531905	63580
scaffold_14	NVE3825	gene_body	567317	604915	87003
scaffold_14	NVE3826	gene_body	607765	627385	179780
scaffold_14	NVE3842	gene_body	745586	749157	239381
scaffold_14	NVE3845	gene_body	774098	779117	232015
scaffold_14	NVE3854	gene_body	896917	902575	86891
scaffold_14	NVE3858	gene_body	980668	1030695	30005
scaffold_14	NVE3872	gene_body	1172113	1182384	179827
scaffold_14	NVE3914	gene_body	1607072	1626070	86734
scaffold_14	NVE3929	gene_body	1718481	1729702	86861
scaffold_15	NVE4655	gene_body	394662	404816	No data
scaffold_15	NVE4668	gene_body	589826	612363	160704
scaffold_15	NVE4677	gene_body	708553	721047	199457
scaffold_15	NVE4695	gene_body	877380	878972	199481
scaffold_15	NVE4704	gene_body	1071762	1080216	87080
scaffold_15	NVE4719	gene_body	1269943	1300875	87270
scaffold_15	NVE4726	gene_body	1371886	1375982	239489
scaffold_15	NVE4740	gene_body	1525409	1535573	87358
scaffold_16	NVE5374	gene_body	7831	17645	87516
scaffold_16	NVE5381	gene_body	101586	112003	87502
scaffold_16	NVE5400	gene_body	269988	271114	160811
scaffold_16	NVE5427	gene_body	546771	552558	160841
scaffold_16	NVE5470	gene_body	1046716	1057170	87392
scaffold_16	NVE5488	gene_body	1220667	1231620	180130
scaffold_16	NVE5489	gene_body	1233582	1255220	239562
scaffold_16	NVE5493	gene_body	1304341	1322798	31418
scaffold_16	NVE5516	gene_body	1479801	1496975	87452
scaffold_17	NVE6129	gene_body	241406	251464	239599
scaffold_17	NVE6138	gene_body	332525	341464	239603
scaffold_17	NVE6141	gene_body	359668	370548	87917
scaffold_17	NVE6148	gene_body	414453	424708	239607
scaffold_17	NVE6154	gene_body	455149	460883	239609
scaffold_17	NVE6160	gene_body	510986	533188	239614
scaffold_17	NVE6164	gene_body	552566	577195	87786
scaffold_17	NVE6177	gene_body	700872	714685	87987
scaffold_17	NVE6178	gene_body	715826	716920	88155
scaffold_17	NVE6201	gene_body	927496	944866	88076
scaffold_17	NVE6209	gene_body	985113	992855	239633
scaffold_17	NVE6218	gene_body	1097498	1114611	30743
scaffold_17	NVE6226	gene_body	1177992	1198546	88040
scaffold_17	NVE6239	gene_body	1321556	1324356	239651
scaffold_17	NVE6253	gene_body	1535488	1542752	199864
scaffold_18	NVE6830	gene_body	34666	59426	180295
scaffold_18	NVE6843	gene_body	136086	143459	No data
scaffold_18	NVE6856	gene_body	276480	330794	59990
scaffold_18	NVE6859	gene_body	346967	350159	199909
scaffold_18	NVE6868	gene_body	431160	440743	No data
scaffold_18	NVE6871	gene_body	452510	454946	239679
scaffold_18	NVE6872	gene_body	454970	455449	239680
scaffold_18	NVE6886	gene_body	542849	588284	88429
scaffold_18	NVE6891	gene_body	633566	636328	No data
scaffold_18	NVE6899	gene_body	701884	702842	199953
scaffold_18	NVE6912	gene_body	1063010	1064694	239698
scaffold_18	NVE6926	gene_body	1181470	1193409	239710
scaffold_18	NVE6927	gene_body	1196759	1206187	234286
scaffold_18	NVE6929	gene_body	1214110	1223688	88290
scaffold_18	NVE6940	gene_body	1338069	1353053	199992
scaffold_18	NVE6941	gene_body	1354139	1362063	199992
scaffold_19	NVE7438	gene_body	9306	16037	No data
scaffold_19	NVE7462	gene_body	251922	261129	88820
scaffold_19	NVE7465	gene_body	293208	303769	200034
scaffold_19	NVE7479	gene_body	462479	489214	63233
scaffold_19	NVE7484	gene_body	536197	580680	200061
scaffold_19	NVE7487	gene_body	627307	642044	No data
scaffold_19	NVE7488	gene_body	649537	659821	No data
scaffold_19	NVE7522	gene_body	1024228	1037533	200105
scaffold_19	NVE7537	gene_body	1337714	1346658	88939
scaffold_19	NVE7540	gene_body	1377040	1388228	239773
scaffold_19	NVE7546	gene_body	1428863	1432557	88941
scaffold_19	NVE7554	gene_body	1541015	1547029	88709
scaffold_19	NVE7555	gene_body	1595095	1601336	88884
scaffold_20	NVE8264	gene_body	55826	61956	239785
scaffold_20	NVE8287	gene_body	263221	269215	200188
scaffold_20	NVE8290	gene_body	302838	321010	70665
scaffold_20	NVE8297	gene_body	392716	394436	161288
scaffold_20	NVE8306	gene_body	463258	468826	200209
scaffold_20	NVE8311	gene_body	503551	514335	89177
scaffold_20	NVE8314	gene_body	529192	538500	200214
scaffold_20	NVE8333	gene_body	721726	725310	236522
scaffold_20	NVE8352	gene_body	921433	926867	200262
scaffold_20	NVE8353	gene_body	927484	938052	No data
scaffold_20	NVE8379	gene_body	1184718	1187190	No data
scaffold_21	NVE8821	gene_body	115397	127795	89566
scaffold_21	NVE8824	gene_body	151936	163648	180632
scaffold_21	NVE8844	gene_body	288769	309984	200349
scaffold_21	NVE8870	gene_body	471887	492989	89573
scaffold_21	NVE8878	gene_body	549588	569581	239885
scaffold_21	NVE8882	gene_body	616089	654697	200386
scaffold_21	NVE8892	gene_body	748988	757431	239896
scaffold_21	NVE8902	gene_body	930953	940371	No data
scaffold_21	NVE8920	gene_body	1247101	1265687	89511
scaffold_21	NVE8926	gene_body	1332954	1339247	89364
scaffold_22	NVE9391	gene_body	70067	79195	239919
scaffold_22	NVE9392	gene_body	80051	95525	200487
scaffold_22	NVE9399	gene_body	137756	148590	200495
scaffold_22	NVE9437	gene_body	453254	480532	239945
scaffold_22	NVE9441	gene_body	518150	536571	161519
scaffold_22	NVE9446	gene_body	616943	634591	89632
scaffold_22	NVE9461	gene_body	802388	817796	34050
scaffold_22	NVE9479	gene_body	982033	986028	89857
scaffold_22	NVE9482	gene_body	1028016	1042300	180796
scaffold_22	NVE9495	gene_body	1193156	1209993	89877
scaffold_22	NVE9507	gene_body	1364385	1377439	232128
scaffold_22	NVE9518	gene_body	1527844	1540038	89765
scaffold_22	NVE9519	gene_body	1541848	1547843	89807
scaffold_23	NVE9882	gene_body	25476	53485	ENSRNA022726938
scaffold_23	NVE9890	gene_body	170452	215056	30941
scaffold_23	NVE9891	gene_body	224503	231421	161623
scaffold_23	NVE9894	gene_body	264723	271307	90196
scaffold_23	NVE9896	gene_body	281872	286545	236543
scaffold_23	NVE9924	gene_body	590110	599528	90152
scaffold_23	NVE9927	gene_body	632729	645663	90236
scaffold_23	NVE9929	gene_body	674279	687124	90326
scaffold_23	NVE9938	gene_body	808773	814247	240021
scaffold_23	NVE9940	gene_body	841293	858987	90372
scaffold_23	NVE9947	gene_body	982802	988593	200723
scaffold_23	NVE9954	gene_body	1138346	1151102	90331
scaffold_23	NVE9963	gene_body	1257738	1262076	No data
scaffold_23	NVE9980	gene_body	1419002	1429486	90063
scaffold_24	NVE10336	gene_body	301731	348765	90581
scaffold_24	NVE10338	gene_body	364928	382291	61541
scaffold_24	NVE10343	gene_body	415849	423441	90480
scaffold_24	NVE10368	gene_body	647374	651208	No data
scaffold_24	NVE10370	gene_body	658279	667303	240079
scaffold_24	NVE10382	gene_body	745338	758626	240082
scaffold_24	NVE10405	gene_body	988137	992726	232141
scaffold_24	NVE10409	gene_body	1023339	1032586	41807
scaffold_24	NVE10414	gene_body	1073844	1094398	34458
scaffold_24	NVE10421	gene_body	1173694	1209108	90622
scaffold_24	NVE10434	gene_body	1399283	1404676	No data
scaffold_24	NVE10437	gene_body	1435333	1453777	200924
scaffold_24	NVE10438	gene_body	1455423	1471178	200924
scaffold_25	NVE10786	gene_body	1	36175	200933
scaffold_25	NVE10788	gene_body	75606	76698	234362
scaffold_25	NVE10789	gene_body	101618	107925	68155
scaffold_25	NVE10801	gene_body	216397	224516	240123
scaffold_25	NVE10802	gene_body	245917	268732	36069
scaffold_25	NVE10815	gene_body	416504	423592	240133
scaffold_25	NVE10818	gene_body	441394	447092	240136
scaffold_25	NVE10845	gene_body	747854	759106	240145
scaffold_25	NVE10854	gene_body	913834	930938	90859
scaffold_25	NVE10870	gene_body	1063634	1070661	240163
scaffold_25	NVE10874	gene_body	1084264	1093308	234370
scaffold_25	NVE10881	gene_body	1211060	1218464	40628
scaffold_25	NVE10890	gene_body	1358467	1371111	201054
scaffold_26	NVE11231	gene_body	108916	143578	91247
scaffold_26	NVE11241	gene_body	205493	207551	201096
scaffold_26	NVE11264	gene_body	454023	462407	201119
scaffold_26	NVE11282	gene_body	625490	632034	91139
scaffold_26	NVE11284	gene_body	644140	671414	161999
scaffold_26	NVE11288	gene_body	705011	726330	91150
scaffold_26	NVE11295	gene_body	775873	782650	181253
scaffold_26	NVE11302	gene_body	846132	846960	No data
scaffold_26	NVE11314	gene_body	987245	991822	201177
scaffold_26	NVE11316	gene_body	995556	1000654	No data
scaffold_26	NVE11318	gene_body	1021666	1028114	201179
scaffold_26	NVE11323	gene_body	1070631	1087939	91046
scaffold_26	NVE11325	gene_body	1105450	1118775	232179
scaffold_26	NVE11337	gene_body	1181330	1188882	31464
scaffold_26	NVE11372	gene_body	1532991	1540211	201235
scaffold_27	NVE11705	gene_body	96916	113880	91648
scaffold_27	NVE11715	gene_body	250164	258088	29999
scaffold_27	NVE11775	gene_body	1134946	1153163	91325
scaffold_27	NVE11783	gene_body	1213426	1238134	201344
scaffold_27	NVE11796	gene_body	1296976	1302714	91438
scaffold_27	NVE11816	gene_body	1508550	1520678	91406
scaffold_28	NVE12089	gene_body	123577	133245	91819
scaffold_28	NVE12097	gene_body	217730	224764	91832
scaffold_28	NVE12099	gene_body	226694	269389	91985
scaffold_28	NVE12101	gene_body	307399	312879	240368
scaffold_28	NVE12112	gene_body	412204	435984	91901
scaffold_28	NVE12117	gene_body	461935	496793	91986
scaffold_28	NVE12121	gene_body	523426	549741	91976
scaffold_28	NVE12126	gene_body	579752	593416	91949
scaffold_28	NVE12140	gene_body	779785	789219	240393
scaffold_28	NVE12146	gene_body	853705	859445	91941
scaffold_28	NVE12148	gene_body	871465	873055	No data
scaffold_28	NVE12158	gene_body	1000605	1021243	91794
scaffold_28	NVE12174	gene_body	1249303	1263363	91926
scaffold_28	NVE12180	gene_body	1305554	1310272	35459
scaffold_28	NVE12193	gene_body	1515932	1531946	66147
scaffold_29	NVE12492	gene_body	281045	304739	181511
scaffold_29	NVE12494	gene_body	309355	327593	240424
scaffold_29	NVE12496	gene_body	341256	359744	240426
scaffold_29	NVE12514	gene_body	680894	700398	92093
scaffold_29	NVE12518	gene_body	736410	745808	228652
scaffold_29	NVE12526	gene_body	816159	822853	181539
scaffold_29	NVE12533	gene_body	922833	926551	No data
scaffold_29	NVE12559	gene_body	1337693	1352697	92292
scaffold_29	NVE12561	gene_body	1355003	1361447	33780
scaffold_29	NVE12568	gene_body	1412824	1423762	240452
scaffold_30	NVE13064	gene_body	212959	225312	201671
scaffold_30	NVE13073	gene_body	304871	311322	92539
scaffold_30	NVE13074	gene_body	315463	325037	201686
scaffold_30	NVE13084	gene_body	417234	422572	201700
scaffold_30	NVE13088	gene_body	512825	521782	234424
scaffold_30	NVE13092	gene_body	544917	558041	181577
scaffold_30	NVE13094	gene_body	568568	608326	92641
scaffold_30	NVE13116	gene_body	807497	815870	92366
scaffold_30	NVE13126	gene_body	930654	938632	34356
scaffold_30	NVE13132	gene_body	979603	985966	No data
scaffold_30	NVE13135	gene_body	1004984	1017442	162370
scaffold_30	NVE13137	gene_body	1029837	1034412	92616
scaffold_30	NVE13156	gene_body	1161074	1182484	201791
scaffold_31	NVE13501	gene_body	113126	126210	20898
scaffold_31	NVE13529	gene_body	367495	385423	92887
scaffold_31	NVE13563	gene_body	726659	730643	240569
scaffold_31	NVE13565	gene_body	749113	750452	No data
scaffold_31	NVE13567	gene_body	762709	801593	240570
scaffold_31	NVE13580	gene_body	943707	948445	63798
scaffold_31	NVE13581	gene_body	971467	987075	201944
scaffold_31	NVE13586	gene_body	1057019	1060177	240582
scaffold_31	NVE13592	gene_body	1127489	1144587	201958
scaffold_31	NVE13596	gene_body	1192936	1200814	201964
scaffold_31	NVE13604	gene_body	1250436	1259814	240589
scaffold_31	NVE13607	gene_body	1274306	1282744	181774
scaffold_31	NVE13611	gene_body	1323626	1335994	201977
scaffold_31	NVE13615	gene_body	1347556	1354234	92936
scaffold_32	NVE13846	gene_body	44336	55385	240601
scaffold_32	NVE13853	gene_body	148236	156535	64855
scaffold_32	NVE13855	gene_body	167752	179460	93135
scaffold_32	NVE13865	gene_body	263755	271400	93321
scaffold_32	NVE13877	gene_body	393449	405481	240614
scaffold_32	NVE13879	gene_body	426032	444250	39708
scaffold_32	NVE13892	gene_body	552976	560447	202038
scaffold_32	NVE13900	gene_body	602113	614835	33659
scaffold_32	NVE13921	gene_body	769343	784351	202069
scaffold_32	NVE13932	gene_body	896051	907335	31202
scaffold_32	NVE13955	gene_body	1062960	1078083	228736
scaffold_32	NVE13958	gene_body	1094934	1099549	162677
scaffold_32	NVE13962	gene_body	1120419	1121903	No data
scaffold_32	NVE13979	gene_body	1244834	1260199	93171
scaffold_32	NVE13985	gene_body	1299394	1328193	92988
scaffold_33	NVE14178	gene_body	10953	19203	93564
scaffold_33	NVE14193	gene_body	129916	135648	181975
scaffold_33	NVE14204	gene_body	243847	254487	93567
scaffold_33	NVE14213	gene_body	323448	326696	202195
scaffold_33	NVE14226	gene_body	456377	464702	240720
scaffold_33	NVE14228	gene_body	474077	487637	93522
scaffold_33	NVE14249	gene_body	705247	731871	50036
scaffold_33	NVE14255	gene_body	765522	776644	93653
scaffold_33	NVE14263	gene_body	856560	862554	93548
scaffold_33	NVE14275	gene_body	968424	980482	93732
scaffold_33	NVE14277	gene_body	983394	1003395	240748
scaffold_33	NVE14279	gene_body	1008934	1017308	240750
scaffold_33	NVE14282	gene_body	1033954	1059841	93709
scaffold_33	NVE14292	gene_body	1168205	1182773	240756
scaffold_33	NVE14305	gene_body	1291384	1292421	240761
scaffold_33	NVE14310	gene_body	1335352	1341985	182064
scaffold_34	NVE14526	gene_body	24206	30211	182068
scaffold_34	NVE14528	gene_body	46297	78145	50205
scaffold_34	NVE14537	gene_body	206596	209374	240774
scaffold_34	NVE14546	gene_body	319045	323667	93841
scaffold_34	NVE14555	gene_body	448832	451788	202338
scaffold_34	NVE14565	gene_body	542127	557805	93994
scaffold_34	NVE14576	gene_body	680090	706722	30774
scaffold_34	NVE14596	gene_body	992360	995664	202389
scaffold_34	NVE14607	gene_body	1090001	1090609	93961
scaffold_34	NVE14613	gene_body	1184012	1185281	93919
scaffold_34	NVE14620	gene_body	1242504	1248741	93883
scaffold_34	NVE14621	gene_body	1249202	1268719	93936
scaffold_35	NVE14846	gene_body	111862	135705	94112
scaffold_35	NVE14851	gene_body	209989	213153	No data
scaffold_35	NVE14857	gene_body	267280	279048	20744
scaffold_35	NVE14874	gene_body	509640	557867	94054
scaffold_35	NVE14879	gene_body	601539	607307	94098
scaffold_35	NVE14881	gene_body	612039	622037	94276
scaffold_35	NVE14882	gene_body	622208	626922	236658
scaffold_35	NVE14888	gene_body	663258	678591	94057
scaffold_35	NVE14896	gene_body	784427	787258	94277
scaffold_35	NVE14901	gene_body	823007	828321	No data
scaffold_35	NVE14927	gene_body	1073727	1078306	182231
scaffold_35	NVE14929	gene_body	1117194	1120676	94236
scaffold_35	NVE14935	gene_body	1153398	1171686	240861
scaffold_36	NVE15183	gene_body	486507	552150	59988
scaffold_36	NVE15187	gene_body	572863	586935	94443
scaffold_36	NVE15192	gene_body	636386	676560	94433
scaffold_36	NVE15206	gene_body	770135	779902	240891
scaffold_36	NVE15232	gene_body	1126974	1176325	94425
scaffold_37	NVE15415	gene_body	59326	78190	182319
scaffold_37	NVE15419	gene_body	92647	97245	94838
scaffold_37	NVE15427	gene_body	164119	171684	94579
scaffold_37	NVE15431	gene_body	203195	206529	No data
scaffold_37	NVE15443	gene_body	284225	290549	20693
scaffold_37	NVE15448	gene_body	319925	326882	202664
scaffold_37	NVE15450	gene_body	339124	385302	163137
scaffold_37	NVE15456	gene_body	457185	463953	240936
scaffold_37	NVE15462	gene_body	504315	508493	240939
scaffold_37	NVE15463	gene_body	511164	521294	163150
scaffold_37	NVE15466	gene_body	536705	556211	94796
scaffold_37	NVE15469	gene_body	568643	590531	163153
scaffold_37	NVE15471	gene_body	604242	614091	202687
scaffold_37	NVE15473	gene_body	622470	625709	202690
scaffold_37	NVE15492	gene_body	755231	775689	94726
scaffold_37	NVE15493	gene_body	777140	790571	94752
scaffold_37	NVE15497	gene_body	822300	830599	202715
scaffold_37	NVE15519	gene_body	1054518	1072152	94578
scaffold_37	NVE15520	gene_body	1080298	1085822	94740
scaffold_37	NVE15522	gene_body	1100478	1109800	94826
scaffold_37	NVE15525	gene_body	1130137	1145437	60847
scaffold_37	NVE15543	gene_body	1274644	1280213	240980
scaffold_38	NVE15776	gene_body	104146	108613	163197
scaffold_38	NVE15798	gene_body	297575	314724	95089
scaffold_38	NVE15812	gene_body	469520	487804	95129
scaffold_38	NVE15823	gene_body	583112	602072	95035
scaffold_38	NVE15830	gene_body	675023	680051	163275
scaffold_38	NVE15838	gene_body	734491	742885	241031
scaffold_38	NVE15856	gene_body	905477	919001	30589
scaffold_38	NVE15868	gene_body	1006211	1009761	202891
scaffold_38	NVE15872	gene_body	1041738	1059202	241051
scaffold_38	NVE15884	gene_body	1214038	1216914	37059
scaffold_38	NVE15886	gene_body	1225123	1230507	94893
scaffold_38	NVE15887	gene_body	1232576	1259144	94893
scaffold_39	NVE16058	gene_body	65996	74510	95313
scaffold_39	NVE16068	gene_body	240950	245158	241065
scaffold_39	NVE16069	gene_body	245750	257538	95344
scaffold_39	NVE16071	gene_body	388871	436965	163339
scaffold_39	NVE16073	gene_body	438330	454110	64334
scaffold_39	NVE16074	gene_body	439934	443268	No data
scaffold_39	NVE16083	gene_body	510558	519292	234558
scaffold_39	NVE16106	gene_body	805505	865463	95408
scaffold_39	NVE16122	gene_body	973147	992291	95445
scaffold_39	NVE16135	gene_body	1107834	1133622	241098
scaffold_39	NVE16141	gene_body	1192630	1197032	182635
scaffold_40	NVE16558	gene_body	251292	260267	163440
scaffold_40	NVE16571	gene_body	342743	347106	182684
scaffold_40	NVE16575	gene_body	378822	392323	241129
scaffold_40	NVE16580	gene_body	464812	482586	95736
scaffold_40	NVE16582	gene_body	487481	499831	163453
scaffold_40	NVE16593	gene_body	621978	625113	203088
scaffold_40	NVE16594	gene_body	629284	652187	35757
scaffold_40	NVE16596	gene_body	636868	640396	No data
scaffold_40	NVE16613	gene_body	821962	832956	203118
scaffold_40	NVE16633	gene_body	1014893	1038866	241158
scaffold_40	NVE16644	gene_body	1148120	1158138	203150
scaffold_40	NVE16645	gene_body	1165926	1179268	95571
scaffold_40	NVE16646	gene_body	1194799	1205758	95672
scaffold_40	NVE16649	gene_body	1246298	1253922	95717
scaffold_41	NVE16786	gene_body	8607	38125	95942
scaffold_41	NVE16791	gene_body	84377	92035	96020
scaffold_41	NVE16806	gene_body	211730	221109	No data
scaffold_41	NVE16814	gene_body	301316	304879	163524
scaffold_41	NVE16824	gene_body	411307	416505	95856
scaffold_41	NVE16840	gene_body	616269	655907	95966
scaffold_41	NVE16855	gene_body	792292	801627	96024
scaffold_41	NVE16856	gene_body	831674	840837	95956
scaffold_41	NVE16864	gene_body	996143	997223	No data
scaffold_41	NVE16866	gene_body	1020126	1031140	203264
scaffold_41	NVE16879	gene_body	1132125	1152999	182805
scaffold_41	NVE16880	gene_body	1154440	1159138	No data
scaffold_42	NVE17044	gene_body	89726	94630	96298
scaffold_42	NVE17091	gene_body	586546	588105	241236
scaffold_42	NVE17092	gene_body	589352	603712	241237
scaffold_42	NVE17100	gene_body	733031	734875	203359
scaffold_42	NVE17110	gene_body	877475	879179	No data
scaffold_42	NVE17137	gene_body	1159612	1167576	No data
scaffold_42	NVE17138	gene_body	1169297	1180791	96295
scaffold_43	NVE17303	gene_body	29047	30205	No data
scaffold_43	NVE17324	gene_body	172081	182035	22981
scaffold_43	NVE17332	gene_body	281578	291526	182924
scaffold_43	NVE17350	gene_body	505274	523389	203470
scaffold_43	NVE17372	gene_body	742121	752455	203495
scaffold_43	NVE17382	gene_body	823721	828867	241308
scaffold_43	NVE17389	gene_body	886183	898371	96691
scaffold_44	NVE17574	gene_body	107857	112125	241341
scaffold_44	NVE17603	gene_body	351886	354024	34059
scaffold_44	NVE17609	gene_body	403205	414438	241362
scaffold_44	NVE17619	gene_body	487972	497068	163860
scaffold_44	NVE17625	gene_body	560520	586624	96774
scaffold_44	NVE17639	gene_body	694529	707964	96736
scaffold_44	NVE17641	gene_body	730239	731763	No data
scaffold_44	NVE17643	gene_body	733849	744293	96883
scaffold_44	NVE17644	gene_body	744669	752825	96883
scaffold_44	NVE17674	gene_body	948367	951639	203669
scaffold_44	NVE17677	gene_body	965930	967049	96958
scaffold_44	NVE17678	gene_body	972130	986686	203674
scaffold_44	NVE17690	gene_body	1093456	1108649	241402
scaffold_44	NVE17696	gene_body	1133917	1144745	226620
scaffold_45	NVE17811	gene_body	1	19745	60191
scaffold_45	NVE17870	gene_body	769483	776811	241440
scaffold_45	NVE17874	gene_body	805533	813891	203775
scaffold_45	NVE17877	gene_body	836606	845983	97278
scaffold_45	NVE17902	gene_body	1189237	1195445	164009
scaffold_45	NVE17903	gene_body	1196637	1212655	164013
scaffold_46	NVE18010	gene_body	9882	12135	241459
scaffold_46	NVE18012	gene_body	20327	31595	No data
scaffold_46	NVE18017	gene_body	49077	57995	97514
scaffold_46	NVE18018	gene_body	58605	66855	228977
scaffold_46	NVE18027	gene_body	168787	190955	203827
scaffold_46	NVE18035	gene_body	264129	276397	241470
scaffold_46	NVE18071	gene_body	629768	634932	236739
scaffold_46	NVE18080	gene_body	730176	741044	No data
scaffold_46	NVE18085	gene_body	793585	802222	No data
scaffold_46	NVE18089	gene_body	827186	828184	97377
scaffold_46	NVE18106	gene_body	994611	1002225	97507
scaffold_46	NVE18121	gene_body	1150857	1157031	241523
scaffold_47	NVE18254	gene_body	73706	79030	No data
scaffold_47	NVE18267	gene_body	163722	192845	228999
scaffold_47	NVE18269	gene_body	202842	211317	29089
scaffold_47	NVE18310	gene_body	693260	704755	241567
scaffold_47	NVE18312	gene_body	744786	786742	97863
scaffold_47	NVE18318	gene_body	847546	874722	97775
scaffold_47	NVE18335	gene_body	1095370	1107024	164242
scaffold_48	NVE18466	gene_body	1217	11860	98098
scaffold_48	NVE18469	gene_body	20935	26735	232456
scaffold_48	NVE18487	gene_body	268057	297567	98237
scaffold_48	NVE18495	gene_body	393585	404029	241615
scaffold_48	NVE18501	gene_body	474071	479779	204127
scaffold_48	NVE18508	gene_body	551532	566476	204136
scaffold_48	NVE18516	gene_body	634112	638470	241628
scaffold_48	NVE18520	gene_body	664842	680684	241631
scaffold_48	NVE18535	gene_body	819977	828140	No data
scaffold_48	NVE18544	gene_body	903686	912708	164307
scaffold_48	NVE18548	gene_body	942359	948773	236766
scaffold_48	NVE18551	gene_body	978696	985950	98197
scaffold_49	NVE18705	gene_body	373801	389105	98273
scaffold_49	NVE18721	gene_body	503449	515320	98373
scaffold_49	NVE18726	gene_body	592544	628252	98341
scaffold_49	NVE18739	gene_body	799767	811285	98319
scaffold_49	NVE18767	gene_body	1067908	1078672	No data
scaffold_49	NVE18768	gene_body	1078768	1105682	59993
scaffold_49	NVE18774	gene_body	1150879	1166397	204314
scaffold_50	NVE19169	gene_body	322425	330805	No data
scaffold_50	NVE19175	gene_body	348846	359894	98626
scaffold_50	NVE19178	gene_body	377649	385301	204353
scaffold_50	NVE19188	gene_body	591509	595993	98567
scaffold_50	NVE19199	gene_body	718909	720143	26251
scaffold_50	NVE19205	gene_body	777187	790082	98596
scaffold_50	NVE19213	gene_body	911652	927996	22270
scaffold_50	NVE19229	gene_body	1044943	1050951	204405
scaffold_51	NVE19335	gene_body	39556	42064	204423
scaffold_51	NVE19341	gene_body	80896	84920	52231
scaffold_51	NVE19345	gene_body	122566	127534	204434
scaffold_51	NVE19347	gene_body	132916	145675	98950
scaffold_51	NVE19354	gene_body	239100	251314	99015
scaffold_51	NVE19360	gene_body	339913	348279	99026
scaffold_51	NVE19364	gene_body	395095	400499	98823
scaffold_51	NVE19366	gene_body	413302	421904	241766
scaffold_51	NVE19368	gene_body	433375	446176	241768
scaffold_51	NVE19376	gene_body	509325	518002	234681
scaffold_51	NVE19377	gene_body	518687	524104	204466
scaffold_51	NVE19379	gene_body	538745	551969	20990
scaffold_51	NVE19387	gene_body	623354	633972	164541
scaffold_51	NVE19394	gene_body	719023	731457	98945
scaffold_51	NVE19436	gene_body	1107194	1118662	98908
scaffold_52	NVE19513	gene_body	56293	73325	99225
scaffold_52	NVE19556	gene_body	527117	538331	99345
scaffold_52	NVE19566	gene_body	639357	647691	204602
scaffold_52	NVE19572	gene_body	688912	694896	99103
scaffold_52	NVE19589	gene_body	818018	827506	99332
scaffold_52	NVE19597	gene_body	916186	918074	63846
scaffold_52	NVE19602	gene_body	961890	968705	183924
scaffold_52	NVE19606	gene_body	996447	1015675	99266
scaffold_52	NVE19607	gene_body	1022345	1062760	99167
scaffold_53	NVE19718	gene_body	313	11035	234699
scaffold_53	NVE19737	gene_body	156416	160120	241879
scaffold_53	NVE19741	gene_body	179590	191414	99527
scaffold_53	NVE19748	gene_body	228633	232979	99425
scaffold_53	NVE19754	gene_body	313081	319509	164749
scaffold_53	NVE19755	gene_body	319941	326579	164749
scaffold_53	NVE19793	gene_body	723702	736972	241916
scaffold_53	NVE19796	gene_body	755693	775347	99557
scaffold_53	NVE19797	gene_body	781666	801662	184029
scaffold_53	NVE19800	gene_body	812418	825062	99543
scaffold_53	NVE19803	gene_body	856063	861211	241923
scaffold_53	NVE19805	gene_body	886665	895582	99372
scaffold_53	NVE19818	gene_body	976582	990856	No data
scaffold_54	NVE19921	gene_body	237287	245055	99877
scaffold_54	NVE19954	gene_body	645325	653573	No data
scaffold_54	NVE19959	gene_body	692164	705838	204856
scaffold_54	NVE19960	gene_body	706991	709796	164893
scaffold_54	NVE19980	gene_body	992084	994778	24362
scaffold_54	NVE19988	gene_body	1074377	1097365	99701
scaffold_54	NVE19991	gene_body	1130036	1141724	No data
scaffold_55	NVE20089	gene_body	88137	95175	99928
scaffold_55	NVE20099	gene_body	229308	230328	No data
scaffold_55	NVE20104	gene_body	258508	268832	100017
scaffold_55	NVE20108	gene_body	302392	304057	No data
scaffold_55	NVE20140	gene_body	537447	540299	164986
scaffold_55	NVE20148	gene_body	585267	601831	204969
scaffold_55	NVE20151	gene_body	618747	634667	204972
scaffold_55	NVE20159	gene_body	682745	684521	204980
scaffold_55	NVE20174	gene_body	800563	813350	24366
scaffold_55	NVE20177	gene_body	824163	834667	242037
scaffold_55	NVE20182	gene_body	878070	882744	242045
scaffold_55	NVE20183	gene_body	883345	904699	242046
scaffold_55	NVE20186	gene_body	955115	963300	242049
scaffold_55	NVE20193	gene_body	1010965	1019652	21646
scaffold_56	NVE20278	gene_body	28106	29939	205039
scaffold_56	NVE20302	gene_body	385456	404574	232545
scaffold_56	NVE20306	gene_body	422226	431314	232547
scaffold_56	NVE20311	gene_body	474156	486549	100273
scaffold_56	NVE20321	gene_body	615160	638764	20907
scaffold_56	NVE20335	gene_body	841743	862847	242081
scaffold_57	NVE20445	gene_body	205875	225229	31039
scaffold_57	NVE20447	gene_body	229595	239559	242105
scaffold_57	NVE20466	gene_body	372798	384866	100473
scaffold_57	NVE20476	gene_body	442117	453801	20232
scaffold_57	NVE20484	gene_body	525967	554671	100515
scaffold_57	NVE20492	gene_body	646961	657453	184407
scaffold_57	NVE20494	gene_body	663722	679610	100379
scaffold_57	NVE20502	gene_body	777200	795388	20187
scaffold_57	NVE20530	gene_body	1047042	1050520	205261
scaffold_58	NVE20593	gene_body	94756	97130	205273
scaffold_58	NVE20603	gene_body	171389	174843	No data
scaffold_58	NVE20609	gene_body	244608	252546	236828
scaffold_58	NVE20613	gene_body	287651	295206	242167
scaffold_58	NVE20615	gene_body	295737	306421	165248
scaffold_58	NVE20616	gene_body	316499	327282	100591
scaffold_58	NVE20630	gene_body	450196	463511	165261
scaffold_58	NVE20642	gene_body	595545	624751	205323
scaffold_58	NVE20666	gene_body	821862	850926	184530
scaffold_58	NVE20671	gene_body	884657	889739	184535
scaffold_58	NVE20675	gene_body	913295	914213	No data
scaffold_58	NVE20681	gene_body	982967	1015179	26847
scaffold_59	NVE20762	gene_body	264726	268254	165358
scaffold_59	NVE20779	gene_body	499722	512906	242232
scaffold_59	NVE20780	gene_body	518462	530526	242232
scaffold_59	NVE20785	gene_body	610951	616791	205427
scaffold_59	NVE20791	gene_body	713663	723111	101137
scaffold_59	NVE20798	gene_body	782959	786900	165376
scaffold_59	NVE20804	gene_body	897857	900696	No data
scaffold_59	NVE20809	gene_body	952937	970108	184615
scaffold_59	NVE20813	gene_body	1029347	1038740	242253
scaffold_60	NVE21101	gene_body	44546	61620	205481
scaffold_60	NVE21103	gene_body	68727	73085	26128
scaffold_60	NVE21102	gene_body	63886	78444	26128
scaffold_60	NVE21137	gene_body	609622	618585	205523
scaffold_60	NVE21146	gene_body	699479	707289	205533
scaffold_60	NVE21149	gene_body	722335	727939	242277
scaffold_60	NVE21151	gene_body	750810	772614	205537
scaffold_61	NVE21228	gene_body	117606	133308	64983
scaffold_61	NVE21230	gene_body	137266	145753	205582
scaffold_61	NVE21241	gene_body	263652	266430	242295
scaffold_61	NVE21249	gene_body	340449	385881	101764
scaffold_61	NVE21268	gene_body	575598	577516	58413
scaffold_61	NVE21284	gene_body	741238	765546	101739
scaffold_61	NVE21295	gene_body	913091	919849	242332
scaffold_61	NVE21307	gene_body	999511	1012905	71009
scaffold_61	NVE21314	gene_body	1040310	1051454	No data
scaffold_62	NVE21377	gene_body	7316	23552	184779
scaffold_62	NVE21379	gene_body	25739	33105	205684
scaffold_62	NVE21392	gene_body	118781	128945	205696
scaffold_62	NVE21398	gene_body	179332	182295	242361
scaffold_62	NVE21409	gene_body	278232	284133	101975
scaffold_62	NVE21411	gene_body	291165	300401	21003
scaffold_62	NVE21416	gene_body	330609	340981	50112
scaffold_62	NVE21418	gene_body	367066	377662	No data
scaffold_62	NVE21426	gene_body	604803	610205	242375
scaffold_62	NVE21450	gene_body	888600	904250	11096
scaffold_62	NVE21459	gene_body	967321	991019	242394
scaffold_62	NVE21462	gene_body	1019893	1035635	205787
scaffold_63	NVE21499	gene_body	46106	59490	165649
scaffold_63	NVE21514	gene_body	200486	214434	165676
scaffold_63	NVE21515	gene_body	216644	233554	102256
scaffold_63	NVE21525	gene_body	356160	419544	165696
scaffold_63	NVE21546	gene_body	629233	644277	205855
scaffold_63	NVE21557	gene_body	797298	812982	205867
scaffold_64	NVE21596	gene_body	9077	33975	165740
scaffold_64	NVE21622	gene_body	483278	490434	205918
scaffold_64	NVE21629	gene_body	618396	619598	15612
scaffold_64	NVE21631	gene_body	636225	645898	242460
scaffold_65	NVE21734	gene_body	161186	164883	165791
scaffold_65	NVE21752	gene_body	399824	419998	102645
scaffold_65	NVE21763	gene_body	540797	555291	242502
scaffold_65	NVE21784	gene_body	798129	801671	206040
scaffold_65	NVE21794	gene_body	909673	918281	206051
scaffold_66	NVE21848	gene_body	66487	80785	242522
scaffold_66	NVE21857	gene_body	138037	146205	20583
scaffold_66	NVE21859	gene_body	151336	152867	102872
scaffold_66	NVE21868	gene_body	234350	235954	26326
scaffold_66	NVE21877	gene_body	298951	315149	206093
scaffold_66	NVE21886	gene_body	478861	513118	102874
scaffold_66	NVE21899	gene_body	693047	714661	20140
scaffold_66	NVE21908	gene_body	780798	801106	206143
scaffold_66	NVE21909	gene_body	801301	802848	242561
scaffold_66	NVE21913	gene_body	823937	839262	242563
scaffold_66	NVE21918	gene_body	927560	935244	102846
scaffold_66	NVE21919	gene_body	935330	941576	102846
scaffold_67	NVE21985	gene_body	171289	200825	20067
scaffold_67	NVE22016	gene_body	507889	519013	242599
scaffold_67	NVE22017	gene_body	526416	532343	242600
scaffold_67	NVE22018	gene_body	532724	542578	103103
scaffold_67	NVE22028	gene_body	648425	662283	166011
scaffold_67	NVE22037	gene_body	733336	745920	242616
scaffold_67	NVE22060	gene_body	895989	898037	ENSRNA022727248
scaffold_67	NVE22061	gene_body	898138	910542	242633
scaffold_67	NVE22070	gene_body	983278	988087	232647
scaffold_68	NVE22138	gene_body	456619	459855	No data
scaffold_68	NVE22139	gene_body	469615	478228	103228
scaffold_68	NVE22140	gene_body	484470	487978	242643
scaffold_68	NVE22142	gene_body	533408	555902	103315
scaffold_68	NVE22143	gene_body	557107	563452	No data
scaffold_68	NVE22167	gene_body	879819	885708	12853
scaffold_68	NVE22174	gene_body	952618	960568	26131
scaffold_69	NVE22232	gene_body	41894	64675	185303
scaffold_69	NVE22240	gene_body	119676	126870	64675
scaffold_69	NVE22250	gene_body	233243	249287	166091
scaffold_69	NVE22255	gene_body	275273	291743	206388
scaffold_69	NVE22259	gene_body	346603	352812	27600
scaffold_69	NVE22272	gene_body	467500	479896	103525
scaffold_69	NVE22292	gene_body	636591	641584	229336
scaffold_69	NVE22294	gene_body	651661	655391	229338
scaffold_69	NVE22295	gene_body	657891	661302	229338
scaffold_69	NVE22297	gene_body	679512	688610	103593
scaffold_69	NVE22314	gene_body	886051	893069	No data
scaffold_69	NVE22317	gene_body	932117	940455	166171
scaffold_70	NVE22603	gene_body	603245	607568	103940
scaffold_70	NVE22614	gene_body	822551	831994	103908
scaffold_70	NVE22615	gene_body	832439	837650	103908
scaffold_70	NVE22622	gene_body	930554	932400	No data
scaffold_70	NVE22619	gene_body	905582	954180	20906
scaffold_71	NVE22688	gene_body	61173	68975	242734
scaffold_71	NVE22689	gene_body	69527	73935	104042
scaffold_71	NVE22695	gene_body	123515	127455	104083
scaffold_71	NVE22697	gene_body	133696	147825	234891
scaffold_71	NVE22702	gene_body	196067	206415	104071
scaffold_71	NVE22711	gene_body	251567	266135	166242
scaffold_71	NVE22712	gene_body	266686	277150	104011
scaffold_71	NVE22715	gene_body	296223	302215	104003
scaffold_71	NVE22720	gene_body	342238	351924	103955
scaffold_71	NVE22725	gene_body	412465	421059	185477
scaffold_71	NVE22740	gene_body	572328	582166	206596
scaffold_71	NVE22744	gene_body	625027	630963	242764
scaffold_71	NVE22745	gene_body	633014	642676	206603
scaffold_71	NVE22753	gene_body	719163	722970	104046
scaffold_71	NVE22754	gene_body	723981	776095	242771
scaffold_71	NVE22761	gene_body	836971	840466	166299
scaffold_72	NVE22856	gene_body	183723	215260	242783
scaffold_72	NVE22871	gene_body	367607	380328	104202
scaffold_72	NVE22877	gene_body	460580	483138	104385
scaffold_72	NVE22878	gene_body	483689	493997	104399
scaffold_72	NVE22882	gene_body	530433	539906	206682
scaffold_72	NVE22894	gene_body	801749	807043	206698
scaffold_72	NVE22900	gene_body	872329	875393	No data
scaffold_73	NVE22966	gene_body	16316	28445	No data
scaffold_73	NVE22972	gene_body	71536	81520	166341
scaffold_73	NVE22979	gene_body	141286	169926	185581
scaffold_73	NVE22991	gene_body	297824	313809	104479
scaffold_73	NVE23001	gene_body	392022	399837	242817
scaffold_73	NVE23012	gene_body	523399	533107	242822
scaffold_73	NVE23025	gene_body	627529	635407	104526
scaffold_73	NVE23031	gene_body	688712	697742	206771
scaffold_73	NVE23039	gene_body	776042	788202	28038
scaffold_73	NVE23045	gene_body	818403	830299	206784
scaffold_74	NVE23132	gene_body	16916	46757	206807
scaffold_74	NVE23141	gene_body	162617	192165	20036
scaffold_74	NVE23147	gene_body	224020	256391	22099
scaffold_74	NVE23149	gene_body	271531	277869	No data
scaffold_74	NVE23159	gene_body	349850	354528	242869
scaffold_74	NVE23188	gene_body	601231	608387	242883
scaffold_74	NVE23200	gene_body	735570	738738	104847
scaffold_74	NVE23206	gene_body	772199	788153	104836
scaffold_74	NVE23218	gene_body	920815	928307	242908
scaffold_75	NVE23305	gene_body	281433	289648	234942
scaffold_75	NVE23312	gene_body	362646	370625	104924
scaffold_75	NVE23316	gene_body	420657	429155	No data
scaffold_75	NVE23322	gene_body	487566	495893	104958
scaffold_75	NVE23332	gene_body	599038	610046	No data
scaffold_75	NVE23336	gene_body	627622	632751	185829
scaffold_75	NVE23339	gene_body	650423	666981	105101
scaffold_75	NVE23360	gene_body	890271	915012	207013
scaffold_75	NVE23361	gene_body	917244	923972	105050
scaffold_76	NVE23422	gene_body	164961	171715	207033
scaffold_76	NVE23429	gene_body	289042	302410	166626
scaffold_76	NVE23436	gene_body	359235	369249	207057
scaffold_76	NVE23445	gene_body	536903	539861	No data
scaffold_76	NVE23467	gene_body	756393	763727	185875
scaffold_76	NVE23472	gene_body	804327	843981	105283
scaffold_77	NVE23531	gene_body	29737	55665	207112
scaffold_77	NVE23538	gene_body	95566	100005	229445
scaffold_77	NVE23557	gene_body	248971	265169	105532
scaffold_77	NVE23600	gene_body	710285	715773	No data
scaffold_77	NVE23602	gene_body	727753	737525	ENSRNA022727240
scaffold_77	NVE23604	gene_body	741513	758535	207189
scaffold_78	NVE23669	gene_body	244187	261814	105700
scaffold_78	NVE23675	gene_body	295857	301519	243050
scaffold_78	NVE23694	gene_body	480871	482887	No data
scaffold_78	NVE23696	gene_body	490211	497342	243059
scaffold_78	NVE23698	gene_body	509945	531842	105663
scaffold_78	NVE23708	gene_body	592057	617644	243068
scaffold_78	NVE23709	gene_body	618597	624732	243069
scaffold_78	NVE23710	gene_body	633578	661396	No data
scaffold_78	NVE23711	gene_body	663028	675606	No data
scaffold_79	NVE23784	gene_body	2522	8575	236950
scaffold_79	NVE23801	gene_body	153466	165840	105818
scaffold_79	NVE23802	gene_body	166974	179120	207295
scaffold_79	NVE23817	gene_body	376661	387759	105921
scaffold_79	NVE23820	gene_body	425890	431985	53664
scaffold_79	NVE23825	gene_body	461541	492979	166855
scaffold_79	NVE23828	gene_body	513396	514839	No data
scaffold_79	NVE23841	gene_body	610186	613481	2918
scaffold_79	NVE23850	gene_body	682164	687251	243113
scaffold_79	NVE23865	gene_body	816497	833328	166900
scaffold_79	NVE23870	gene_body	875887	892415	105766
scaffold_80	NVE24160	gene_body	292973	298369	29569
scaffold_80	NVE24164	gene_body	334642	359836	207416
scaffold_80	NVE24168	gene_body	379512	399256	226879
scaffold_80	NVE24172	gene_body	430253	450801	105967
scaffold_80	NVE24174	gene_body	472347	473781	207428
scaffold_80	NVE24200	gene_body	714348	719294	235000
scaffold_80	NVE24213	gene_body	827468	846782	167011
scaffold_81	NVE24267	gene_body	111096	129565	207484
scaffold_81	NVE24268	gene_body	129617	176025	207489
scaffold_81	NVE24272	gene_body	239860	241181	243179
scaffold_81	NVE24285	gene_body	367924	376065	106408
scaffold_81	NVE24291	gene_body	455006	469220	243190
scaffold_81	NVE24301	gene_body	578413	603101	64724
scaffold_81	NVE24302	gene_body	606252	615394	25148
scaffold_81	NVE24310	gene_body	692467	696678	207537
scaffold_81	NVE24313	gene_body	732598	737406	51848
scaffold_82	NVE24376	gene_body	213878	222590	243210
scaffold_82	NVE24412	gene_body	640553	659811	167102
scaffold_82	NVE24414	gene_body	681554	688442	229523
scaffold_83	NVE24476	gene_body	55857	58235	No data
scaffold_83	NVE24488	gene_body	122776	125317	243241
scaffold_83	NVE24503	gene_body	265077	276932	243247
scaffold_83	NVE24508	gene_body	319717	370135	106626
scaffold_83	NVE24509	gene_body	371248	385406	243252
scaffold_83	NVE24525	gene_body	467489	481027	236978
scaffold_83	NVE24527	gene_body	504553	523287	243265
scaffold_83	NVE24530	gene_body	558329	582867	20064
scaffold_83	NVE24540	gene_body	720063	732141	243271
scaffold_83	NVE24544	gene_body	762431	765241	243274
scaffold_84	NVE24619	gene_body	487362	503629	243285
scaffold_84	NVE24640	gene_body	676639	685337	167234
scaffold_84	NVE24646	gene_body	725681	730751	229551
scaffold_84	NVE24656	gene_body	813433	817051	186479
scaffold_85	NVE24699	gene_body	157776	164410	229557
scaffold_85	NVE24703	gene_body	193740	201064	207840
scaffold_85	NVE24706	gene_body	247831	252829	No data
scaffold_85	NVE24715	gene_body	329363	350359	107042
scaffold_85	NVE24717	gene_body	363941	374239	107098
scaffold_85	NVE24736	gene_body	575875	588223	186523
scaffold_86	NVE24798	gene_body	129037	135875	No data
scaffold_86	NVE24804	gene_body	157577	175455	167330
scaffold_86	NVE24807	gene_body	200780	209043	207930
scaffold_86	NVE24822	gene_body	548747	570197	107530
scaffold_86	NVE24826	gene_body	684946	695814	107308
scaffold_86	NVE24830	gene_body	727097	735335	186588
scaffold_86	NVE24833	gene_body	746446	749833	No data
scaffold_86	NVE24841	gene_body	809456	821440	243371
scaffold_86	NVE24842	gene_body	822627	830755	22353
scaffold_87	NVE24871	gene_body	10216	25845	207973
scaffold_87	NVE24880	gene_body	211603	219999	207988
scaffold_87	NVE24894	gene_body	418911	427664	107650
scaffold_87	NVE24895	gene_body	428185	438739	107735
scaffold_87	NVE24899	gene_body	465916	502794	208016
scaffold_87	NVE24913	gene_body	698789	706797	107629
scaffold_88	NVE24951	gene_body	112437	127335	21744
scaffold_88	NVE24963	gene_body	202965	209293	107804
scaffold_88	NVE24968	gene_body	250204	261588	108036
scaffold_88	NVE24972	gene_body	294744	323128	107997
scaffold_88	NVE24976	gene_body	367211	369377	208073
scaffold_88	NVE24984	gene_body	468980	473917	208080
scaffold_88	NVE24986	gene_body	483327	489987	232832
scaffold_88	NVE24994	gene_body	525544	531277	No data
scaffold_88	NVE24996	gene_body	542861	554881	107990
scaffold_88	NVE25007	gene_body	621318	644671	20238
scaffold_88	NVE25014	gene_body	696439	706481	208117
scaffold_89	NVE25073	gene_body	130896	135670	208144
scaffold_89	NVE25074	gene_body	139983	154695	108244
scaffold_89	NVE25081	gene_body	215033	223505	229609
scaffold_89	NVE25083	gene_body	241907	262025	186750
scaffold_89	NVE25090	gene_body	305327	323105	No data
scaffold_89	NVE25126	gene_body	571342	576801	167582
scaffold_89	NVE25127	gene_body	585282	592027	243483
scaffold_89	NVE25129	gene_body	607312	609509	No data
scaffold_89	NVE25147	gene_body	815688	833612	21910
scaffold_90	NVE25359	gene_body	37206	47215	108438
scaffold_90	NVE25373	gene_body	238870	260438	108380
scaffold_90	NVE25380	gene_body	358079	374030	108504
scaffold_90	NVE25385	gene_body	448919	471598	108333
scaffold_91	NVE25438	gene_body	62026	71651	108642
scaffold_91	NVE25446	gene_body	139327	142925	21070
scaffold_91	NVE25448	gene_body	156287	189475	243519
scaffold_91	NVE25458	gene_body	322265	330120	108664
scaffold_91	NVE25460	gene_body	339301	344642	208331
scaffold_91	NVE25488	gene_body	629289	640737	108621
scaffold_91	NVE25495	gene_body	704688	707442	No data
scaffold_91	NVE25496	gene_body	714598	759407	21107
scaffold_91	NVE25497	gene_body	762772	775700	243549
scaffold_92	NVE25531	gene_body	6536	16536	208385
scaffold_92	NVE25592	gene_body	467821	491975	243590
scaffold_92	NVE25597	gene_body	541092	547635	75610
scaffold_92	NVE25602	gene_body	569982	587119	10843
scaffold_93	NVE25645	gene_body	12427	19355	208492
scaffold_93	NVE25648	gene_body	46666	48690	109116
scaffold_93	NVE25681	gene_body	371671	410345	109064
scaffold_93	NVE25686	gene_body	466581	486799	108947
scaffold_93	NVE25688	gene_body	500293	509806	25225
scaffold_93	NVE25706	gene_body	701931	718626	75457
scaffold_93	NVE25717	gene_body	804027	818351	109001
scaffold_94	NVE25756	gene_body	134176	147610	109242
scaffold_94	NVE25771	gene_body	289181	296891	No data
scaffold_94	NVE25773	gene_body	308739	310230	243657
scaffold_94	NVE25831	gene_body	755682	762986	No data
scaffold_95	NVE25872	gene_body	203815	212189	41322
scaffold_95	NVE25879	gene_body	332255	334579	No data
scaffold_95	NVE25883	gene_body	363471	397835	229686
scaffold_95	NVE25891	gene_body	465822	477940	109498
scaffold_95	NVE25893	gene_body	487111	490915	208687
scaffold_95	NVE25902	gene_body	566196	571105	No data
scaffold_96	NVE25931	gene_body	55827	88335	208718
scaffold_96	NVE25937	gene_body	132626	136358	No data
scaffold_96	NVE25940	gene_body	165606	181052	187148
scaffold_96	NVE25942	gene_body	201963	226571	109724
scaffold_96	NVE25954	gene_body	406528	429508	25516
scaffold_97	NVE25987	gene_body	85354	96645	No data
scaffold_97	NVE25988	gene_body	97927	112335	No data
scaffold_97	NVE25995	gene_body	174671	211779	109941
scaffold_97	NVE26005	gene_body	303850	327048	109942
scaffold_97	NVE26021	gene_body	500419	510796	22365
scaffold_97	NVE26025	gene_body	550751	564295	208816
scaffold_97	NVE26027	gene_body	566934	582000	187212
scaffold_97	NVE26037	gene_body	674693	677237	109917
scaffold_98	NVE26057	gene_body	17796	26112	243754
scaffold_98	NVE26059	gene_body	35206	74931	110159
scaffold_98	NVE26068	gene_body	151762	154335	243756
scaffold_98	NVE26073	gene_body	192287	200266	208854
scaffold_98	NVE26077	gene_body	251407	265534	243769
scaffold_98	NVE26087	gene_body	379434	380290	110153
scaffold_98	NVE26094	gene_body	443082	465500	110192
scaffold_98	NVE26100	gene_body	538071	544899	No data
scaffold_98	NVE26116	gene_body	714006	717084	187301
scaffold_99	NVE26173	gene_body	164866	169830	110232
scaffold_99	NVE26178	gene_body	216192	230775	No data
scaffold_99	NVE26180	gene_body	311877	318907	110220
scaffold_99	NVE26181	gene_body	321837	349957	168100
scaffold_99	NVE26183	gene_body	382558	406352	No data
scaffold_99	NVE26190	gene_body	500066	507381	50041
scaffold_99	NVE26191	gene_body	500490	501256	50041
scaffold_99	NVE26196	gene_body	566252	570480	243820
scaffold_99	NVE26201	gene_body	616722	619666	243823
scaffold_99	NVE26202	gene_body	621308	628431	110276
scaffold_99	NVE26203	gene_body	628833	642961	110259
scaffold_99	NVE26206	gene_body	674241	677205	No data
scaffold_99	NVE26219	gene_body	766683	773230	No data
scaffold_100	NVE423	gene_body	23356	28827	69985
scaffold_100	NVE427	gene_body	74919	89595	110404
scaffold_100	NVE436	gene_body	182546	194494	28633
scaffold_100	NVE437	gene_body	194605	202242	209013
scaffold_100	NVE445	gene_body	300306	334434	110368
scaffold_100	NVE456	gene_body	384080	409489	187372
scaffold_100	NVE475	gene_body	672383	675625	110360
scaffold_101	NVE513	gene_body	55457	61195	110560
scaffold_101	NVE545	gene_body	355199	359198	No data
scaffold_101	NVE547	gene_body	369829	377787	243898
scaffold_101	NVE568	gene_body	573223	598233	20131
scaffold_102	NVE604	gene_body	132319	140065	110829
scaffold_102	NVE607	gene_body	157856	169910	30004
scaffold_102	NVE620	gene_body	265342	277224	73970
scaffold_102	NVE621	gene_body	279816	297834	209174
scaffold_102	NVE629	gene_body	445737	452245	110891
scaffold_102	NVE633	gene_body	479447	480725	168297
scaffold_102	NVE637	gene_body	502493	504335	110884
scaffold_102	NVE639	gene_body	519326	525220	235182
scaffold_102	NVE652	gene_body	672279	684940	168315
scaffold_103	NVE699	gene_body	148976	158271	110912
scaffold_103	NVE713	gene_body	343228	358814	110975
scaffold_104	NVE789	gene_body	79263	93185	111153
scaffold_104	NVE803	gene_body	206581	218075	111222
scaffold_104	NVE815	gene_body	361292	365070	No data
scaffold_104	NVE818	gene_body	381146	412271	244010
scaffold_105	NVE856	gene_body	11826	19089	244014
scaffold_105	NVE867	gene_body	195993	203297	70517
scaffold_105	NVE875	gene_body	270574	299562	20971
scaffold_105	NVE896	gene_body	601234	619090	111433
scaffold_106	NVE930	gene_body	48858	55695	209422
scaffold_106	NVE944	gene_body	133667	137385	209435
scaffold_107	NVE1019	gene_body	82176	90591	70145
scaffold_107	NVE1033	gene_body	328816	347777	111783
scaffold_107	NVE1044	gene_body	532378	579623	111788
scaffold_107	NVE1050	gene_body	651460	687073	209554
scaffold_108	NVE1088	gene_body	345956	353934	232965
scaffold_108	NVE1091	gene_body	365629	367825	168557
scaffold_108	NVE1090	gene_body	358574	370764	168557
scaffold_108	NVE1109	gene_body	623278	624561	168568
scaffold_109	NVE1133	gene_body	1826	11855	244094
scaffold_109	NVE1136	gene_body	56176	64874	21219
scaffold_109	NVE1139	gene_body	90775	101365	244097
scaffold_109	NVE1141	gene_body	112017	117025	112056
scaffold_109	NVE1151	gene_body	256034	280341	209643
scaffold_109	NVE1156	gene_body	311524	336445	168601
scaffold_109	NVE1180	gene_body	627694	637491	187853
scaffold_109	NVE1184	gene_body	661744	672918	244124
scaffold_110	NVE1380	gene_body	2584	5675	No data
scaffold_110	NVE1401	gene_body	365852	374763	168652
scaffold_110	NVE1404	gene_body	394980	409023	244136
scaffold_110	NVE1406	gene_body	418474	426478	112329
scaffold_110	NVE1412	gene_body	481569	497483	227021
scaffold_110	NVE1413	gene_body	497784	520294	232979
scaffold_110	NVE1414	gene_body	521604	540898	112200
scaffold_110	NVE1419	gene_body	602053	603477	112198
scaffold_111	NVE1441	gene_body	8	10527	112409
scaffold_111	NVE1442	gene_body	11236	15360	No data
scaffold_111	NVE1449	gene_body	80596	83138	209747
scaffold_111	NVE1461	gene_body	153814	155875	244148
scaffold_111	NVE1464	gene_body	182983	201407	209762
scaffold_111	NVE1478	gene_body	364908	376906	11103
scaffold_111	NVE1486	gene_body	446138	454466	No data
scaffold_111	NVE1489	gene_body	502798	507236	No data
scaffold_111	NVE1493	gene_body	543148	544011	168689
scaffold_111	NVE1494	gene_body	545028	552892	No data
scaffold_111	NVE1498	gene_body	580009	588537	244165
scaffold_111	NVE1502	gene_body	655197	690757	20110
scaffold_112	NVE1520	gene_body	30062	41245	209813
scaffold_112	NVE1522	gene_body	71127	101365	112613
scaffold_112	NVE1527	gene_body	132436	140750	No data
scaffold_112	NVE1536	gene_body	208380	215702	209831
scaffold_112	NVE1539	gene_body	226501	235579	112507
scaffold_112	NVE1547	gene_body	328960	345713	20757
scaffold_112	NVE1555	gene_body	410930	432044	209854
scaffold_112	NVE1568	gene_body	574497	605943	30007
scaffold_112	NVE1570	gene_body	615147	626463	244196
scaffold_113	NVE1587	gene_body	65906	104088	168765
scaffold_113	NVE1600	gene_body	239614	245356	No data
scaffold_113	NVE1605	gene_body	405680	416168	244207
scaffold_114	NVE1660	gene_body	274182	289405	24582
scaffold_114	NVE1678	gene_body	477650	499084	209979
scaffold_114	NVE1682	gene_body	538049	553773	244236
scaffold_115	NVE1721	gene_body	182911	236289	20034
scaffold_115	NVE1726	gene_body	284940	294134	210013
scaffold_115	NVE1734	gene_body	333853	362627	244247
scaffold_115	NVE1738	gene_body	425973	435107	50190
scaffold_116	NVE1767	gene_body	38967	65015	113222
scaffold_116	NVE1768	gene_body	68097	84795	113115
scaffold_116	NVE1769	gene_body	92767	105145	244261
scaffold_116	NVE1774	gene_body	163513	194442	168885
scaffold_116	NVE1777	gene_body	219173	245457	168887
scaffold_116	NVE1779	gene_body	257503	271623	No data
scaffold_116	NVE1781	gene_body	283699	287119	168894
scaffold_116	NVE1816	gene_body	641860	646334	No data
scaffold_116	NVE1817	gene_body	646446	668630	113080
scaffold_117	NVE1832	gene_body	1640	7095	244285
scaffold_117	NVE1837	gene_body	47016	58957	168930
scaffold_117	NVE1841	gene_body	70716	80246	168935
scaffold_117	NVE1843	gene_body	93566	94080	113251
scaffold_117	NVE1844	gene_body	109136	118437	113279
scaffold_117	NVE1851	gene_body	164186	175667	No data
scaffold_117	NVE1862	gene_body	401296	422830	113345
scaffold_117	NVE1863	gene_body	425176	439960	20671
scaffold_117	NVE1879	gene_body	565970	586034	168974
scaffold_117	NVE1886	gene_body	642760	673359	168976
scaffold_118	NVE1918	gene_body	185054	198822	244323
scaffold_118	NVE1920	gene_body	249743	282863	210190
scaffold_118	NVE1921	gene_body	284854	292262	113436
scaffold_118	NVE1926	gene_body	370648	372282	50030
scaffold_118	NVE1923	gene_body	314720	385088	50030
scaffold_118	NVE1948	gene_body	568705	585056	244342
scaffold_118	NVE1952	gene_body	605621	617744	113524
scaffold_119	NVE1983	gene_body	156793	171845	244354
scaffold_119	NVE1990	gene_body	217703	223667	244361
scaffold_119	NVE1999	gene_body	282593	284447	169077
scaffold_119	NVE2015	gene_body	410413	424277	59266
scaffold_120	NVE2266	gene_body	159564	173791	188332
scaffold_120	NVE2268	gene_body	194084	203008	50814
scaffold_120	NVE2270	gene_body	209764	214738	244394
scaffold_120	NVE2276	gene_body	247844	258693	244399
scaffold_120	NVE2288	gene_body	520178	539602	210365
scaffold_121	NVE2306	gene_body	8596	10050	No data
scaffold_121	NVE2315	gene_body	73566	93199	113931
scaffold_121	NVE2325	gene_body	220623	231503	113913
scaffold_121	NVE2334	gene_body	378172	384735	210420
scaffold_121	NVE2336	gene_body	418992	436456	235286
scaffold_121	NVE2349	gene_body	616288	633080	233040
scaffold_122	NVE2362	gene_body	17706	34976	50409
scaffold_122	NVE2389	gene_body	437087	452611	114090
scaffold_122	NVE2396	gene_body	540191	544586	188457
scaffold_122	NVE2397	gene_body	550566	580120	11286
scaffold_122	NVE2402	gene_body	649446	655717	113994
scaffold_123	NVE2431	gene_body	344344	357076	233044
scaffold_123	NVE2434	gene_body	381044	416558	244480
scaffold_123	NVE2435	gene_body	420505	427783	28519
scaffold_123	NVE2436	gene_body	431295	483833	114137
scaffold_124	NVE2476	gene_body	103203	109465	No data
scaffold_124	NVE2494	gene_body	278324	289458	23431
scaffold_124	NVE2495	gene_body	295644	315368	169317
scaffold_124	NVE2508	gene_body	481182	502363	114271
scaffold_124	NVE2511	gene_body	523904	535387	244522
scaffold_124	NVE2517	gene_body	608944	625893	58074
scaffold_125	NVE2533	gene_body	44247	61055	210633
scaffold_125	NVE2557	gene_body	375356	380100	227080
scaffold_125	NVE2562	gene_body	424781	442849	114380
scaffold_126	NVE2579	gene_body	4308	8045	244537
scaffold_126	NVE2583	gene_body	43426	52970	244542
scaffold_126	NVE2599	gene_body	156730	170014	244547
scaffold_126	NVE2605	gene_body	220579	233829	244550
scaffold_126	NVE2609	gene_body	246470	253997	233056
scaffold_126	NVE2613	gene_body	277160	288619	169387
scaffold_126	NVE2621	gene_body	352703	363323	114516
scaffold_126	NVE2643	gene_body	560267	567361	114504
scaffold_127	NVE2699	gene_body	280730	283119	188665
scaffold_127	NVE2712	gene_body	360206	363977	114647
scaffold_127	NVE2713	gene_body	364777	373567	235323
scaffold_127	NVE2731	gene_body	514672	545616	33539
scaffold_127	NVE2736	gene_body	581178	588881	114712
scaffold_128	NVE2750	gene_body	12626	19080	210817
scaffold_128	NVE2754	gene_body	56339	86725	210822
scaffold_128	NVE2766	gene_body	205572	220012	244615
scaffold_128	NVE2774	gene_body	341079	343577	210850
scaffold_128	NVE2792	gene_body	566091	567720	114899
scaffold_129	NVE2832	gene_body	156862	165745	114974
scaffold_129	NVE2840	gene_body	258823	261594	No data
scaffold_129	NVE2843	gene_body	286518	293601	114942
scaffold_129	NVE2844	gene_body	319628	323295	115100
scaffold_130	NVE3113	gene_body	106017	128225	No data
scaffold_130	NVE3120	gene_body	258255	265302	115285
scaffold_130	NVE3123	gene_body	278683	288597	230013
scaffold_130	NVE3144	gene_body	453623	460482	244685
scaffold_130	NVE3155	gene_body	576477	580235	No data
scaffold_130	NVE3156	gene_body	589997	592155	115275
scaffold_131	NVE3215	gene_body	475293	524406	244707
scaffold_131	NVE3219	gene_body	542244	563952	188910
scaffold_132	NVE3241	gene_body	39496	54290	115506
scaffold_132	NVE3243	gene_body	62496	63890	115577
scaffold_132	NVE3252	gene_body	169936	179180	No data
scaffold_132	NVE3261	gene_body	233772	236360	211086
scaffold_132	NVE3263	gene_body	240879	245592	29324
scaffold_132	NVE3279	gene_body	383597	386671	244736
scaffold_132	NVE3298	gene_body	545251	549830	115460
scaffold_133	NVE3323	gene_body	90506	94260	244762
scaffold_133	NVE3328	gene_body	129341	156905	169781
scaffold_133	NVE3353	gene_body	324849	352027	211175
scaffold_133	NVE3360	gene_body	429666	437597	No data
scaffold_133	NVE3363	gene_body	455327	462135	235366
scaffold_133	NVE3366	gene_body	487246	505764	115662
scaffold_134	NVE3400	gene_body	153427	180005	230057
scaffold_134	NVE3403	gene_body	189767	194185	244799
scaffold_134	NVE3424	gene_body	528350	548985	115857
scaffold_135	NVE3459	gene_body	264156	297036	115977
scaffold_135	NVE3463	gene_body	322516	325853	211292
scaffold_135	NVE3467	gene_body	347622	377836	189113
scaffold_135	NVE3469	gene_body	382116	386836	No data
scaffold_136	NVE3521	gene_body	223645	232339	211340
scaffold_136	NVE3528	gene_body	342436	349914	211349
scaffold_136	NVE3529	gene_body	350015	380333	116184
scaffold_136	NVE3536	gene_body	435766	479050	169949
scaffold_136	NVE3538	gene_body	495188	498545	169949
scaffold_136	NVE3539	gene_body	510567	520355	15147
scaffold_136	NVE3544	gene_body	570343	598562	211371
scaffold_137	NVE3561	gene_body	83006	103670	230076
scaffold_137	NVE3571	gene_body	242075	277480	116282
scaffold_137	NVE3574	gene_body	314020	327414	25995
scaffold_138	NVE3613	gene_body	84117	106405	No data
scaffold_138	NVE3620	gene_body	161586	167922	244885
scaffold_138	NVE3622	gene_body	190490	200984	244887
scaffold_138	NVE3632	gene_body	297185	316139	189228
scaffold_138	NVE3639	gene_body	356260	360456	189235
scaffold_138	NVE3647	gene_body	432378	436269	211467
scaffold_138	NVE3651	gene_body	461380	464628	211472
scaffold_138	NVE3656	gene_body	509269	516745	58482
scaffold_139	NVE3705	gene_body	112306	130170	211503
scaffold_139	NVE3707	gene_body	133607	145675	244918
scaffold_139	NVE3723	gene_body	286725	292729	No data
scaffold_139	NVE3728	gene_body	342329	349484	211529
scaffold_139	NVE3739	gene_body	425374	440772	74776
scaffold_139	NVE3754	gene_body	552814	561312	24420
scaffold_140	NVE3935	gene_body	61316	77960	244954
scaffold_140	NVE3937	gene_body	86146	94026	116697
scaffold_140	NVE3953	gene_body	312503	313559	No data
scaffold_140	NVE3960	gene_body	379325	394213	26201
scaffold_140	NVE3971	gene_body	508112	513087	244968
scaffold_141	NVE4002	gene_body	1980	5865	170128
scaffold_141	NVE4007	gene_body	132407	163915	116745
scaffold_141	NVE4010	gene_body	176016	190495	244980
scaffold_141	NVE4035	gene_body	427875	434380	244995
scaffold_142	NVE4108	gene_body	303096	309130	25465
scaffold_142	NVE4124	gene_body	476014	492902	116873
scaffold_143	NVE4177	gene_body	251009	256618	170252
scaffold_144	NVE4208	gene_body	30113	46205	117166
scaffold_144	NVE4209	gene_body	46878	50145	189485
scaffold_144	NVE4219	gene_body	144187	166835	117131
scaffold_144	NVE4234	gene_body	329072	349468	245069
scaffold_144	NVE4244	gene_body	428926	431405	211826
scaffold_144	NVE4245	gene_body	432797	444405	211827
scaffold_144	NVE4255	gene_body	501857	508555	117138
scaffold_145	NVE4282	gene_body	16126	31550	211841
scaffold_145	NVE4287	gene_body	100816	116385	211848
scaffold_145	NVE4291	gene_body	127797	132315	No data
scaffold_145	NVE4294	gene_body	183289	194640	211856
scaffold_145	NVE4313	gene_body	391441	399544	245101
scaffold_146	NVE4355	gene_body	82637	95665	957
scaffold_146	NVE4358	gene_body	161146	169978	211915
scaffold_146	NVE4359	gene_body	169985	178715	211916
scaffold_146	NVE4366	gene_body	242685	265229	117471
scaffold_146	NVE4369	gene_body	311505	325514	211930
scaffold_146	NVE4375	gene_body	398151	405971	117404
scaffold_147	NVE4410	gene_body	20997	39795	117504
[truncated: 2,190 more rows]
