# Supplementary material for: Cnidarian hair cell development illuminates an ancient role for the class IV POU transcription factor in defining mechanoreceptor identity
Source: eLife. 2021 Dec 23;10:e74336. doi: 10.7554/eLife.74336 (PMC8846589; doi:10.7554/eLife.74336)
Supplement: Supplementary file 2. [file elife-74336-supp2.xlsx]

## Sheet: Sheet 1 - downregulated_genes
downregulated_genes
gene	fold_change	mean_counts	pvalue	JGI_ID
NVE10005	-1.55558	24.0653	6.35367e-05	246627
NVE10079	-2.32145	29.6023	1.22926e-12	No data
NVE10097	-0.352817	609.775	0.0079834	126489
NVE10098	-0.96918	22.0941	0.00162113	No data
NVE10237	-1.30127	24.215	7.48585e-05	215748
NVE10252	-4.45017	259.207	2.00005e-51	127428
NVE10337	-2.67822	4.08905	0.000691086	200817
NVE10356	-0.349849	408.85	0.00786761	200840
NVE10357	-0.331732	326.713	0.0021206	90602
NVE10564	-0.833155	16.7286	0.00474749	246802
NVE10634	-0.46283	510.339	6.88428e-05	No data
NVE10859	-0.324937	160.618	0.00638815	240153
NVE10861	-2.23067	7.89157	0.000186051	90908
NVE10875	-0.660819	202.465	1.80859e-06	161891
NVE10898	-2.43141	509.359	7.75268e-36	240186
NVE10998	-1.14731	43.1983	1.59311e-06	128668
NVE10999	-1.21486	109.671	4.99884e-09	216224
NVE11003	-3.3384	15.5315	2.01519e-08	No data
NVE11038	-3.0096	91.2212	6.86519e-19	128741
NVE11058	-5.49121	149.643	4.41924e-35	128772
NVE11189	-0.581703	89.4214	0.000720141	ENSRNA022755290
NVE11310	-3.85591	7.40812	4.03391e-06	201172
NVE11392	-2.65787	15.3654	5.71047e-06	No data
NVE1147	-1.10761	287.672	2.59722e-11	27156
NVE11524	-4.48952	7.9735	2.07864e-06	129339
NVE11525	-0.0728063	2.22617	0.0025191	56135
NVE11581	-2.10802	7.69479	0.000662366	247064
NVE11585	-0.745604	13.2175	0.00660024	129471
NVE11586	-0.794706	21.1741	0.00320695	129459
NVE11709	-0.385458	89.4445	0.00758884	No data
NVE11748	-1.14716	1695.25	1.60577e-07	91324
NVE11749	-3.54474	84.8062	1.5204e-25	91692
NVE11870	-1.32497	119.877	1.62774e-09	129955
NVE11877	-1.59717	28.7259	6.15982e-08	247137
NVE11886	-0.429545	211.695	0.000340977	No data
NVE12020	-2.09372	30.4519	3.05663e-06	130363
NVE12025	-0.822774	27.292	0.00167493	247200
NVE12047	-2.62761	43.4037	4.39053e-14	216955
NVE12063	-0.912237	73.9607	2.43139e-06	130406
NVE12065	-3.94766	22.2897	1.2646e-11	130395
NVE12141	-0.364562	1013.73	0.00131571	30268
NVE12183	-0.408442	1060.4	0.00484511	65317
NVE12187	-0.206044	5.51589	0.00242226	No data
NVE12189	-2.10687	10.9521	6.78847e-05	201513
NVE12358	-1.7358	6.73281	0.00126188	No data
NVE12464	-2.02541	7.12648	0.000252436	223501
NVE12479	-2.7471	9.65212	9.66095e-06	92082
NVE12482	-0.267119	5.68394	0.00406474	92262
NVE12483	-3.7889	9.46961	5.49775e-07	92266
NVE12652	-0.821634	24.4404	0.0017155	131315
NVE12658	-0.678817	128.721	0.000168843	223528
NVE12661	-2.45228	9.26195	2.33134e-05	131398
NVE12662	-1.85375	6.92769	0.000784696	131398
NVE12748	-0.511134	178.29	0.00282991	174288
NVE1276	-1.57423	241.678	4.46616e-10	No data
NVE1277	-1.46462	37.4028	2.04127e-08	198676
NVE1278	-1.23026	13.1947	0.00137434	85625
NVE12832	-0.969979	57.4481	1.06413e-05	No data
NVE12924	-0.680087	693.815	6.24655e-06	196786
NVE12948	-2.44871	11.504	1.38564e-05	63302
NVE12981	-0.657294	411.922	1.62049e-06	158359
NVE13049	-1.38939	22.9482	5.46157e-05	201652
NVE13074	-0.483765	66.0917	0.00859603	201686
NVE13075	-1.48022	110.333	6.41807e-15	92483
NVE13098	-1.02775	81.6302	2.49158e-07	No data
NVE13105	-3.10735	63.9082	1.65264e-25	240477
NVE13116	-0.433275	217.417	0.000484077	92366
NVE13207	-0.369999	121.776	0.00572535	12988
NVE13208	-0.578777	130.82	0.000873772	131788
NVE13272	-0.599303	257.385	0.000285642	131887
NVE13276	-0.660009	22.9202	0.00502915	217560
NVE13277	-0.730436	994.19	1.14452e-06	10122
NVE13383	-1.8888	19.8165	5.78049e-07	217642
NVE13384	-1.56537	23.2718	1.7811e-05	217642
NVE13385	-4.0243	63.8838	6.12008e-34	217643
NVE13461	-0.87838	35.0548	0.000114323	132356
NVE135	-0.428071	167.543	0.00552406	196234
NVE13502	-1.08519	71.2132	1.46397e-07	201851
NVE13676	-0.589409	39.4788	0.00857754	41385
NVE13828	-0.503752	126.883	0.000689854	247591
NVE13841	-0.346632	581.787	0.00676045	60834
NVE13901	-1.45546	41.913	3.79432e-08	93322
NVE13928	-0.363486	90.8129	0.00982048	No data
NVE14189	-0.0688841	1.75796	0.0048288	202172
NVE14190	-0.2748	511.358	0.00635385	202173
NVE14201	-0.370921	22793.3	0.00683026	234494
NVE14207	-1.2151	30.9467	0.00020935	202189
NVE14351	-0.595093	20.6969	0.00841414	134186
NVE1444	-0.485224	257.362	8.75122e-05	227023
NVE14441	-3.28522	5.56483	9.65458e-05	223808
NVE14446	-0.456935	118.165	0.00263772	218222
NVE14465	-1.0735	157.47	5.11493e-09	No data
NVE14499	-0.925406	27.5137	0.000237553	No data
NVE14521	-2.43541	22.2637	5.02716e-10	No data
NVE1461	-0.595605	64.2872	0.00117483	244148
NVE14742	-0.547097	108.192	0.000698393	194134
NVE14757	-1.24291	36.2782	8.64463e-06	40806
NVE14758	-2.90924	19.6375	1.90556e-11	40919
NVE14851	-0.442744	58.0644	0.00612092	No data
NVE1486	-2.21242	163.841	2.39165e-38	No data
NVE1489	-1.76441	61.6297	1.95209e-11	No data
NVE14933	-0.408721	525.7	0.0099691	234521
NVE1494	-4.45306	189.317	5.67124e-44	No data
NVE1495	-4.09067	379.071	3.96963e-72	No data
NVE14954	-1.28117	132.125	2.19026e-08	135045
NVE15020	-1.79696	125.446	1.40527e-22	218539
NVE15022	-2.15436	11.1063	2.0134e-05	No data
NVE15023	-1.60085	189.306	4.25247e-20	135278
NVE15070	-1.86963	25.959	7.25621e-06	135421
NVE15071	-3.11373	75.8602	6.6466e-23	18391
NVE15073	-0.985605	16.667	0.0024862	No data
NVE15109	-0.0982427	3.0523	0.00657495	14027
NVE15110	-3.1176	9.35783	1.04046e-05	135550
NVE15182	-0.614709	364.527	0.000175333	59988
NVE15196	-5.09558	61.8986	6.08424e-30	202575
NVE15197	-0.0900581	2.12569	0.00137165	202576
NVE15332	-0.443422	160.299	0.00100982	218759
NVE15334	-0.584366	279.825	4.67403e-05	135889
NVE15383	-0.708136	37.8599	0.002098	136007
NVE15401	-0.250262	742.822	0.0094427	247874
NVE15413	-0.547183	63.8744	0.00177076	240906
NVE1544	-1.5442	182.085	1.42166e-12	112546
NVE15449	-1.48351	11.1072	0.000481412	94651
NVE15473	-0.588205	47.1743	0.00503123	202690
NVE15517	-1.46719	44.6892	4.53076e-08	163167
NVE15527	-1.36464	14.6493	0.000498481	61624
NVE15528	-1.04777	39.4131	0.00126206	94679
NVE15617	-0.546673	337.292	0.000102342	247892
NVE15694	-0.775326	12.9396	0.00732336	248846
NVE1571	-0.429644	165.156	0.00457158	209875
NVE15814	-1.18811	10.7879	0.00223939	No data
NVE15836	-3.34212	21.4986	6.50886e-10	202855
NVE15847	-0.455396	46.8368	0.00904811	202865
NVE15867	-1.45839	10.2476	0.00113941	241048
NVE15868	-0.892194	86.1489	1.1422e-06	202891
NVE159	-1.59482	9.70489	0.00101955	196263
NVE15933	-1.88688	10.5142	0.000132859	247953
NVE160	-3.28458	137.266	9.65097e-07	196263
NVE16015	-3.52998	109.384	1.10254e-07	247995
NVE16043	-1.68357	18.4724	1.77115e-06	No data
NVE16045	-2.1518	24.7913	1.8388e-08	137052
NVE16046	-2.15104	41.3681	1.09519e-14	5341
NVE1605	-1.16142	594.994	6.78208e-07	244207
NVE16072	-3.73385	48.6294	1.13031e-21	No data
NVE161	-2.27187	15.3066	4.53466e-05	196264
NVE16120	-0.152268	12.9097	0.000747788	203005
NVE16297	-0.629518	2150.53	0.00503909	39805
NVE16337	-1.0261	213.771	5.78169e-11	238169
NVE16490	-1.45398	227.187	2.06944e-18	81233
NVE16491	-0.880092	43.7288	0.000196935	81637
NVE16494	-0.461067	55.1925	0.005933	60020
NVE1662	-0.92665	16.8208	0.00130261	209965
NVE16823	-1.30931	39.9065	7.68151e-05	No data
NVE16848	-0.962859	15.6006	0.00186615	203229
NVE16880	-1.92976	47.6505	1.70104e-07	No data
NVE16899	-0.85058	65.3169	8.70418e-05	219438
NVE16943	-3.46344	5.11287	0.000318922	219466
NVE170	-0.848343	9.39217	0.00767493	237787
NVE17011	-0.79427	32.7713	0.000887695	42930
NVE17021	-2.54064	8.32466	4.71632e-05	137994
NVE17022	-5.22936	7.72838	7.80398e-07	137994
NVE17023	-0.189551	8.48955	0.00939454	137994
NVE17057	-1.9287	19.1476	4.19181e-05	96136
NVE17068	-0.461012	46.5325	0.00767514	182833
NVE17104	-0.263615	664.98	0.0091206	96324
NVE17233	-0.697306	54.718	0.000746259	219625
NVE17239	-0.898658	27.4804	0.00213703	248134
NVE17251	-3.16975	6.79014	3.23166e-05	219646
NVE17286	-2.45551	20.3631	2.09635e-09	No data
NVE17287	-2.9519	8.01331	5.16885e-05	No data
NVE17309	-0.561032	157.582	7.3197e-05	163663
NVE17370	-1.32659	81.1458	1.2025e-08	203489
NVE17559	-0.598672	208.011	5.99098e-06	248172
NVE17561	-0.674863	142.718	2.95747e-05	47418
NVE17658	-2.32117	36.4789	3.50261e-11	241382
NVE17685	-0.381282	1414.32	6.8648e-05	174
NVE17700	-1.47294	141.974	8.85591e-09	96797
NVE17701	-2.22212	208.232	9.97173e-34	96874
NVE17811	-0.508513	88.0492	0.00137748	60191
NVE17821	-0.507854	118.36	0.00222289	97297
NVE17822	-1.10241	8.6875	0.0041733	53909
NVE180	-0.896785	480.493	6.0289e-07	No data
NVE18003	-0.118453	3.01384	0.000236442	No data
NVE18010	-1.4043	21.6371	0.000102555	241459
NVE18050	-1.04062	82.5791	1.19886e-07	203853
NVE18051	-0.483233	567.478	8.27714e-05	164057
NVE18161	-0.498656	203.273	0.00105849	219985
NVE18226	-1.50035	44.4601	1.2964e-09	248233
NVE18231	-1.55648	29.0234	7.85737e-07	No data
NVE18331	-0.847555	180.446	2.79675e-05	234654
NVE18395	-2.54768	18.5929	3.68894e-08	220085
NVE18474	-0.323625	262.909	0.00781183	98014
NVE18475	-0.631364	200.622	8.65306e-06	No data
NVE185	-3.08678	24.968	2.56062e-09	60804
NVE18574	-0.803291	9.05669	0.00756854	3496
NVE18576	-0.686187	21.735	0.0039407	139608
NVE18595	-3.3	7.17523	4.58822e-05	139655
NVE18816	-0.645025	240.316	1.4419e-05	220271
NVE18817	-1.94733	128.158	1.07118e-22	139887
NVE1882	-1.33647	6.81543	0.00250961	113283
NVE18938	-2.42445	17.6711	2.19897e-08	No data
NVE18949	-0.601001	125.783	0.000465279	197268
NVE18950	-2.0534	8.50876	0.000139781	No data
NVE18953	-1.82751	107.401	2.0256e-08	No data
NVE18973	-0.612225	87.5411	0.00623508	238353
NVE18975	-2.4663	132.493	1.07039e-31	82227
NVE19	-0.225532	847.959	0.00960353	79108
NVE19015	-5.25571	76.449	1.74324e-32	197339
NVE19023	-0.688499	16.7183	0.00754307	197347
NVE19042	-0.747451	26.4687	0.00218613	158857
NVE19127	-1.0657	59.8756	9.40529e-05	197466
NVE19182	-0.856188	425.24	9.83101e-08	204357
NVE19204	-3.66795	22.7561	1.33938e-13	204381
NVE19226	-2.87666	9.54134	1.97961e-06	No data
NVE19227	-2.64028	21.5769	2.48546e-11	98484
NVE19345	-2.01859	36.6393	3.92575e-12	204434
NVE19357	-0.431688	154.313	0.00109557	204447
NVE19361	-1.48673	157.032	5.63199e-14	98897
NVE19371	-4.06783	40.2868	6.59295e-22	No data
NVE19423	-6.79028	47.5071	9.05612e-17	No data
NVE19482	-0.948504	133.476	2.22845e-06	No data
NVE19483	-1.2284	224.059	1.43984e-08	140357
NVE19484	-0.615484	159.762	0.00165474	220404
NVE19488	-0.163349	5.62169	0.00876408	57075
NVE19521	-2.13607	17.2386	3.34637e-07	204550
NVE19553	-1.06483	26.8076	0.000207514	99126
NVE19607	-0.668014	91.7287	0.000223672	99167
NVE19694	-0.987611	21.8116	0.00188308	220479
NVE19696	-0.421268	1511.24	0.00189822	237634
NVE19737	-0.396136	633.169	0.000976831	241879
NVE19767	-1.14912	12.0693	0.00123159	No data
NVE19774	-0.961823	19.5759	0.00126547	No data
NVE19826	-0.111098	2.8806	0.0056471	204789
NVE19867	-2.58881	18.1427	3.70803e-07	No data
NVE19915	-0.746841	28.546	0.00272277	204809
NVE19959	-0.802224	32.5605	0.00190434	204856
NVE19980	-1.6503	55.2769	3.12628e-11	24362
NVE20027	-0.775418	21.545	0.00630676	No data
NVE20065	-2.84194	100.598	7.96713e-17	140859
NVE20083	-1.66716	16.6911	8.21888e-05	100075
NVE20107	-0.478363	549.547	0.000178417	242002
NVE20265	-1.10743	15.0597	0.00206188	220684
NVE20352	-0.449747	393.095	0.00216893	100237
NVE20361	-1.80396	33.2149	1.88394e-07	12872
NVE20457	-2.33453	18.1501	2.99695e-07	No data
NVE20488	-1.15995	55.3719	3.83692e-07	205215
NVE20489	-0.908569	54.6231	6.62416e-05	205215
NVE20547	-1.66353	40.8647	3.89981e-07	233796
NVE2055	-0.721469	73.4968	0.000389819	86018
NVE2056	-1.39458	28.5596	0.000283237	85827
NVE20750	-0.179919	6.7645	0.0037765	No data
NVE2081	-2.76293	75.832	3.14455e-18	239118
NVE20918	-2.04654	59.2356	6.83055e-15	No data
NVE20937	-0.334455	152.748	0.00923392	238488
NVE20954	-0.915898	38.9523	0.000218282	238501
NVE2103	-6.15584	13.3343	6.12868e-09	85719
NVE21040	-1.43195	54.7232	1.24821e-08	238559
NVE21073	-1.28479	55.0657	3.15916e-08	No data
NVE21074	-1.25785	73.7917	2.03563e-08	82974
NVE21075	-1.38819	128.23	1.34935e-11	82509
NVE21081	-2.42929	38.4895	1.06207e-09	No data
NVE21082	-0.466069	76.4735	0.00413146	197698
NVE21139	-0.929102	89.4878	5.87557e-06	No data
NVE21233	-0.711988	98.583	0.000424799	229212
NVE21249	-1.57568	80.9474	5.693e-11	101764
NVE21294	-1.72178	64.5359	6.60538e-10	205658
NVE2134	-0.477407	57.539	0.00556163	160170
NVE2142	-1.0109	92.8145	2.31009e-05	35366
NVE21425	-2.42996	96.5866	1.36076e-20	205746
NVE21438	-0.862875	23.9179	0.00119923	101859
NVE2144	-0.622579	28.5772	0.00630874	No data
NVE21509	-0.722614	67.7778	0.000161059	205808
NVE2155	-3.53122	5.56423	0.000131286	31824
NVE2156	-3.02645	72.6886	8.91725e-31	85724
NVE21616	-2.45651	32.4385	8.82259e-09	102323
NVE21628	-1.13391	327.208	3.57977e-13	76387
NVE2168	-1.55284	58.051	1.49277e-09	85928
NVE21764	-0.347144	215.247	0.00430062	102520
NVE2179	-0.494285	191.121	0.00224862	198924
NVE21804	-0.638875	79.7135	0.00239885	No data
NVE2182	-0.667951	15.9537	0.00653346	198927
NVE21832	-0.683132	31.1477	0.00355764	No data
NVE21877	-0.315326	622.851	0.00516372	206093
NVE21884	-0.560846	102.757	0.000536401	58280
NVE21922	-0.702387	20.133	0.00444149	40863
NVE21927	-0.864654	77.5422	0.00015022	No data
NVE2194	-1.28881	174.962	7.03378e-07	160201
NVE22007	-2.92818	44.7899	6.06135e-19	103153
NVE22046	-1.87423	22.7337	3.09146e-06	No data
NVE22072	-1.73547	15.6417	1.59923e-05	103062
NVE22155	-0.665021	17.9802	0.0061159	206332
NVE22283	-0.836294	27.4727	0.00232699	50846
NVE22292	-0.242706	4888.5	0.00821155	229336
NVE22380	-3.7807	30.066	4.48805e-17	238609
NVE22390	-2.406	38.2695	1.3773e-11	No data
NVE22451	-0.479511	582.073	0.000102563	83556
NVE22454	-2.47874	11.5687	1.86825e-06	83339
NVE22456	-0.817371	38.7187	0.000922027	83487
NVE22512	-4.85911	7.20013	6.10581e-06	197880
NVE22513	-1.27406	86.6218	7.3939e-06	83526
NVE22596	-0.806462	33.7293	0.0020514	44401
NVE22714	-4.62874	92.605	6.2607e-41	No data
NVE22741	-2.57723	93.6353	8.12634e-22	104037
NVE2280	-2.61727	36.4725	6.80917e-13	113816
NVE22845	-0.610963	20.4633	0.00741814	225046
NVE22869	-1.79978	9.1109	0.000798501	104327
NVE22966	-1.44079	19.1914	5.90431e-05	No data
NVE22968	-0.838747	23.0527	0.00204447	104623
NVE22991	-1.12355	47.3816	8.17499e-07	104479
NVE23085	-1.09308	10.4424	0.00261288	No data
NVE23123	-0.607828	58.2161	0.00302342	No data
NVE2324	-2.65232	4.66943	0.000753416	113867
NVE23349	-1.39815	27.1013	4.92907e-05	104943
NVE23364	-1.30118	174.699	2.88782e-16	No data
NVE2339	-0.727135	90.2043	0.000220751	210434
NVE2362	-2.08731	37.0756	1.08565e-08	50409
NVE23756	-2.60408	30.6487	2.81557e-10	248888
NVE23788	-3.26961	64.856	3.21482e-06	243076
NVE23852	-1.05441	33.8719	4.46349e-05	No data
NVE23923	-1.0166	23.6761	0.000849493	238729
NVE23964	-2.8925	34.8267	1.52736e-12	83827
NVE2398	-0.487489	280.926	0.000233024	210496
NVE24026	-1.50185	8.75367	0.00131655	198093
NVE24039	-1.74932	78.6713	3.81183e-13	198106
NVE24088	-0.873902	15.946	0.00329881	No data
NVE24091	-1.59056	80.2016	0.00109937	238806
NVE24136	-0.0631416	2.09705	0.00415949	No data
NVE24166	-4.50738	32.5173	2.05954e-18	207417
NVE24215	-0.379141	268.569	0.00177354	106212
NVE24279	-2.83912	13.3807	2.88509e-08	No data
NVE24288	-1.39925	132.913	1.80472e-11	32269
NVE24293	-1.49684	49.7671	6.06599e-06	No data
NVE2430	-1.70036	24.809	1.78548e-06	114111
NVE2432	-0.649042	59.2688	0.0019214	No data
NVE24333	-1.1203	9.81049	0.00285816	6197
NVE24336	-3.57814	39.954	2.70721e-19	225315
NVE24337	-3.72527	41.6966	1.61253e-16	225315
NVE24398	-0.438877	88.6065	0.00267912	232789
NVE244	-2.35933	256.639	8.46659e-41	No data
NVE24403	-0.670829	271.172	0.000115403	207612
NVE24522	-0.445521	139.625	0.00225416	243260
NVE24543	-2.9443	57.0028	9.00974e-19	207733
NVE24544	-0.273953	592.385	0.00710145	243274
NVE2456	-0.454651	563.085	0.000778832	No data
NVE24569	-0.630311	14.9951	0.00902986	221557
NVE24596	-0.990281	41.4115	0.000225486	73945
NVE24603	-6.28405	14.9717	2.0894e-09	No data
NVE24622	-3.46057	78.0903	2.46087e-35	207789
NVE24708	-0.311329	443.541	0.00692671	243313
NVE24831	-0.574357	35.3458	0.00630045	186588
NVE24888	-2.99295	37.8466	6.59511e-17	107649
NVE24983	-2.06192	17.4318	1.23021e-06	107944
NVE2500	-0.656725	193.4	3.01171e-05	114299
NVE25007	-0.733659	231.289	2.48425e-05	20238
NVE2501	-0.635201	782.058	1.82813e-06	114299
NVE25127	-0.693492	67.4491	0.000460294	243483
NVE2514	-2.55982	110.305	1.07286e-29	114289
NVE25179	-0.5094	310.188	0.00290047	248647
NVE25219	-0.633396	220.424	0.00415687	60642
NVE25239	-0.899081	55.2091	0.000196833	238863
NVE25279	-0.603538	54.7323	0.00122269	238886
NVE25298	-2.09664	47.9379	1.46483e-14	84427
NVE253	-1.1081	358.829	3.82402e-07	196376
NVE25407	-0.772557	25.4472	0.00251448	221670
NVE25427	-0.176503	4.00257	0.00100019	221676
NVE25475	-1.08842	56.4749	4.16757e-07	208349
NVE25496	-1.88131	726.959	2.06207e-35	21107
NVE25498	-1.19872	619.621	4.08266e-06	208381
NVE25528	-0.822762	42.1497	0.00154814	9326
NVE25583	-0.54813	64.3809	0.00147667	167758
NVE25590	-0.700598	113.297	2.77524e-05	No data
NVE25612	-0.738293	41.8921	0.00133234	208481
NVE25773	-0.437953	140.437	0.00413213	243657
NVE25860	-0.108911	3.27266	0.00162313	109596
NVE25885	-0.750109	14.7011	0.00608745	208679
NVE25893	-1.21161	17.5587	0.000805369	208687
NVE25918	-0.171157	4.94532	0.0026334	No data
NVE26	-0.741571	471.639	2.70092e-09	237703
NVE26033	-1.7024	46.7837	2.32497e-10	208825
NVE26093	-0.485473	143.826	0.00148415	208887
NVE26153	-1.11944	42.3114	3.21075e-05	No data
NVE26170	-2.01846	16.0257	1.96088e-06	110254
NVE26171	-0.324346	200.813	0.00902638	243811
NVE26201	-0.427578	179.441	0.00179253	243823
NVE26205	-1.53185	242.283	1.03614e-14	51194
NVE264	-1.39744	21.4964	3.0639e-05	No data
NVE265	-0.644949	312.282	0.000816895	No data
NVE2712	-0.663053	24.7435	0.00318358	114647
NVE2721	-2.27382	8.5491	5.50671e-05	114697
NVE2760	-1.76662	15.3318	0.000732099	244611
NVE2762	-3.04267	24.628	1.38341e-11	244611
NVE2763	-0.547765	107.843	0.00322411	114900
NVE2769	-1.80782	11.3975	4.8568e-05	No data
NVE2771	-0.274789	7.56	0.00510778	114911
NVE2959	-0.466517	971.864	0.00284814	199073
NVE2985	-0.633042	96.6903	0.000425328	239271
NVE3009	-0.932208	36.7912	0.00170543	231991
NVE3047	-0.52913	160.386	0.0014881	86565
NVE3048	-0.843264	199.744	2.71719e-08	86565
NVE3072	-2.48942	52.2802	6.09456e-19	199202
NVE3130	-1.42679	37.9326	1.24299e-05	210976
NVE3169	-0.559435	123.601	0.000224616	115361
NVE3207	-2.72749	5.21738	0.000280109	211047
NVE3300	-0.467864	413.443	0.00148262	115565
NVE337	-0.99488	15.5688	0.0014043	198502
NVE3410	-2.83379	110.729	7.65162e-37	211237
NVE3436	-0.234682	837.915	0.00786724	52979
NVE3483	-2.65454	94.59	5.80324e-23	211310
NVE3484	-3.3811	4.32656	0.000260301	211311
NVE3525	-2.0674	10.2831	4.75144e-05	116214
NVE3539	-1.39352	10.6741	0.000515342	15147
NVE3594	-0.685358	306.603	2.11769e-06	116374
NVE3605	-2.18407	26.6451	1.21438e-07	No data
NVE3646	-0.400993	187.908	0.0025221	230093
NVE3726	-0.913298	238.353	5.54567e-07	244930
NVE3778	-1.47427	191.199	3.7599e-11	No data
NVE3790	-1.6642	5.79635	0.00217997	239358
NVE3791	-2.42846	18.8226	5.66995e-07	239358
NVE3813	-1.48827	89.8111	6.33065e-11	199281
NVE3823	-0.440321	477.539	0.002404	63580
NVE3825	-1.53637	275.163	5.0753e-26	87003
NVE3922	-0.353832	542.913	0.00409522	160653
NVE3936	-0.446075	193.888	0.00137648	No data
NVE3963	-2.31576	25.2634	8.22861e-10	No data
NVE4022	-0.103079	2.66773	0.00291046	No data
NVE4023	-5.8994	11.5693	4.26826e-08	211633
NVE4080	-0.682366	113.107	0.00119107	116985
NVE4205	-2.86242	77.8235	1.84737e-22	211784
NVE4226	-0.80547	113.283	0.000557285	No data
NVE426	-1.44739	74.2102	8.09826e-08	110350
NVE4260	-2.04815	123.693	6.90903e-24	211838
NVE4432	-0.48489	1161.64	0.00129143	189628
NVE4438	-1.17459	27.6505	0.00057112	No data
NVE4454	-2.54337	61.4926	5.00531e-16	No data
NVE4530	-0.405228	150.025	0.00825565	No data
NVE4655	-1.96239	75.2328	2.00066e-11	No data
NVE4682	-0.357453	649.131	0.00438866	160716
NVE4689	-2.10886	11.0926	0.000112475	199475
NVE4695	-3.89504	23.2156	5.86334e-12	199481
NVE4699	-3.04731	7.71171	0.000160348	199494
NVE47	-2.57972	1591.94	3.94361e-60	237717
NVE4718	-0.207056	4.34164	0.00450234	239485
NVE4812	-2.61813	5.61215	0.000668734	248716
NVE482	-0.23563	826.506	0.00726543	209069
NVE4822	-0.381972	157.08	0.00628946	118173
NVE4835	-0.669573	107.47	4.29759e-05	118077
NVE4945	-0.844718	152.955	3.90002e-07	189854
NVE5014	-3.4027	4.56201	0.000312967	212357
NVE5138	-0.595422	490.333	0.000250145	118813
NVE5212	-1.64559	69.212	2.5446e-06	118978
NVE5263	-0.419777	169.307	0.000821525	119080
NVE5283	-2.50351	9.11415	0.000152246	212582
NVE5346	-1.16358	21.142	0.00110992	212623
NVE5369	-1.31048	38.929	0.000188408	248720
NVE5442	-0.652558	2215.69	6.61344e-07	160849
NVE5495	-2.20842	7.17689	0.000267849	87545
NVE5496	-0.748104	103.429	2.25593e-05	87664
NVE5520	-1.73218	204.179	1.94806e-24	87454
NVE5533	-0.360597	347.356	0.00163453	245432
NVE5546	-0.310309	2646.24	0.000643856	245441
NVE5567	-1.84489	11.3104	4.39009e-05	212680
NVE5598	-2.18307	7.1566	0.000330347	119340
NVE5609	-1.29745	32.3695	2.29742e-06	212711
NVE5630	-0.135814	3.57038	0.0036417	119336
NVE5666	-0.807889	461.171	4.61353e-05	245480
NVE5705	-2.29842	33.0486	1.86243e-12	16535
NVE5708	-0.125835	37.3557	0.000825672	119695
NVE5709	-2.05392	10.9202	0.000605415	119610
NVE5711	-0.140478	5.67794	0.000150612	245493
NVE574	-5.4923	3.42959	6.24481e-05	209148
NVE5749	-0.431204	256.039	0.00252095	No data
NVE5785	-0.287771	320.499	0.00822767	119820
NVE5797	-0.430183	376.408	0.00439974	119796
NVE5803	-0.10303	3.97948	0.00632698	119746
NVE5911	-1.83257	14.4073	1.22687e-05	171063
NVE5966	-0.768285	9.65641	0.00830033	11965
NVE5995	-4.59938	24.6021	1.52204e-14	18127
NVE6049	-0.942123	24.4106	0.000582871	213090
NVE6180	-0.542926	71.6854	0.00648401	87907
NVE6218	-0.28401	303.996	0.00668874	30743
NVE6265	-3.65205	56.6563	1.00338e-23	120436
NVE6266	-0.984231	65.9817	4.43379e-07	120467
NVE629	-0.778063	55.1646	0.000589754	110891
NVE6291	-0.77147	58.5226	0.000192673	120428
NVE633	-3.1094	6.27279	0.000100443	168297
NVE6386	-2.11019	33.6971	4.61116e-11	213239
NVE639	-3.04105	6.45666	0.000119861	235182
NVE6443	-0.956502	20.9633	0.00111091	120766
NVE6444	-0.872572	25.3888	0.000660091	43151
NVE646	-0.707182	88.5758	0.000152276	110819
NVE649	-0.0585802	4.35296	0.00376882	No data
NVE6561	-0.503552	312.286	0.000264502	245756
NVE6573	-3.00327	45.0086	5.94382e-22	213403
NVE6606	-0.716602	82.8643	3.32585e-05	213425
NVE6636	-0.716594	277.685	0.00264111	No data
NVE6699	-0.438536	470.138	0.000246616	21645
NVE6861	-0.841127	91.2529	9.56302e-06	199911
NVE6908	-1.52457	107.411	6.01928e-12	88242
NVE6912	-0.415716	406.269	0.00417529	239698
NVE6913	-0.713748	301.488	1.92769e-05	239698
NVE6935	-1.62564	86.5502	3.04415e-06	No data
NVE6936	-1.85311	88.8706	2.7209e-15	88459
NVE6937	-1.71468	101.306	1.03574e-17	88459
NVE6946	-3.00866	2203.45	8.1546e-21	64340
NVE6967	-8.30364	13.8596	5.85367e-11	213625
NVE6980	-1.43666	25.8596	1.4111e-05	No data
NVE6991	-0.8833	56.6016	1.92997e-05	No data
NVE6992	-1.67572	29.3743	1.7538e-07	No data
NVE7055	-0.569997	325.392	1.56057e-06	213684
NVE7139	-2.62916	14.2016	2.3063e-06	No data
NVE719	-3.32401	19.7195	7.29165e-10	209268
NVE7338	-0.885494	74.8991	4.92462e-05	No data
NVE7348	-0.720997	762.518	1.82425e-07	45
NVE7349	-0.854981	235.272	1.24031e-08	45
NVE735	-2.41772	109.635	6.52878e-32	No data
NVE7374	-1.4266	23.1623	0.000458659	213968
NVE7399	-0.378793	341.366	0.00465739	171792
NVE7482	-1.72537	5.25401	0.00219294	200058
NVE7488	-3.54352	21.8392	3.09976e-13	No data
NVE7531	-2.59959	26.804	2.19628e-07	200128
NVE7532	-2.01714	47.3414	6.47652e-09	88765
NVE7534	-1.67697	37.605	3.01738e-09	239769
NVE7617	-0.397309	330.025	0.00121771	122656
NVE7618	-0.320548	424.096	0.00329046	214071
NVE7645	-0.328853	186.531	0.00844663	122716
NVE775	-0.618557	21.8	0.00759947	No data
NVE776	-0.636867	47.0383	0.00268515	No data
NVE7792	-0.392171	658.086	0.00121251	24063
NVE7818	-0.207442	19.4393	0.000560705	123139
NVE7858	-0.507028	469.135	0.00833486	233364
NVE786	-1.70786	48.2898	6.23768e-12	209303
NVE7869	-2.01612	52.8216	6.15554e-08	214340
NVE8090	-1.89522	110.658	4.37649e-18	80003
NVE8093	-3.93683	15.0991	6.83235e-09	196495
NVE8149	-0.344164	192.324	0.00664925	79767
NVE8153	-0.755263	61.0342	0.000789333	196568
NVE8182	-1.81918	54.2726	3.12538e-14	No data
NVE8232	-1.10202	529.152	2.48572e-13	196642
NVE8254	-1.51353	287.537	1.32005e-23	79820
NVE8332	-0.560383	107.28	0.000967371	88970
NVE8353	-1.28484	255.09	1.57004e-17	No data
NVE8356	-0.666749	31.777	0.00714718	200267
NVE8542	-2.24789	20.2105	1.11249e-08	No data
NVE8543	-0.561688	48.7475	0.00198617	No data
NVE8568	-1.93521	120.585	2.00268e-27	123804
NVE860	-0.89038	34.2908	0.000339825	57443
NVE872	-1.39697	8.54275	0.00111349	187681
NVE876	-2.44488	18.6187	2.40237e-08	21524
NVE8763	-0.333273	387.912	0.00149135	246278
NVE8844	-0.974294	348.06	7.14321e-06	200349
NVE8932	-1.03698	86.4935	3.05739e-06	200452
NVE8933	-3.60201	6.63451	2.81382e-05	200452
NVE9065	-0.64375	70.8193	0.000179941	42358
NVE9080	-0.391866	87.2402	0.00908473	246347
NVE9152	-3.36862	29.7685	2.0787e-17	214952
NVE9165	-1.41941	95.1448	1.43394e-09	124784
NVE9166	-1.85065	232.779	1.29047e-16	246382
NVE9202	-1.45651	223.43	5.15622e-11	214990
NVE9269	-0.517921	48.4218	0.00793899	215047
NVE927	-0.396134	351.352	0.00201322	111552
NVE9332	-0.650145	143.093	0.00130475	215113
NVE9386	-2.46018	38.3722	3.74391e-14	No data
NVE9416	-1.09304	94.8179	5.22727e-09	239933
NVE9425	-0.989887	302.667	1.1692e-07	200525
NVE9474	-0.920259	44.8222	6.14712e-05	200577
NVE9605	-1.0539	10.6586	0.00235765	125693
NVE9606	-1.14626	70.9112	2.3591e-06	No data
NVE9613	-1.11905	30.5587	0.000229003	237402
NVE9615	-0.334584	9.09182	0.00979523	125711
NVE967	-0.131162	3.17052	0.0029898	No data
NVE9672	-3.64504	32.0044	2.9845e-17	215302
NVE9684	-0.0771747	2.10666	0.00950641	17374
NVE9704	-0.302109	306.89	0.00901233	125899
NVE9906	-0.409374	252.465	0.00151605	200670
NVE9926	-1.12562	19.5384	0.000333794	240018
NVE9932	-0.609633	166.515	1.84709e-05	200701
NVE9944	-0.409889	62.6878	0.0083811	240022
