# Supplementary material for: Cnidarian hair cell development illuminates an ancient role for the class IV POU transcription factor in defining mechanoreceptor identity
Source: eLife. 2021 Dec 23;10:e74336. doi: 10.7554/eLife.74336 (PMC8846589; doi:10.7554/eLife.74336)
Supplement: Supplementary file 3. [file elife-74336-supp3.xlsx]

## Sheet: Sheet 1 - upregulated_genes
upregulated_genes
gene	fold_change	mean_counts	pvalue	JGI_ID
NVE10008	1.24304	115.419	1.30618e-06	215519
NVE10024	0.327739	605.161	0.00748443	227384
NVE10038	0.675514	44.081	0.00223915	148195
NVE10073	0.928428	84.3052	5.04842e-05	126479
NVE10135	1.78963	193.629	7.93832e-10	127011
NVE10136	1.15277	57.394	1.66005e-05	127011
NVE10137	0.977217	37.9313	0.000471519	127073
NVE10233	0.516183	273.608	2.12198e-05	173148
NVE10241	2.09386	721.824	4.16101e-15	246737
NVE10287	0.702997	13.5179	0.00705178	No data
NVE1029	1.61146	54.9788	2.50075e-10	52484
NVE10319	1.21521	45.2597	6.48354e-05	200797
NVE10321	1.2196	61.2297	0.000138099	90390
NVE10322	1.11494	31.8163	0.000113737	No data
NVE10323	1.40397	44.0127	2.09453e-07	No data
NVE10328	0.296407	261.878	0.0072114	200803
NVE1038	0.74477	55.4842	0.000537238	No data
NVE10455	0.445094	268.838	0.00206825	No data
NVE1047	0.440528	260.436	0.000610411	No data
NVE10499	1.58346	5.50259	0.00293156	No data
NVE10535	2.83612	197.173	4.40895e-21	127768
NVE10577	1.04033	127.625	1.59136e-10	235823
NVE10598	1.09729	249.669	1.98666e-08	215949
NVE10637	0.919237	287.465	5.38938e-07	246830
NVE10640	1.01801	57.2153	1.28297e-05	13724
NVE10664	0.904785	32.9343	0.0010785	223236
NVE10698	0.16729	4.81958	0.00789672	No data
NVE10699	2.57689	29.5095	6.28052e-13	55147
NVE10705	1.81017	18.4634	1.78959e-05	216045
NVE10788	0.447555	154.876	0.00183443	234362
NVE10794	0.876535	100.598	0.000140483	161826
NVE10935	2.97176	4.27264	0.00068733	216157
NVE10949	1.15269	243.799	6.26261e-07	173414
NVE10951	1.77315	252.108	6.06976e-11	128520
NVE110	0.343656	244.69	0.00315887	79420
NVE11004	1.47871	96.8483	1.59115e-06	246912
NVE1109	0.302928	324.812	0.00967377	168568
NVE11121	0.326254	458.689	0.0034606	192736
NVE11158	0.773784	93.8681	0.000242403	128941
NVE11184	0.423788	644.895	0.000189303	246966
NVE11221	0.642259	637.719	1.30036e-06	91032
NVE11306	0.345319	330.878	0.00816947	236578
NVE11307	0.632407	17.699	0.00920843	240246
NVE11308	1.2165	53.9635	5.65666e-07	240246
NVE11311	1.43901	213.299	8.61734e-09	No data
NVE11322	0.406568	394.94	0.00560852	162025
NVE11361	0.549131	124.897	0.000944212	31987
NVE11411	0.334578	729.872	0.00197502	129106
NVE11413	0.345224	158.136	0.00417908	129166
NVE11539	0.298034	220.013	0.00868332	247046
NVE11556	2.14746	43.372	1.3683e-10	216602
NVE11589	0.376087	238.7	0.00177458	129467
NVE11632	1.36555	346.918	4.40853e-17	129670
NVE11685	0.513801	64.4097	0.00209662	216720
NVE11697	2.08389	18.0468	7.65196e-07	91623
NVE1170	0.921629	40.0295	0.000146449	209669
NVE11707	1.88845	241.209	1.54416e-16	240295
NVE11746	1.78394	93.0102	2.53185e-10	240316
NVE11918	1.74735	2879.65	2.32352e-29	216823
NVE11919	1.42982	646.702	5.39441e-11	216823
NVE11952	1.74972	19.3723	6.40759e-07	216856
NVE11982	0.815266	25.2813	0.00146999	No data
NVE11984	1.49311	801.62	6.37618e-07	247194
NVE11985	1.37415	454.013	6.66132e-07	247194
NVE12019	1.00383	12.1169	0.00328231	223433
NVE1202	0.538967	119.299	0.00154046	85254
NVE12038	0.357072	162.316	0.00583175	216943
NVE1205	2.09856	102.007	2.83654e-19	239007
NVE12148	0.504684	1043.23	0.00167559	No data
NVE12190	0.913206	214.688	0.000395575	240414
NVE12217	0.964044	37.2057	0.000690958	No data
NVE12267	1.42771	42.6839	2.10113e-07	No data
NVE12450	0.869461	61.2805	0.000212574	1638
NVE1248	0.793155	230.247	0.000148832	239035
NVE12486	1.46175	180.8	1.26125e-11	60648
NVE12492	0.300588	372.324	0.00974335	181511
NVE12553	1.60457	261.948	3.79041e-10	201627
NVE12607	1.45196	122.062	8.59021e-10	No data
NVE12608	1.65128	200.535	3.28019e-10	No data
NVE12609	1.502	392.283	1.03038e-08	131215
NVE12627	0.334498	600.743	0.00696506	10204
NVE1264	0.286527	366.313	0.00960854	85624
NVE12650	0.882394	255.506	1.21861e-05	193399
NVE12677	0.625182	159.484	0.00130363	131395
NVE12703	2.05913	29.0912	2.99015e-08	131488
NVE12723	0.515477	104.874	0.00186	131533
NVE12739	0.449836	106.85	0.00238024	174285
NVE12762	0.430018	390.567	0.00457288	131609
NVE12766	0.848834	62.4791	0.000471459	131588
NVE12771	1.0437	18.96	0.00102759	217449
NVE12822	2.36796	288.329	2.4458e-24	66338
NVE12901	0.556753	32.7467	0.0063006	No data
NVE1294	0.670453	48.3602	0.00446367	36977
NVE12947	0.4982	576.903	1.96948e-05	80798
NVE130	1.09556	60.6132	5.3827e-07	196227
NVE13002	0.524883	153.61	0.000366101	80445
NVE13023	2.05286	44.365	7.5145e-12	80340
NVE13026	1.42055	27.4761	0.0004882	80734
NVE13057	0.5885	77.8495	0.00103277	No data
NVE13072	2.91224	11.8933	6.15014e-07	No data
NVE13073	1.89393	32.5327	2.15425e-08	92539
NVE1308	0.816229	90.6957	0.000148671	35272
NVE13176	0.981872	480.795	2.31e-12	92522
NVE13177	1.14857	1927.78	1.86501e-13	181671
NVE13285	0.56546	53.5181	0.00732982	149524
NVE13321	0.345675	287.215	0.00216024	131967
NVE13347	1.03171	224.513	5.14204e-11	174406
NVE13424	0.487055	57.203	0.00578603	5059
NVE13538	1.58514	270.922	1.43368e-12	92831
NVE13539	1.40104	11.0625	0.00064153	No data
NVE13540	1.32999	23.8761	0.000181828	92693
NVE13544	2.14106	47.9604	1.88198e-11	201895
NVE13545	1.74153	47.224	1.31203e-08	201895
NVE13546	2.34709	432.759	7.09234e-20	240562
NVE13654	0.502931	124.077	0.00318838	247514
NVE13741	0.56794	28.9561	0.00512492	217852
NVE13806	0.85531	135.68	6.1549e-05	133495
NVE13811	1.96814	39.0978	1.84031e-06	217931
NVE13812	1.84123	511.127	2.48496e-12	247586
NVE13813	1.95645	281.369	5.61298e-13	217934
NVE13913	0.328188	212.583	0.00789721	93031
NVE14199	1.28238	32.9209	0.000119017	No data
NVE142	1.4135	219.949	1.21447e-10	79120
NVE14257	1.21747	102.498	2.20591e-08	240732
NVE14281	0.93604	13.8824	0.0027118	93663
NVE14311	1.61805	978.12	6.93355e-09	182064
NVE144	1.5288	212.048	1.56213e-09	157790
NVE14451	0.79126	222.001	1.92931e-07	247681
NVE14511	0.668344	139.003	3.6494e-06	174894
NVE14560	0.316497	205.352	0.00393111	240783
NVE14593	1.40689	89.354	2.97744e-11	182128
NVE14687	1.06403	63.3524	0.000188566	No data
NVE14689	2.14597	245.75	8.93968e-16	134607
NVE14804	1.41328	146.05	1.46547e-11	No data
NVE14895	0.692474	14.0606	0.00818929	52223
NVE1496	1.14095	11.7413	0.00250011	112425
NVE14967	0.483093	96.4226	0.00228627	135081
NVE14968	0.526869	157.166	0.000479975	135116
NVE14984	0.345578	220.118	0.00388165	135094
NVE15	0.314559	759.57	0.00307309	157638
NVE15328	0.223579	11.8907	0.00952815	218755
NVE15493	0.483903	50.7236	0.0039058	94752
NVE15512	0.959934	21.5451	0.0011113	94642
NVE15551	1.63528	51.6849	9.88524e-10	247877
NVE15554	1.63563	55.1169	9.87276e-08	No data
NVE1557	1.77841	80.5118	1.816e-13	112587
NVE1558	0.664652	138.808	0.00199806	168742
NVE1559	1.85269	279.593	5.41757e-17	112522
NVE15610	0.796274	42.873	0.00287744	231086
NVE15649	2.00631	129.902	3.0782e-17	136469
NVE15651	1.08822	405.698	0.000243064	247901
NVE1567	0.554514	1037.12	4.69786e-06	112567
NVE15697	1.12439	34.5728	0.00105144	224038
NVE15727	0.937793	162.747	1.42317e-06	136571
NVE15732	1.13972	102.845	0.000217004	247932
NVE15733	2.52118	654.103	2.85825e-25	136624
NVE15734	0.67419	1004.85	2.88414e-06	218982
NVE15766	0.617343	27.0018	0.00635757	240985
NVE15789	0.600655	471.154	1.42086e-06	94933
NVE15845	0.306538	228.502	0.00717568	95020
NVE15962	0.565928	441.151	0.000146872	194562
NVE16010	1.36165	25.4002	1.5012e-05	No data
NVE16031	0.801439	22.5653	0.00217823	219163
NVE1608	0.3595	167.117	0.0034732	112761
NVE16109	0.475182	191.899	0.00219703	36196
NVE16127	1.96829	30.5473	3.1942e-09	203012
NVE16128	1.6849	55.1672	1.30995e-08	203012
NVE16129	1.54983	44.3382	2.58309e-07	73215
NVE16203	1.258	53.9697	3.15422e-05	219238
NVE16204	1.18916	58.5976	2.09744e-05	219239
NVE16227	0.347524	515.467	0.00332764	248023
NVE16263	0.069328	1.9987	0.00954909	No data
NVE16294	1.22204	88.5463	1.54077e-08	227963
NVE16303	1.7931	218.55	1.63114e-17	81344
NVE16311	1.5998	33.162	1.50641e-07	81701
NVE16316	2.8595	7.33661	3.67586e-05	81530
NVE16317	1.47993	21.2138	9.59238e-06	196961
NVE16363	0.65167	11.9657	0.00895954	33670
NVE16448	0.713613	403.237	0.000145872	81540
NVE16457	0.64097	89.6292	0.000129823	81769
NVE16464	1.98271	573.855	1.78292e-20	81453
NVE16481	0.256574	985.282	0.00736848	81294
NVE16498	0.434809	332.409	0.00750767	81752
NVE16504	0.697849	98.9682	0.000196232	238275
NVE16625	0.618109	67.3222	0.000556621	234572
NVE1663	0.870108	119.589	7.61252e-05	112848
NVE16645	0.553683	874.635	1.50231e-05	95571
NVE16702	3.10641	20.9891	7.08193e-09	No data
NVE16754	1.80168	62.7495	1.50108e-12	10515
NVE16780	0.757003	631.784	2.97677e-06	248060
NVE16813	0.327682	455.875	0.00172664	163524
NVE16862	1.61818	163.93	2.25635e-12	232363
NVE16871	0.297844	383.421	0.0053475	No data
NVE16876	1.85655	214.084	7.45632e-13	95962
NVE16877	1.93581	116.054	8.0206e-15	241205
NVE17063	0.443119	66.1535	0.00684587	No data
NVE17099	1.00358	26.5067	0.000504633	203353
NVE17116	0.482863	114.655	0.00306643	96187
NVE17162	0.760417	95.2365	0.00102805	3418
NVE17163	0.707435	25.2114	0.00615902	3418
NVE17213	0.489845	389.085	0.0043255	No data
NVE17214	1.22041	31.5492	3.61066e-05	No data
NVE17241	0.770718	393.845	0.00111047	138243
NVE17360	1.66092	153.057	3.09756e-12	163734
NVE17415	1.31728	81.923	1.07774e-05	No data
NVE17476	2.11899	160.025	4.72913e-17	248162
NVE17479	1.10804	550.281	1.25699e-07	233740
NVE17480	0.836611	177.878	0.000551657	No data
NVE17627	0.722641	159.715	0.000612848	203627
NVE17639	0.594157	174.123	0.000256902	96736
NVE17659	1.87993	107.249	1.18597e-10	No data
NVE17660	0.721395	289.569	0.00156596	241383
NVE17662	3.05213	140.241	2.62316e-32	203655
NVE17663	1.77391	235.365	7.97843e-15	241384
NVE17664	1.75331	70.1126	3.54695e-10	241385
NVE17674	2.16012	82.6398	9.99667e-18	203669
NVE17675	1.72117	124.127	2.04358e-10	241394
NVE17693	1.24978	35.7326	3.87925e-06	232409
NVE17724	0.441873	398.075	0.00102446	No data
NVE17725	0.424588	66.2631	0.00661758	No data
NVE17753	0.879201	120.875	8.83283e-08	No data
NVE17856	0.882484	358.794	9.75517e-10	60176
NVE17870	1.94624	217.204	1.95589e-11	241440
NVE17871	1.50186	185.851	3.74715e-09	241441
NVE17885	3.17702	148.323	1.07619e-34	241448
NVE17888	2.14892	226.479	8.37316e-21	97036
NVE1789	1.62188	59.4292	1.97043e-09	244271
NVE18135	0.661012	54.9378	0.00143446	No data
NVE18174	0.994499	19.0835	0.00122772	219996
NVE18242	2.12788	5.35366	0.000825837	152156
NVE18317	0.328024	440.258	0.00376623	204029
NVE18337	0.349808	304.79	0.00699017	241591
NVE18354	2.01551	24.1152	1.47253e-09	97868
NVE18355	0.373935	418.658	0.00264557	195005
NVE1849	0.579846	49.0248	0.00659466	244297
NVE18517	0.35049	249.223	0.00499021	98066
NVE18531	1.0196	353.307	1.06251e-06	98013
NVE18687	0.406025	153.968	0.00374632	98336
NVE18801	1.82445	10.978	7.58708e-05	No data
NVE18870	1.91128	173.797	9.41421e-17	220309
NVE18895	0.305353	1835.19	0.00908859	197208
NVE18952	1.31793	219.649	7.88796e-09	No data
NVE18954	1.37049	1714.39	5.33391e-09	39131
NVE18959	1.22604	1394.08	0.00249388	No data
NVE18960	0.892253	457.209	0.000570438	238343
NVE18961	1.25178	452.811	1.66795e-05	238344
NVE18974	1.21371	182.21	1.8994e-07	No data
NVE19036	0.704298	181.086	0.00395739	No data
NVE19037	1.43312	609.743	1.17734e-08	238391
NVE19039	1.94322	1198.67	4.77068e-10	238391
NVE19041	1.23728	190.931	1.70615e-06	82364
NVE19080	1.48811	8.09485	0.000916115	197412
NVE19087	1.30136	40.4557	2.2961e-05	158913
NVE191	0.474276	556.289	0.000131225	237796
NVE19132	0.568847	322.898	6.91385e-06	228065
NVE19143	2.09349	54.6886	2.70484e-15	39308
NVE19156	2.30093	293.723	4.02143e-40	98737
NVE19214	0.246365	650.355	0.00775546	183701
NVE1922	0.545639	58.1865	0.00189542	113453
NVE19313	1.49633	118.767	3.48221e-08	140183
NVE19315	0.636058	917.22	0.000661793	2203
NVE19319	0.776441	184.156	1.33445e-06	227643
NVE19321	2.13944	78.3515	1.12347e-15	140260
NVE19355	1.2182	139.536	7.10384e-06	20000
NVE19368	1.36392	283.902	1.42979e-17	241768
NVE19369	0.536701	592.152	2.52603e-05	98857
NVE19500	1.90327	17.4795	2.19764e-06	248347
NVE19531	0.26103	772.283	0.00628119	99263
NVE19551	1.10363	142.943	4.00535e-08	99140
NVE19567	1.29426	34.9017	2.04818e-05	22127
NVE19588	0.384073	188.378	0.00449062	241849
NVE19595	2.01176	25.3575	2.91125e-10	No data
NVE19597	1.36668	426.183	2.55075e-14	63846
NVE19674	0.253794	1710.18	0.00797452	233772
NVE1972	0.448273	327.521	0.000904604	169043
NVE1974	1.41524	321.79	1.74763e-14	53325
NVE1975	0.939136	78.423	5.33269e-07	113641
NVE19825	0.845532	48.6507	0.000168563	204788
NVE19827	0.813135	19.1994	0.0035276	99578
NVE19836	1.56597	48.7048	1.19366e-09	241940
NVE19864	1.08983	39.3472	8.14582e-05	449
NVE19865	1.2864	22.3196	0.000146052	449
NVE19866	1.01975	105.499	8.10038e-06	195205
NVE19886	1.28189	125.057	2.93498e-13	248382
NVE19887	0.850327	36.9476	0.000529415	220538
NVE19985	0.628452	354.936	2.28559e-06	164913
NVE20002	0.70752	161.962	1.21824e-05	140744
NVE20076	0.443673	243.633	0.00476082	140878
NVE20102	1.24606	146.295	2.66157e-11	241999
NVE20112	2.23799	109.774	2.66669e-17	No data
NVE20120	0.460685	890.535	0.000175583	99968
NVE2018	1.37711	112.513	7.12024e-14	210296
NVE20194	1.55444	247.433	3.2531e-13	184260
NVE2027	0.703303	37.3475	0.00157025	244378
NVE20329	3.00696	356.355	5.02091e-30	4663
NVE20437	1.1138	419.836	8.71491e-08	205168
NVE20501	2.56925	506.598	1.14199e-32	100407
NVE20584	0.400707	194.673	0.00175152	165217
NVE20585	0.629063	548.423	9.58089e-06	34679
NVE20613	0.440442	582.985	4.56977e-06	242167
NVE20709	0.641631	26.6715	0.0066641	No data
NVE20724	1.1878	28.8286	2.8873e-05	613
NVE20741	1.86136	22.0756	8.38472e-08	205377
NVE20743	1.46061	117.491	2.67066e-12	25059
NVE20961	0.443343	230.406	0.00379986	38935
NVE20964	1.31644	73.8744	1.45459e-08	82891
NVE20978	1.01783	89.7529	3.10651e-06	82559
NVE20979	0.498665	66.3618	0.00436013	178355
NVE2100	1.98626	786.813	8.21614e-22	85822
NVE21010	0.360911	167.319	0.00490024	159148
NVE2102	1.34699	136.985	2.00838e-10	239130
NVE21028	0.349791	331.197	0.002372	82804
NVE2105	2.44719	19.027	9.35027e-09	198844
NVE21061	1.72486	830.32	1.69103e-12	238573
NVE21084	0.634177	939.632	0.000226577	82725
NVE21135	2.23566	68.4635	3.13082e-22	165424
NVE21136	2.55346	53.3714	2.97171e-21	205522
NVE21227	0.882158	345.065	3.62265e-09	No data
NVE21251	0.888268	76.7554	0.000308325	101641
NVE21390	0.35615	277.285	0.00803734	165579
NVE21413	0.333251	306.716	0.0019787	242370
NVE21414	1.29424	93.1831	2.35134e-07	50112
NVE21481	1.5753	21.8984	0.00155373	65464
NVE21498	0.500759	402.134	0.000484557	165644
NVE21615	1.71553	22.5195	5.75227e-06	No data
NVE21621	0.398444	96.7532	0.00678819	No data
NVE21741	0.363737	214.795	0.00430252	185023
NVE2177	1.36385	31.0956	6.15849e-06	198923
NVE21770	2.19392	89.5834	1.08595e-18	26355
NVE2178	0.965072	21.616	0.00219338	198923
NVE21825	1.58626	304.117	4.98592e-12	142279
NVE21826	2.28822	66.5487	7.37502e-17	221080
NVE21827	2.02551	147.664	1.40685e-08	221080
NVE21852	2.52142	6.02644	0.000406026	No data
NVE21880	0.66802	1067.4	0.000843191	No data
NVE21881	0.461999	376.43	0.00116695	232632
NVE21889	0.271533	1802.08	0.000423839	102784
NVE2193	2.0159	225.597	2.95551e-14	160199
NVE22003	2.2091	286.168	9.2033e-13	165983
NVE22019	1.39527	927.352	6.0019e-07	103135
NVE2203	0.517298	216.095	0.000380704	239183
NVE22052	0.636281	83.9774	5.44678e-05	242625
NVE22053	1.09227	39.0271	0.00028594	103179
NVE22087	1.09932	8.58507	0.00414225	No data
NVE221	0.455685	291.618	0.00475668	79348
NVE22139	0.788813	83.2237	0.000282526	103228
NVE22147	1.62919	95.0535	1.09576e-08	No data
NVE22148	1.50653	104.21	1.9219e-07	103352
NVE22150	1.16508	405.836	8.1469e-06	206329
NVE22151	1.38801	61.7718	4.68359e-07	103399
NVE22153	2.44971	16.7001	2.06962e-08	No data
NVE22154	1.70002	519.648	3.16965e-09	No data
NVE22170	1.62177	86.7993	1.37552e-09	242650
NVE22206	0.853496	267.971	9.22401e-05	No data
NVE22225	0.339376	939.67	0.00408504	236893
NVE22270	0.542829	100.952	0.00150196	103563
NVE2234	0.375884	692.538	0.00444006	160244
NVE22433	1.1918	30.8281	1.36808e-05	238639
NVE22434	1.93414	46.7062	8.29717e-11	75220
NVE22462	1.69705	1761.21	4.51875e-11	238654
NVE22463	2.33976	2948.53	8.25377e-25	238655
NVE22485	1.36617	250.989	6.04324e-13	83480
NVE22486	1.56899	26.7442	1.85278e-05	No data
NVE22525	0.303106	2955.89	0.00895589	178640
NVE22528	0.293616	1024.05	0.000691853	No data
NVE22594	1.7937	539.639	3.79442e-22	No data
NVE22650	0.522081	214.667	0.00043445	221241
NVE22651	0.470517	888.222	0.00011087	248582
NVE2273	0.541154	520.126	0.000123338	244396
NVE22734	0.37508	348.376	0.00158772	185483
NVE22736	1.37256	338.472	5.80877e-16	166263
NVE22738	0.51332	190.329	0.00060429	1173
NVE22785	1.18583	16.824	0.000529024	No data
NVE22821	2.40252	44.6006	2.92293e-11	225035
NVE22856	0.539568	782.654	0.000555797	242783
NVE22904	0.794779	13.572	0.00546588	221303
NVE22963	1.35125	9.73262	0.00164627	2784
NVE23007	0.445524	216.33	0.000599422	229374
NVE23050	1.22521	695.127	2.212e-06	57118
NVE23081	0.72514	90.2307	4.71578e-05	248604
NVE23149	1.90431	35.3591	1.63375e-10	No data
NVE23196	1.1161	51.8874	1.09306e-05	104856
NVE23198	2.44734	9.91623	1.43191e-05	242891
NVE23228	0.928789	15.5246	0.00357565	No data
NVE23233	2.08312	14.5992	1.92736e-05	225137
NVE23343	1.37551	46.4727	1.63068e-06	206995
NVE23511	0.857451	42.0498	0.000349076	225207
NVE23534	2.33853	17.5729	1.21958e-07	242996
NVE23582	0.51628	317.076	0.000560474	166728
NVE23594	0.644389	32.5504	0.00287386	105476
NVE23667	1.45523	110.264	1.43031e-13	105643
NVE23814	0.367908	207.025	0.0075405	207310
NVE23829	0.300678	256.933	0.00939351	243097
NVE23861	1.50706	15.7514	0.000307608	No data
NVE23864	0.348862	265.428	0.00447492	166897
NVE23877	0.598678	25.9385	0.00897266	48854
NVE2396	0.820256	174.498	1.60268e-06	188457
NVE23990	0.784243	720.968	2.10308e-09	236409
NVE240	1.87978	65.6042	3.71816e-15	237825
NVE24056	1.4508	107.979	5.90114e-08	No data
NVE24089	0.944433	1020.88	2.04435e-05	238805
NVE24090	1.61352	136.839	4.04261e-17	No data
NVE24101	0.673931	102.079	0.000133595	238811
NVE24130	0.404741	455.366	0.00377097	37295
NVE24152	1.44214	198.822	9.17127e-16	243139
NVE24201	0.532018	730.733	0.00177166	235000
NVE24260	1.20121	455.873	2.5903e-06	243173
NVE24290	1.91806	2390.45	3.04602e-13	106339
NVE24294	1.603	1957.13	4.46106e-10	243192
NVE24395	1.38649	54.7972	1.94068e-07	243220
NVE24400	0.352132	578.994	0.00438291	243223
NVE24410	0.544367	270.15	3.71398e-05	106556
NVE24425	1.26765	31.4066	2.78476e-05	106535
NVE24426	1.2148	250.846	2.98635e-05	106492
NVE24625	1.19686	76.1066	7.66698e-09	243289
NVE24640	0.563506	1576.3	1.03808e-06	167234
NVE24677	0.12344	3.16686	0.00848282	438
NVE24707	1.81083	4.19482	0.00361435	No data
NVE24789	1.67533	87.8037	3.66312e-11	No data
NVE24897	0.432411	149.654	0.00500267	167406
NVE249	2.46995	170.562	4.42257e-32	237831
NVE24912	0.551025	266.608	8.12372e-05	22912
NVE24978	1.09209	10.4948	0.00250866	107994
NVE24979	1.76668	21.5069	4.51347e-06	243405
NVE24992	0.708571	832.768	6.63502e-09	28706
NVE25086	1.23872	31.9915	4.38559e-05	208161
NVE25087	1.6873	27.3643	7.62436e-08	232845
NVE251	0.776365	66.8065	0.000404143	237832
NVE25130	2.12807	57.9137	1.27535e-14	208207
NVE25192	2.95226	117.925	5.95905e-30	198219
NVE252	2.73475	259.59	2.7679e-25	237832
NVE25263	2.3977	364.858	1.73776e-21	84204
NVE25277	1.69631	110.36	1.64167e-15	84193
NVE25278	0.813864	167.793	1.22891e-05	238885
NVE25285	1.4924	73.5795	7.21699e-08	238889
NVE25286	0.758712	96.8392	0.000127413	84066
NVE25301	1.59354	284.973	2.51301e-23	84327
NVE25371	0.315392	844.544	0.00448661	186830
NVE25535	0.355556	185.88	0.00305253	167691
NVE25646	1.71574	30.0036	6.45728e-07	30997
NVE25686	0.552272	648.333	0.0025746	108947
NVE25782	0.616354	271.963	2.77743e-05	243663
NVE25815	1.97279	614.723	6.13225e-16	No data
NVE25816	1.47778	476.789	1.62252e-08	No data
NVE25817	1.99022	227.982	2.18121e-10	208634
NVE25818	1.65164	283.685	1.37204e-11	208635
NVE25820	1.17409	249.557	1.36981e-06	243673
NVE25856	0.864527	345.251	1.49821e-05	53728
NVE25857	1.9808	414.366	3.81221e-27	243681
NVE2593	1.3892	15.2129	0.000722392	210691
NVE25937	2.19939	22.808	5.19663e-07	No data
NVE25957	1.24818	457.497	1.43522e-08	243708
NVE26025	0.289059	239.797	0.00876645	208816
NVE26057	1.41266	229.468	6.39745e-08	243754
NVE26058	2.38354	301.388	8.56872e-26	243754
NVE26059	1.29546	759.039	2.26742e-10	110159
NVE26121	0.446563	193.855	0.00135417	243796
NVE26193	0.769054	65.3571	0.000189237	243817
NVE2639	0.816952	66.1804	0.000164802	210732
NVE2689	0.464518	178.965	0.000162212	244581
NVE2729	0.426083	87.2694	0.00944535	10813
NVE2775	1.46769	5.62349	0.0027333	210850
NVE2834	0.325855	450.483	0.00258569	169580
NVE2901	1.5712	186.585	4.47935e-08	239209
NVE2937	0.592834	919.678	4.34239e-07	236459
NVE3006	1.76062	31.9202	1.09749e-05	199125
NVE3008	1.47224	72.2628	4.85359e-08	No data
NVE3041	0.37133	346.577	0.00251249	86628
NVE3065	0.547179	1276.77	0.00050478	160437
NVE3101	0.705796	741.943	9.29879e-05	199235
NVE313	1.3155	23.1143	4.70481e-05	85050
NVE3287	0.744693	61.6477	0.000102805	25237
NVE33	0.86358	186.507	1.27168e-06	No data
NVE34	1.61321	25.6905	4.48069e-07	No data
NVE3460	1.97313	174.386	1.8882e-14	116097
NVE3481	0.391937	101.215	0.00523997	189126
NVE350	2.87197	310.457	1.16103e-35	238967
NVE3573	0.922933	83.3273	1.53305e-05	116323
NVE3585	0.598166	217.534	0.000453918	169978
NVE3589	1.64802	47.5813	1.05339e-07	233126
NVE3618	0.82879	147.02	2.0165e-06	244883
NVE3643	2.46933	703.622	1.75911e-29	No data
NVE3644	2.01266	437.358	2.46652e-14	211464
NVE3645	0.350587	369.562	0.00159516	189239
NVE3648	0.409438	229.783	0.00300531	116420
NVE3662	1.0433	237.74	0.000103014	244905
NVE3745	1.54227	21.4565	3.74617e-06	116597
NVE3754	0.740091	347.313	3.60049e-06	24420
NVE3769	0.909228	195.52	1.16602e-05	No data
NVE3793	0.63288	76.5422	0.00150219	86975
NVE3839	1.85441	580.797	4.11702e-12	199302
NVE3841	1.51932	49.5576	9.58301e-07	239380
NVE3842	3.47379	320.83	3.10586e-30	239381
NVE3843	1.70279	400.77	3.64771e-10	232013
NVE3844	1.63125	2217.96	3.40766e-14	232014
NVE3845	1.68453	2300.09	1.79529e-13	232015
NVE3886	0.421724	124.799	0.00278771	239406
NVE4034	0.641055	81.3464	0.000451006	244995
NVE4053	1.38391	43.0008	2.2474e-08	116714
NVE4054	1.4955	37.9473	3.98029e-06	211665
NVE4084	2.08483	129.991	2.08427e-15	116940
NVE4206	0.423802	190.507	0.0070508	189473
NVE4231	1.6545	99.2252	3.30694e-13	21743
NVE4236	0.344834	763.552	0.000100043	237233
NVE4318	0.589522	20.6904	0.00694298	211889
NVE4417	1.07462	100.597	9.43987e-08	245131
NVE442	0.395413	404.74	0.000335825	243846
NVE4437	0.951126	550.189	8.97849e-09	117546
NVE4441	0.984849	38.1022	0.000196384	211989
NVE4442	0.876578	115.028	6.93284e-06	211990
NVE4489	1.6122	38.1525	2.44922e-08	No data
NVE4519	0.659056	340.304	6.68115e-08	245175
NVE4591	0.906812	62.6022	2.84956e-05	64522
NVE4719	0.595172	245.796	0.00271689	87270
NVE4745	0.376689	259.708	0.00624178	239505
NVE4765	0.535928	230.939	0.000386529	117981
NVE4767	5.08685	13.8824	5.72008e-09	No data
NVE480	0.968097	322.003	2.36474e-07	70204
NVE4965	6.52694	14.9536	6.06227e-10	118459
NVE4966	1.72948	453.856	2.20436e-23	245286
NVE5110	2.43218	22.9474	2.73906e-09	212431
NVE5124	1.36228	26.7353	2.45759e-05	70313
NVE5128	0.793035	85.0867	9.17332e-06	28213
NVE517	2.52164	21.3169	6.23666e-09	243877
NVE5198	1.36996	31.0548	2.91749e-06	212503
NVE52	0.806515	37.617	0.000583767	79227
NVE5210	1.83791	109.219	5.66008e-18	212516
NVE5211	0.953504	112.215	1.09112e-06	212518
NVE5234	0.591584	358.735	0.00258824	212543
NVE531	0.777494	793.794	0.000774922	52570
NVE533	1.27704	102.926	1.33363e-06	21316
NVE5391	0.55163	146.728	0.00012584	160797
NVE54	0.768537	34.3142	0.0014948	32913
NVE541	0.91952	66.4365	4.77339e-05	110685
NVE5471	1.54179	1570.19	1.37758e-19	160868
NVE5548	0.987869	14.5849	0.00196123	212656
NVE5549	3.1652	244.199	1.24785e-41	212657
NVE562	1.5426	47.9538	8.70708e-09	209131
NVE5658	1.98478	71.5266	3.53817e-15	212751
NVE5728	2.17496	341.02	5.91571e-13	245503
NVE5729	0.940103	16.9396	0.00409821	No data
NVE5835	1.01778	504.912	7.00487e-08	212909
NVE5867	1.31676	7.59733	0.00206102	248732
NVE5891	0.517054	282.71	2.66905e-05	230299
NVE5949	1.45269	74.0609	3.49779e-10	51995
NVE5986	3.72535	13.9255	6.93491e-10	No data
NVE6044	0.386956	1480.44	0.00273361	245603
NVE6054	0.747548	197.378	9.60415e-07	227249
NVE6063	0.315254	426.907	0.00704675	171134
NVE6118	0.478492	148.459	0.00356644	239593
NVE6182	1.20469	71.7146	0.00017623	34292
NVE6183	1.08612	63.4922	7.49715e-06	33556
NVE6187	1.1265	71.3162	1.61425e-06	88003
NVE6207	0.696468	61.546	0.000635415	No data
NVE6208	0.481594	184.676	0.00205844	No data
NVE6235	0.587736	49.6715	0.00550486	199838
NVE6238	0.512837	263.26	9.16523e-05	180278
NVE6365	0.766952	152.603	1.50776e-06	245668
NVE6373	0.654307	41.84	0.00127437	56219
NVE644	0.401622	178.565	0.00347792	243939
NVE6557	1.67553	1168.48	3.22182e-15	213382
NVE6691	1.12707	27.5203	0.000372195	213493
NVE6692	0.913868	63.0373	0.00130839	245803
NVE6706	0.478285	646.147	1.64698e-05	171497
NVE6865	1.52099	213.928	2.36952e-12	88294
NVE6877	0.922646	44.2787	0.000350712	88268
NVE6895	0.449506	88.2192	0.0056108	88271
NVE7015	0.647123	27.6977	0.00764512	121593
NVE7098	3.37095	42.8332	8.56552e-17	226089
NVE7112	0.728457	13.4895	0.00740374	213727
NVE7121	1.75684	105.376	9.19598e-09	No data
NVE7124	0.931593	219.67	7.21521e-13	213742
NVE7125	2.16791	45.5616	1.06385e-11	213743
NVE7126	1.75004	394.618	1.43011e-15	213743
NVE7219	0.442323	108.486	0.00175048	122013
NVE7300	2.73273	60.4745	2.02515e-22	213913
NVE7301	2.37742	1137.76	4.40111e-18	55558
NVE7302	0.731253	31.6213	0.00202751	122152
NVE7303	1.4086	80.5474	1.87058e-08	245957
NVE7346	0.395704	3361.66	1.28241e-05	122234
NVE7368	0.201756	34.1947	0.00947581	No data
NVE7451	1.24777	45.0372	3.91917e-06	No data
NVE7481	0.338984	504.111	0.0040038	88731
NVE7535	0.3569	315.736	0.00370587	66221
NVE7575	1.52705	92.9283	1.08133e-08	122369
NVE7600	0.892711	13.3439	0.00315059	122621
NVE7630	0.770525	32.463	0.00443072	214085
NVE7656	1.90927	53.312	5.36294e-11	No data
NVE7679	0.69023	90.3335	0.000201436	122819
NVE773	2.63088	114.048	1.91837e-15	No data
NVE7737	1.86539	241.126	1.42876e-34	246058
NVE774	2.42787	192.786	7.41482e-38	5231
NVE7745	0.431779	192.545	0.00427036	230488
NVE7805	0.689319	60.3503	0.000697871	246089
NVE7949	1.32308	527.725	6.72774e-22	172038
NVE8017	1.19238	31.2605	0.000138724	237852
NVE8024	1.27024	252.885	4.10053e-13	33294
NVE8066	0.948322	845.201	1.47829e-11	231726
NVE8154	0.432643	243.175	0.00802791	80101
NVE8157	0.276119	295.229	0.00866805	79745
NVE8165	0.68974	27.4235	0.00409437	No data
NVE8207	1.01426	101.51	3.16881e-05	80250
NVE8238	0.403336	709.919	0.000173288	80075
NVE8294	1.24431	182.15	6.1418e-11	60521
NVE8320	1.32837	47.8332	6.69534e-06	239810
NVE8325	2.65819	727.659	2.27085e-19	No data
NVE8326	3.58959	1130.05	7.34486e-37	239814
NVE8351	1.3623	149.503	1.8932e-08	200262
NVE8352	0.521256	64.0439	0.00526888	200262
NVE8400	0.865665	199.937	1.20481e-06	239850
NVE8416	0.791916	47.8381	0.00115241	No data
NVE8417	0.747497	143.265	0.000156323	No data
NVE8427	2.36793	151.206	4.57304e-26	214437
NVE8428	1.0509	34.7591	0.00130309	123507
NVE8486	0.402938	61.8721	0.00987428	147476
NVE8500	1.44121	104.761	8.3308e-09	233376
NVE856	1.63871	135.564	1.35582e-12	244014
NVE8583	2.45457	18.9557	7.26718e-07	222889
NVE8584	1.62089	57.7594	3.2235e-05	222889
NVE8585	1.87167	4.37051	0.00290112	No data
NVE878	0.39456	448.381	0.000621118	237075
NVE8855	0.825287	47.6433	0.000468306	161411
NVE89	4.33049	411.633	7.03355e-124	60470
NVE8916	2.02067	19.1612	7.66802e-07	No data
NVE8947	1.79232	23.506	1.56856e-07	200471
NVE8962	0.332479	255.919	0.00588108	246296
NVE897	1.52816	490.896	5.58463e-11	244037
NVE898	2.09827	105.059	3.34136e-14	No data
NVE8989	0.521124	29.7939	0.00898108	124414
NVE90	3.41712	50.1558	4.31281e-22	No data
NVE900	1.6875	2956.67	2.21075e-09	111441
NVE901	1.75997	824.389	1.79415e-09	No data
NVE903	0.908409	19.1583	0.00288377	244038
NVE9231	1.82905	493.164	6.17464e-25	72011
NVE9312	0.317381	1582.94	0.00454392	172604
NVE9316	3.16001	6.10283	9.38689e-05	246444
NVE9331	0.3491	1733.86	0.00300165	191841
NVE936	0.407	102.957	0.00443815	244043
NVE9376	1.59821	484.823	2.90722e-11	40426
NVE9377	0.54828	102.749	0.00485029	125484
NVE9378	0.924941	26.8014	0.00210894	125484
NVE9379	1.46602	68.713	1.00237e-07	125484
NVE939	0.690065	174.07	6.29508e-05	187706
NVE940	0.375363	220.268	0.000857554	209432
NVE9419	1.47635	45.9216	4.43956e-09	89722
NVE945	2.55847	66.1325	1.9796e-15	No data
NVE9452	0.348022	820.228	0.000304753	180776
NVE9500	3.14911	2.89839	0.00131946	89862
NVE9565	2.38129	41.2905	2.10156e-12	No data
NVE9725	2.66362	895.437	3.34886e-49	125997
NVE9739	1.92248	23.8144	4.94451e-08	No data
NVE9740	1.44438	50.6976	7.59219e-06	No data
NVE9748	0.732458	26.5162	0.00345163	3535
NVE9859	0.508065	43.812	0.00630853	126198
NVE996	1.66918	80.5987	2.93516e-11	No data
NVE9976	0.861049	521.396	2.42093e-06	No data
NVE999	0.742092	68.5917	0.00016455	No data
