# Supplementary material for: Cnidarian hair cell development illuminates an ancient role for the class IV POU transcription factor in defining mechanoreceptor identity
Source: eLife. 2021 Dec 23;10:e74336. doi: 10.7554/eLife.74336 (PMC8846589; doi:10.7554/eLife.74336)
Supplement: Supplementary file 4. [file elife-74336-supp4.xlsx]

## Sheet: Sheet 1 - GO_enrichment_terms_i
GO_enrichment_terms_in_downregulated_genes
Description	GeneRatio	pvalue	p.adjust
synaptic transmission	26/326	1.71609e-10	2.13481e-07
detection of stimulus	8/326	3.18496e-08	1.98104e-05
calcium ion transport	13/326	8.91512e-08	3.6968e-05
positive regulation of heart rate involved in baroreceptor response to decreased systemic arterial blood pressure	6/326	2.4655e-07	6.13416e-05
generation of ovulation cycle rhythm	6/326	2.4655e-07	6.13416e-05
neuronal action potential	8/326	3.29105e-07	6.41947e-05
cellular calcium ion homeostasis	11/326	3.61224e-07	6.41947e-05
regulation of norepinephrine secretion	6/326	4.22912e-07	6.57628e-05
inositol phosphate metabolic process	9/326	5.666e-07	7.83167e-05
regulation of synaptic transmission, dopaminergic	6/326	1.08353e-06	0.000122145
signal transduction	30/326	1.08396e-06	0.000122145
cation transmembrane transport	13/326	1.23059e-06	0.000122145
regulation of light-activated channel activity	7/326	1.27643e-06	0.000122145
negative regulation of peptidyl-threonine phosphorylation	7/326	1.71155e-06	0.000133073
metarhodopsin inactivation	7/326	1.71155e-06	0.000133073
negative regulation of tumor necrosis factor production	7/326	1.71155e-06	0.000133073
adaptation of rhodopsin mediated signaling	7/326	2.26412e-06	0.000150112
establishment of meiotic spindle orientation	7/326	2.26412e-06	0.000150112
response to amphetamine	8/326	2.33237e-06	0.000150112
negative regulation of interleukin-1 beta production	6/326	2.41338e-06	0.000150112
detection of calcium ion	8/326	2.87457e-06	0.000170284
behavioral response to nicotine	6/326	3.45748e-06	0.000187004
dopamine biosynthetic process	6/326	3.45748e-06	0.000187004
sensory perception of sound	18/326	4.23377e-06	0.00020251
muscle contraction	12/326	4.44026e-06	0.00020251
positive regulation of cyclic-nucleotide phosphodiesterase activity	7/326	4.88369e-06	0.00020251
kinetochore organization	7/326	4.88369e-06	0.00020251
regulation of ovulation	7/326	4.88369e-06	0.00020251
positive regulation of ryanodine-sensitive calcium-release channel activity	7/326	4.88369e-06	0.00020251
regulation of cell communication by electrical coupling involved in cardiac conduction	7/326	4.88369e-06	0.00020251
B cell activation	6/326	6.64425e-06	0.00025976
long-term memory	12/326	6.68194e-06	0.00025976
response to stimulus	23/326	7.32681e-06	0.00026353
positive regulation of protein autophosphorylation	7/326	7.75322e-06	0.00026353
positive regulation of phosphoprotein phosphatase activity	7/326	7.75322e-06	0.00026353
negative regulation of ryanodine-sensitive calcium-release channel activity	7/326	7.75322e-06	0.00026353
regulation of filopodium assembly	9/326	7.8381e-06	0.00026353
negative regulation of interleukin-6 production	6/326	8.95534e-06	0.000285652
regulation of store-operated calcium channel activity	6/326	8.95534e-06	0.000285652
nitric oxide metabolic process	7/326	9.64303e-06	0.000292584
photoreceptor cell axon guidance	7/326	9.64303e-06	0.000292584
regulation of cardiac muscle contraction by regulation of the release of sequestered calcium ion	8/326	1.05588e-05	0.000312742
single-multicellular organism process	19/326	1.34475e-05	0.00038904
regulation of response to DNA damage stimulus	7/326	1.45757e-05	0.000412094
positive regulation of peptidyl-threonine phosphorylation	7/326	1.77309e-05	0.000490162
actin filament-based movement	8/326	2.69262e-05	0.000728179
inner ear receptor cell development	6/326	3.21582e-05	0.000851166
synaptic transmission, cholinergic	7/326	3.65188e-05	0.000927131
associative learning	7/326	3.65188e-05	0.000927131
potassium ion transport	8/326	4.09684e-05	0.000999308
chloride transmembrane transport	8/326	4.09684e-05	0.000999308
glycogen catabolic process	7/326	4.31553e-05	0.00101293
positive regulation of NFAT protein import into nucleus	7/326	4.31553e-05	0.00101293
regulation of high voltage-gated calcium channel activity	6/326	4.95917e-05	0.00114244
sensory perception of sour taste	4/326	5.71968e-05	0.00127059
potassium ion export	4/326	5.71968e-05	0.00127059
chloride transport	6/326	7.38696e-05	0.00158438
positive regulation of nitric-oxide synthase activity	6/326	7.38696e-05	0.00158438
activation of phospholipase C activity	7/326	8.03413e-05	0.00166574
regulation of cytokinesis	7/326	8.03413e-05	0.00166574
innervation	5/326	8.22886e-05	0.00167815
positive regulation of cellular process	21/326	8.55101e-05	0.00171572
action potential	6/326	8.91272e-05	0.00175991
hemostasis	5/326	0.000105927	0.0020157
male courtship behavior	7/326	0.000106936	0.0020157
cell surface receptor signaling pathway	14/326	0.000106942	0.0020157
neuron projection guidance	5/326	0.000134449	0.00249633
muscle cell cellular homeostasis	9/326	0.000144316	0.00264013
apoptotic cell clearance	7/326	0.000159858	0.00288209
regulation of ion transmembrane transport	8/326	0.000171712	0.00305158
cochlea development	6/326	0.000176946	0.00310029
detection of chemical stimulus involved in sensory perception of sour taste	4/326	0.000184098	0.0031618
cation transport	10/326	0.00018554	0.0031618
regulation of synaptic growth at neuromuscular junction	7/326	0.00020565	0.00338901
positive regulation of protein dephosphorylation	7/326	0.00020565	0.00338901
activation of adenylate cyclase activity	6/326	0.000207046	0.00338901
substantia nigra development	9/326	0.000226302	0.0036561
positive regulation of acrosome reaction	4/326	0.000252961	0.0040344
centriole replication	7/326	0.000293637	0.00462386
gamma-aminobutyric acid signaling pathway	5/326	0.000310797	0.00482785
T cell activation	6/326	0.000322116	0.00482785
behavioral response to ethanol	6/326	0.000322116	0.00482785
response to corticosterone	6/326	0.000322116	0.00482785
organ development	18/326	0.000344832	0.0051068
positive regulation of protein serine/threonine kinase activity	7/326	0.000409581	0.00599435
response to food	6/326	0.000423135	0.0061207
synaptic transmission, GABAergic	4/326	0.00044306	0.00633524
rhabdomere development	7/326	0.000455463	0.00643859
memory	8/326	0.000493286	0.00681831
regulation of membrane potential	8/326	0.000493286	0.00681831
ion transport	9/326	0.000507425	0.00693667
negative regulation of inflammatory response	6/326	0.000547312	0.00740061
protein heterooligomerization	8/326	0.000636618	0.00851562
single organism signaling	9/326	0.000730293	0.00966473
positive regulation of angiogenesis	8/326	0.000811817	0.0106305
activation of MAPK activity	7/326	0.000823919	0.0106766
platelet degranulation	7/326	0.000903362	0.0115029
response to abiotic stimulus	10/326	0.000906174	0.0115029
regulation of apoptotic process	10/326	0.000962238	0.0120912
cellular component movement	10/326	0.00108291	0.0134714
positive regulation of DNA binding	6/326	0.00109441	0.0134797
potassium ion transmembrane transport	5/326	0.00112653	0.0137393
cellular response to acidic pH	4/326	0.00132738	0.0160316
peroxisome localization	3/326	0.00138237	0.0163778
kidney epithelium development	3/326	0.00138237	0.0163778
protein metabolic process	9/326	0.00160018	0.0187795
sperm motility	6/326	0.00198696	0.0231008
regulation of heart rate	7/326	0.00223804	0.0257789
single-organism behavior	8/326	0.00235205	0.0268436
metanephros development	5/326	0.00237368	0.0268442
neuromuscular junction development	8/326	0.00266644	0.0298833
single-organism transport	12/326	0.0029769	0.0330649
starch metabolic process	3/326	0.0031258	0.0344115
spindle assembly involved in mitosis	7/326	0.003202	0.0349412
cerebral cortex development	6/326	0.00334392	0.0361661
ion transmembrane transport	11/326	0.0033724	0.0361661
positive regulation of apoptotic cell clearance	4/326	0.00348234	0.0370259
membrane organization	8/326	0.00359676	0.0379184
vascular process in circulatory system	3/326	0.0039093	0.0405264
Golgi localization	3/326	0.0039093	0.0405264
immune response	8/326	0.00426485	0.0438469
regulation of biological process	10/326	0.00430239	0.0438702
phagocytosis, recognition	4/326	0.00454168	0.0459337
