# Supplementary material for: Cnidarian hair cell development illuminates an ancient role for the class IV POU transcription factor in defining mechanoreceptor identity
Source: eLife. 2021 Dec 23;10:e74336. doi: 10.7554/eLife.74336 (PMC8846589; doi:10.7554/eLife.74336)
Supplement: Supplementary file 5. [file elife-74336-supp5.xlsx]

## Sheet: Sheet 1 - GO_enrichment_terms_i
GO_enrichment_terms_in_upregulated_genes
Description	GeneRatio	pvalue	p.adjust
proteolysis	28/367	1.1577e-07	0.000171224
activation of signaling protein activity involved in unfolded protein response	10/367	2.6017e-06	0.00160931
peptide catabolic process	6/367	3.26431e-06	0.00160931
positive regulation of epithelial cell migration	8/367	5.60686e-06	0.00207314
signal peptide processing	5/367	1.39193e-05	0.0034311
dorsal/ventral pattern formation, imaginal disc	5/367	1.39193e-05	0.0034311
germarium-derived egg chamber formation	6/367	6.2335e-05	0.00998231
positive regulation of epithelial to mesenchymal transition	8/367	6.2377e-05	0.00998231
multicellular organism reproduction	7/367	6.52454e-05	0.00998231
regulation of cell fate specification	6/367	7.75736e-05	0.00998231
regulation of cellular component organization	11/367	8.22455e-05	0.00998231
extracellular matrix organization	19/367	8.78435e-05	0.00998231
epithelial tube morphogenesis	6/367	9.5639e-05	0.00998231
regulation of behavior	5/367	0.000110239	0.00998231
G-protein coupled glutamate receptor signaling pathway	4/367	0.0001396	0.00998231
peripheral nervous system axon regeneration	4/367	0.0001396	0.00998231
segmentation	4/367	0.0001396	0.00998231
formation of anatomical boundary	4/367	0.0001396	0.00998231
fin morphogenesis	6/367	0.000141737	0.00998231
regulation of cellular component biogenesis	6/367	0.000141737	0.00998231
reproductive structure development	6/367	0.000141737	0.00998231
endoplasmic reticulum unfolded protein response	7/367	0.000167872	0.0112856
regulation of stem cell differentiation	4/367	0.000205022	0.0131508
cell fate determination	7/367	0.000222292	0.0131508
regulation of immune system process	7/367	0.000222292	0.0131508
cardiac atrium morphogenesis	4/367	0.000289956	0.0158914
developmental growth	7/367	0.000290106	0.0158914
glial cell differentiation	6/367	0.000335237	0.0177077
glutathione biosynthetic process	5/367	0.000361204	0.0178073
crystal cell differentiation	5/367	0.000361204	0.0178073
divalent inorganic cation transport	4/367	0.000397467	0.018963
cardiac ventricle morphogenesis	5/367	0.000441752	0.0190001
bradykinin catabolic process	5/367	0.000441752	0.0190001
wing disc pattern formation	5/367	0.000441752	0.0190001
intra-Golgi vesicle-mediated transport	6/367	0.000454368	0.0190001
chaeta development	7/367	0.000475323	0.0190001
chordate embryonic development	7/367	0.000475323	0.0190001
heart valve morphogenesis	4/367	0.000530698	0.0196225
ovarian follicle cell migration	4/367	0.000530698	0.0196225
zinc ion transmembrane transport	4/367	0.000530698	0.0196225
chaperone-mediated protein folding	5/367	0.000642578	0.0231798
cellular protein metabolic process	13/367	0.000689279	0.0238048
pancreas development	6/367	0.000692092	0.0238048
COPI coating of Golgi vesicle	5/367	0.000765405	0.0257281
toll-like receptor signaling pathway	6/367	0.000897446	0.029496
positive regulation of cellular process	20/367	0.00107783	0.0346137
folic acid-containing compound metabolic process	4/367	0.00111694	0.0346137
retrograde vesicle-mediated transport, Golgi to ER	6/367	0.00114677	0.0346137
cellular response to interleukin-1	6/367	0.00114677	0.0346137
cell-cell signaling	9/367	0.00126403	0.0373901
regulation of mitotic cell cycle	6/367	0.00128975	0.0374028
coronary vasculature morphogenesis	4/367	0.00138539	0.0386584
kidney development	10/367	0.0014375	0.0386584
inter-male aggressive behavior	5/367	0.0014376	0.0386584
regulation of Notch signaling pathway	5/367	0.0014376	0.0386584
cellular response to estrogen stimulus	4/367	0.00169579	0.044787
protein folding	8/367	0.00173045	0.0449006
rhythmic behavior	3/367	0.00194344	0.0479058
hyaluronan catabolic process	3/367	0.00194344	0.0479058
Malpighian tubule development	3/367	0.00194344	0.0479058
phagosome maturation	4/367	0.00205135	0.0497368
