# Supplementary material for: Cnidarian hair cell development illuminates an ancient role for the class IV POU transcription factor in defining mechanoreceptor identity
Source: eLife. 2021 Dec 23;10:e74336. doi: 10.7554/eLife.74336 (PMC8846589; doi:10.7554/eLife.74336)
Supplement: Supplementary file 6. [file elife-74336-supp6.xlsx]

## Sheet: Sheet 1 - downregulated_genes_w
downregulated_genes_with_peaks
gene	fold_change	mean_counts	pvalue	JGI_ID
NVE10005	-1.55558	24.0653	6.35367e-05	246627
NVE10079	-2.32145	29.6023	1.22926e-12	No data
NVE10237	-1.30127	24.215	7.48585e-05	215748
NVE10252	-4.45017	259.207	2.00005e-51	127428
NVE10564	-0.833155	16.7286	0.00474749	246802
NVE10999	-1.21486	109.671	4.99884e-09	216224
NVE11003	-3.3384	15.5315	2.01519e-08	No data
NVE11189	-0.581703	89.4214	0.000720141	ENSRNA022755290
NVE11310	-3.85591	7.40812	4.03391e-06	201172
NVE11585	-0.745604	13.2175	0.00660024	129471
NVE11709	-0.385458	89.4445	0.00758884	No data
NVE11748	-1.14716	1695.25	1.60577e-07	91324
NVE11870	-1.32497	119.877	1.62774e-09	129955
NVE11877	-1.59717	28.7259	6.15982e-08	247137
NVE12020	-2.09372	30.4519	3.05663e-06	130363
NVE12025	-0.822774	27.292	0.00167493	247200
NVE12047	-2.62761	43.4037	4.39053e-14	216955
NVE12063	-0.912237	73.9607	2.43139e-06	130406
NVE12065	-3.94766	22.2897	1.2646e-11	130395
NVE12189	-2.10687	10.9521	6.78847e-05	201513
NVE12483	-3.7889	9.46961	5.49775e-07	92266
NVE12661	-2.45228	9.26195	2.33134e-05	131398
NVE12748	-0.511134	178.29	0.00282991	174288
NVE1276	-1.57423	241.678	4.46616e-10	No data
NVE12832	-0.969979	57.4481	1.06413e-05	No data
NVE12924	-0.680087	693.815	6.24655e-06	196786
NVE12981	-0.657294	411.922	1.62049e-06	158359
NVE13075	-1.48022	110.333	6.41807e-15	92483
NVE13098	-1.02775	81.6302	2.49158e-07	No data
NVE13105	-3.10735	63.9082	1.65264e-25	240477
NVE13277	-0.730436	994.19	1.14452e-06	10122
NVE13502	-1.08519	71.2132	1.46397e-07	201851
NVE13828	-0.503752	126.883	0.000689854	247591
NVE14201	-0.370921	22793.3	0.00683026	234494
NVE14207	-1.2151	30.9467	0.00020935	202189
NVE14465	-1.0735	157.47	5.11493e-09	No data
NVE14742	-0.547097	108.192	0.000698393	194134
NVE14757	-1.24291	36.2782	8.64463e-06	40806
NVE14758	-2.90924	19.6375	1.90556e-11	40919
NVE14933	-0.408721	525.7	0.0099691	234521
NVE15020	-1.79696	125.446	1.40527e-22	218539
NVE15071	-3.11373	75.8602	6.6466e-23	18391
NVE15196	-5.09558	61.8986	6.08424e-30	202575
NVE15528	-1.04777	39.4131	0.00126206	94679
NVE1571	-0.429644	165.156	0.00457158	209875
NVE15836	-3.34212	21.4986	6.50886e-10	202855
NVE15847	-0.455396	46.8368	0.00904811	202865
NVE15933	-1.88688	10.5142	0.000132859	247953
NVE16015	-3.52998	109.384	1.10254e-07	247995
NVE16297	-0.629518	2150.53	0.00503909	39805
NVE1662	-0.92665	16.8208	0.00130261	209965
NVE16848	-0.962859	15.6006	0.00186615	203229
NVE17011	-0.79427	32.7713	0.000887695	42930
NVE17233	-0.697306	54.718	0.000746259	219625
NVE17309	-0.561032	157.582	7.3197e-05	163663
NVE17821	-0.507854	118.36	0.00222289	97297
NVE17822	-1.10241	8.6875	0.0041733	53909
NVE18050	-1.04062	82.5791	1.19886e-07	203853
NVE18231	-1.55648	29.0234	7.85737e-07	No data
NVE18816	-0.645025	240.316	1.4419e-05	220271
NVE18817	-1.94733	128.158	1.07118e-22	139887
NVE1882	-1.33647	6.81543	0.00250961	113283
NVE18950	-2.0534	8.50876	0.000139781	No data
NVE18953	-1.82751	107.401	2.0256e-08	No data
NVE19042	-0.747451	26.4687	0.00218613	158857
NVE19182	-0.856188	425.24	9.83101e-08	204357
NVE19204	-3.66795	22.7561	1.33938e-13	204381
NVE19357	-0.431688	154.313	0.00109557	204447
NVE19361	-1.48673	157.032	5.63199e-14	98897
NVE19371	-4.06783	40.2868	6.59295e-22	No data
NVE19423	-6.79028	47.5071	9.05612e-17	No data
NVE20065	-2.84194	100.598	7.96713e-17	140859
NVE20352	-0.449747	393.095	0.00216893	100237
NVE20457	-2.33453	18.1501	2.99695e-07	No data
NVE20918	-2.04654	59.2356	6.83055e-15	No data
NVE20937	-0.334455	152.748	0.00923392	238488
NVE20954	-0.915898	38.9523	0.000218282	238501
NVE21075	-1.38819	128.23	1.34935e-11	82509
NVE21082	-0.466069	76.4735	0.00413146	197698
NVE21139	-0.929102	89.4878	5.87557e-06	No data
NVE21233	-0.711988	98.583	0.000424799	229212
NVE21294	-1.72178	64.5359	6.60538e-10	205658
NVE21425	-2.42996	96.5866	1.36076e-20	205746
NVE21616	-2.45651	32.4385	8.82259e-09	102323
NVE21628	-1.13391	327.208	3.57977e-13	76387
NVE2179	-0.494285	191.121	0.00224862	198924
NVE21884	-0.560846	102.757	0.000536401	58280
NVE2194	-1.28881	174.962	7.03378e-07	160201
NVE22155	-0.665021	17.9802	0.0061159	206332
NVE22380	-3.7807	30.066	4.48805e-17	238609
NVE22714	-4.62874	92.605	6.2607e-41	No data
NVE24039	-1.74932	78.6713	3.81183e-13	198106
NVE24166	-4.50738	32.5173	2.05954e-18	207417
NVE24215	-0.379141	268.569	0.00177354	106212
NVE24279	-2.83912	13.3807	2.88509e-08	No data
NVE244	-2.35933	256.639	8.46659e-41	No data
NVE24403	-0.670829	271.172	0.000115403	207612
NVE2456	-0.454651	563.085	0.000778832	No data
NVE24603	-6.28405	14.9717	2.0894e-09	No data
NVE24622	-3.46057	78.0903	2.46087e-35	207789
NVE24708	-0.311329	443.541	0.00692671	243313
NVE24983	-2.06192	17.4318	1.23021e-06	107944
NVE2500	-0.656725	193.4	3.01171e-05	114299
NVE2514	-2.55982	110.305	1.07286e-29	114289
NVE25279	-0.603538	54.7323	0.00122269	238886
NVE25407	-0.772557	25.4472	0.00251448	221670
NVE25590	-0.700598	113.297	2.77524e-05	No data
NVE26	-0.741571	471.639	2.70092e-09	237703
NVE26033	-1.7024	46.7837	2.32497e-10	208825
NVE26093	-0.485473	143.826	0.00148415	208887
NVE26153	-1.11944	42.3114	3.21075e-05	No data
NVE26205	-1.53185	242.283	1.03614e-14	51194
NVE265	-0.644949	312.282	0.000816895	No data
NVE2721	-2.27382	8.5491	5.50671e-05	114697
NVE2985	-0.633042	96.6903	0.000425328	239271
NVE3072	-2.48942	52.2802	6.09456e-19	199202
NVE3410	-2.83379	110.729	7.65162e-37	211237
NVE3483	-2.65454	94.59	5.80324e-23	211310
NVE3484	-3.3811	4.32656	0.000260301	211311
NVE3726	-0.913298	238.353	5.54567e-07	244930
NVE3791	-2.42846	18.8226	5.66995e-07	239358
NVE3813	-1.48827	89.8111	6.33065e-11	199281
NVE3963	-2.31576	25.2634	8.22861e-10	No data
NVE4023	-5.8994	11.5693	4.26826e-08	211633
NVE4205	-2.86242	77.8235	1.84737e-22	211784
NVE4226	-0.80547	113.283	0.000557285	No data
NVE426	-1.44739	74.2102	8.09826e-08	110350
NVE4682	-0.357453	649.131	0.00438866	160716
NVE4689	-2.10886	11.0926	0.000112475	199475
NVE4699	-3.04731	7.71171	0.000160348	199494
NVE5212	-1.64559	69.212	2.5446e-06	118978
NVE5369	-1.31048	38.929	0.000188408	248720
NVE5442	-0.652558	2215.69	6.61344e-07	160849
NVE5496	-0.748104	103.429	2.25593e-05	87664
NVE5666	-0.807889	461.171	4.61353e-05	245480
NVE5705	-2.29842	33.0486	1.86243e-12	16535
NVE646	-0.707182	88.5758	0.000152276	110819
NVE6606	-0.716602	82.8643	3.32585e-05	213425
NVE6699	-0.438536	470.138	0.000246616	21645
NVE6913	-0.713748	301.488	1.92769e-05	239698
NVE6935	-1.62564	86.5502	3.04415e-06	No data
NVE6936	-1.85311	88.8706	2.7209e-15	88459
NVE6946	-3.00866	2203.45	8.1546e-21	64340
NVE7055	-0.569997	325.392	1.56057e-06	213684
NVE7338	-0.885494	74.8991	4.92462e-05	No data
NVE7374	-1.4266	23.1623	0.000458659	213968
NVE7531	-2.59959	26.804	2.19628e-07	200128
NVE7532	-2.01714	47.3414	6.47652e-09	88765
NVE7534	-1.67697	37.605	3.01738e-09	239769
NVE7792	-0.392171	658.086	0.00121251	24063
NVE8090	-1.89522	110.658	4.37649e-18	80003
NVE8093	-3.93683	15.0991	6.83235e-09	196495
NVE8149	-0.344164	192.324	0.00664925	79767
NVE8332	-0.560383	107.28	0.000967371	88970
NVE8568	-1.93521	120.585	2.00268e-27	123804
NVE8763	-0.333273	387.912	0.00149135	246278
NVE9332	-0.650145	143.093	0.00130475	215113
NVE9416	-1.09304	94.8179	5.22727e-09	239933
NVE9474	-0.920259	44.8222	6.14712e-05	200577
NVE9613	-1.11905	30.5587	0.000229003	237402
NVE9615	-0.334584	9.09182	0.00979523	125711
NVE967	-0.131162	3.17052	0.0029898	No data
NVE9704	-0.302109	306.89	0.00901233	125899
NVE9906	-0.409374	252.465	0.00151605	200670
NVE9926	-1.12562	19.5384	0.000333794	240018
NVE10097	-0.352817	609.775	0.0079834	126489
NVE10859	-0.324937	160.618	0.00638815	240153
NVE10898	-2.43141	509.359	7.75268e-36	240186
NVE11524	-4.48952	7.9735	2.07864e-06	129339
NVE11525	-0.0728063	2.22617	0.0025191	56135
NVE11581	-2.10802	7.69479	0.000662366	247064
NVE11586	-0.794706	21.1741	0.00320695	129459
NVE12652	-0.821634	24.4404	0.0017155	131315
NVE12662	-1.85375	6.92769	0.000784696	131398
NVE1277	-1.46462	37.4028	2.04127e-08	198676
NVE13074	-0.483765	66.0917	0.00859603	201686
NVE13116	-0.433275	217.417	0.000484077	92366
NVE13208	-0.578777	130.82	0.000873772	131788
NVE13272	-0.599303	257.385	0.000285642	131887
NVE14190	-0.2748	511.358	0.00635385	202173
NVE1444	-0.485224	257.362	8.75122e-05	227023
NVE1461	-0.595605	64.2872	0.00117483	244148
NVE14851	-0.442744	58.0644	0.00612092	No data
NVE1486	-2.21242	163.841	2.39165e-38	No data
NVE1489	-1.76441	61.6297	1.95209e-11	No data
NVE1494	-4.45306	189.317	5.67124e-44	No data
NVE14954	-1.28117	132.125	2.19026e-08	135045
NVE15110	-3.1176	9.35783	1.04046e-05	135550
NVE15182	-0.614709	364.527	0.000175333	59988
NVE15332	-0.443422	160.299	0.00100982	218759
NVE15334	-0.584366	279.825	4.67403e-05	135889
NVE15383	-0.708136	37.8599	0.002098	136007
NVE15473	-0.588205	47.1743	0.00503123	202690
NVE15617	-0.546673	337.292	0.000102342	247892
NVE15868	-0.892194	86.1489	1.1422e-06	202891
NVE1605	-1.16142	594.994	6.78208e-07	244207
NVE16337	-1.0261	213.771	5.78169e-11	238169
NVE16880	-1.92976	47.6505	1.70104e-07	No data
NVE16899	-0.85058	65.3169	8.70418e-05	219438
NVE17685	-0.381282	1414.32	6.8648e-05	174
NVE17811	-0.508513	88.0492	0.00137748	60191
NVE18010	-1.4043	21.6371	0.000102555	241459
NVE18051	-0.483233	567.478	8.27714e-05	164057
NVE18161	-0.498656	203.273	0.00105849	219985
NVE18226	-1.50035	44.4601	1.2964e-09	248233
NVE18474	-0.323625	262.909	0.00781183	98014
NVE18975	-2.4663	132.493	1.07039e-31	82227
NVE19	-0.225532	847.959	0.00960353	79108
NVE19127	-1.0657	59.8756	9.40529e-05	197466
NVE19227	-2.64028	21.5769	2.48546e-11	98484
NVE19345	-2.01859	36.6393	3.92575e-12	204434
NVE19607	-0.668014	91.7287	0.000223672	99167
NVE19737	-0.396136	633.169	0.000976831	241879
NVE19959	-0.802224	32.5605	0.00190434	204856
NVE19980	-1.6503	55.2769	3.12628e-11	24362
NVE20107	-0.478363	549.547	0.000178417	242002
NVE2055	-0.721469	73.4968	0.000389819	86018
NVE2081	-2.76293	75.832	3.14455e-18	239118
NVE2103	-6.15584	13.3343	6.12868e-09	85719
NVE21040	-1.43195	54.7232	1.24821e-08	238559
NVE21249	-1.57568	80.9474	5.693e-11	101764
NVE2142	-1.0109	92.8145	2.31009e-05	35366
NVE2155	-3.53122	5.56423	0.000131286	31824
NVE2168	-1.55284	58.051	1.49277e-09	85928
NVE21877	-0.315326	622.851	0.00516372	206093
NVE22292	-0.242706	4888.5	0.00821155	229336
NVE22513	-1.27406	86.6218	7.3939e-06	83526
NVE22596	-0.806462	33.7293	0.0020514	44401
NVE22966	-1.44079	19.1914	5.90431e-05	No data
NVE22991	-1.12355	47.3816	8.17499e-07	104479
NVE2362	-2.08731	37.0756	1.08565e-08	50409
NVE24026	-1.50185	8.75367	0.00131655	198093
NVE24544	-0.273953	592.385	0.00710145	243274
NVE24596	-0.990281	41.4115	0.000225486	73945
NVE25007	-0.733659	231.289	2.48425e-05	20238
NVE25127	-0.693492	67.4491	0.000460294	243483
NVE25179	-0.5094	310.188	0.00290047	248647
NVE25219	-0.633396	220.424	0.00415687	60642
NVE25496	-1.88131	726.959	2.06207e-35	21107
NVE25498	-1.19872	619.621	4.08266e-06	208381
NVE25773	-0.437953	140.437	0.00413213	243657
NVE25893	-1.21161	17.5587	0.000805369	208687
NVE26201	-0.427578	179.441	0.00179253	243823
NVE2712	-0.663053	24.7435	0.00318358	114647
NVE3169	-0.559435	123.601	0.000224616	115361
NVE3300	-0.467864	413.443	0.00148262	115565
NVE3539	-1.39352	10.6741	0.000515342	15147
NVE3646	-0.400993	187.908	0.0025221	230093
NVE3778	-1.47427	191.199	3.7599e-11	No data
NVE3823	-0.440321	477.539	0.002404	63580
NVE3825	-1.53637	275.163	5.0753e-26	87003
NVE4432	-0.48489	1161.64	0.00129143	189628
NVE4655	-1.96239	75.2328	2.00066e-11	No data
NVE4695	-3.89504	23.2156	5.86334e-12	199481
NVE47	-2.57972	1591.94	3.94361e-60	237717
NVE4822	-0.381972	157.08	0.00628946	118173
NVE4945	-0.844718	152.955	3.90002e-07	189854
NVE5138	-0.595422	490.333	0.000250145	118813
NVE5263	-0.419777	169.307	0.000821525	119080
NVE5346	-1.16358	21.142	0.00110992	212623
NVE5533	-0.360597	347.356	0.00163453	245432
NVE5598	-2.18307	7.1566	0.000330347	119340
NVE5708	-0.125835	37.3557	0.000825672	119695
NVE5911	-1.83257	14.4073	1.22687e-05	171063
NVE6049	-0.942123	24.4106	0.000582871	213090
NVE6218	-0.28401	303.996	0.00668874	30743
NVE6265	-3.65205	56.6563	1.00338e-23	120436
NVE6266	-0.984231	65.9817	4.43379e-07	120467
NVE629	-0.778063	55.1646	0.000589754	110891
NVE633	-3.1094	6.27279	0.000100443	168297
NVE639	-3.04105	6.45666	0.000119861	235182
NVE6443	-0.956502	20.9633	0.00111091	120766
NVE6908	-1.52457	107.411	6.01928e-12	88242
NVE6912	-0.415716	406.269	0.00417529	239698
NVE6967	-8.30364	13.8596	5.85367e-11	213625
NVE6980	-1.43666	25.8596	1.4111e-05	No data
NVE6991	-0.8833	56.6016	1.92997e-05	No data
NVE7139	-2.62916	14.2016	2.3063e-06	No data
NVE7348	-0.720997	762.518	1.82425e-07	45
NVE735	-2.41772	109.635	6.52878e-32	No data
NVE7488	-3.54352	21.8392	3.09976e-13	No data
NVE7617	-0.397309	330.025	0.00121771	122656
NVE7618	-0.320548	424.096	0.00329046	214071
NVE775	-0.618557	21.8	0.00759947	No data
NVE776	-0.636867	47.0383	0.00268515	No data
NVE8232	-1.10202	529.152	2.48572e-13	196642
NVE8254	-1.51353	287.537	1.32005e-23	79820
NVE8353	-1.28484	255.09	1.57004e-17	No data
NVE8844	-0.974294	348.06	7.14321e-06	200349
NVE9166	-1.85065	232.779	1.29047e-16	246382
NVE9202	-1.45651	223.43	5.15622e-11	214990
NVE9269	-0.517921	48.4218	0.00793899	215047
NVE9425	-0.989887	302.667	1.1692e-07	200525
