# Supplementary material for: Cnidarian hair cell development illuminates an ancient role for the class IV POU transcription factor in defining mechanoreceptor identity
Source: eLife. 2021 Dec 23;10:e74336. doi: 10.7554/eLife.74336 (PMC8846589; doi:10.7554/eLife.74336)
Supplement: Supplementary file 7. [file elife-74336-supp7.xlsx]

## Sheet: Sheet 1 - upregulated_genes_wit
upregulated_genes_with_peaks
gene	fold_change	mean_counts	pvalue	JGI_ID
NVE10073	0.928428	84.3052	5.04842e-05	126479
NVE11308	1.2165	53.9635	5.65666e-07	240246
NVE11746	1.78394	93.0102	2.53185e-10	240316
NVE11984	1.49311	801.62	6.37618e-07	247194
NVE12486	1.46175	180.8	1.26125e-11	60648
NVE12650	0.882394	255.506	1.21861e-05	193399
NVE144	1.5288	212.048	1.56213e-09	157790
NVE1559	1.85269	279.593	5.41757e-17	112522
NVE15733	2.52118	654.103	2.85825e-25	136624
NVE16010	1.36165	25.4002	1.5012e-05	No data
NVE16203	1.258	53.9697	3.15422e-05	219238
NVE16204	1.18916	58.5976	2.09744e-05	219239
NVE16448	0.713613	403.237	0.000145872	81540
NVE16464	1.98271	573.855	1.78292e-20	81453
NVE16498	0.434809	332.409	0.00750767	81752
NVE16625	0.618109	67.3222	0.000556621	234572
NVE16780	0.757003	631.784	2.97677e-06	248060
NVE16877	1.93581	116.054	8.0206e-15	241205
NVE17214	1.22041	31.5492	3.61066e-05	No data
NVE17360	1.66092	153.057	3.09756e-12	163734
NVE17415	1.31728	81.923	1.07774e-05	No data
NVE17660	0.721395	289.569	0.00156596	241383
NVE18135	0.661012	54.9378	0.00143446	No data
NVE1849	0.579846	49.0248	0.00659466	244297
NVE18517	0.35049	249.223	0.00499021	98066
NVE18954	1.37049	1714.39	5.33391e-09	39131
NVE18974	1.21371	182.21	1.8994e-07	No data
NVE19037	1.43312	609.743	1.17734e-08	238391
NVE19087	1.30136	40.4557	2.2961e-05	158913
NVE1922	0.545639	58.1865	0.00189542	113453
NVE19567	1.29426	34.9017	2.04818e-05	22127
NVE19588	0.384073	188.378	0.00449062	241849
NVE1974	1.41524	321.79	1.74763e-14	53325
NVE19866	1.01975	105.499	8.10038e-06	195205
NVE20120	0.460685	890.535	0.000175583	99968
NVE20329	3.00696	356.355	5.02091e-30	4663
NVE20437	1.1138	419.836	8.71491e-08	205168
NVE2102	1.34699	136.985	2.00838e-10	239130
NVE21135	2.23566	68.4635	3.13082e-22	165424
NVE21615	1.71553	22.5195	5.75227e-06	No data
NVE21852	2.52142	6.02644	0.000406026	No data
NVE21881	0.461999	376.43	0.00116695	232632
NVE22154	1.70002	519.648	3.16965e-09	No data
NVE22486	1.56899	26.7442	1.85278e-05	No data
NVE22736	1.37256	338.472	5.80877e-16	166263
NVE23050	1.22521	695.127	2.212e-06	57118
NVE24152	1.44214	198.822	9.17127e-16	243139
NVE24201	0.532018	730.733	0.00177166	235000
NVE24260	1.20121	455.873	2.5903e-06	243173
NVE25192	2.95226	117.925	5.95905e-30	198219
NVE25263	2.3977	364.858	1.73776e-21	84204
NVE25277	1.69631	110.36	1.64167e-15	84193
NVE25278	0.813864	167.793	1.22891e-05	238885
NVE25285	1.4924	73.5795	7.21699e-08	238889
NVE25286	0.758712	96.8392	0.000127413	84066
NVE2775	1.46769	5.62349	0.0027333	210850
NVE3643	2.46933	703.622	1.75911e-29	No data
NVE3793	0.63288	76.5422	0.00150219	86975
NVE3844	1.63125	2217.96	3.40766e-14	232014
NVE4053	1.38391	43.0008	2.2474e-08	116714
NVE4084	2.08483	129.991	2.08427e-15	116940
NVE4206	0.423802	190.507	0.0070508	189473
NVE4442	0.876578	115.028	6.93284e-06	211990
NVE5210	1.83791	109.219	5.66008e-18	212516
NVE531	0.777494	793.794	0.000774922	52570
NVE5471	1.54179	1570.19	1.37758e-19	160868
NVE6187	1.1265	71.3162	1.61425e-06	88003
NVE7124	0.931593	219.67	7.21521e-13	213742
NVE7302	0.731253	31.6213	0.00202751	122152
NVE7303	1.4086	80.5474	1.87058e-08	245957
NVE7346	0.395704	3361.66	1.28241e-05	122234
NVE8351	1.3623	149.503	1.8932e-08	200262
NVE8416	0.791916	47.8381	0.00115241	No data
NVE8427	2.36793	151.206	4.57304e-26	214437
NVE9231	1.82905	493.164	6.17464e-25	72011
NVE9312	0.317381	1582.94	0.00454392	172604
NVE9725	2.66362	895.437	3.34886e-49	125997
NVE9739	1.92248	23.8144	4.94451e-08	No data
NVE9976	0.861049	521.396	2.42093e-06	No data
NVE10008	1.24304	115.419	1.30618e-06	215519
NVE10024	0.327739	605.161	0.00748443	227384
NVE10598	1.09729	249.669	1.98666e-08	215949
NVE10637	0.919237	287.465	5.38938e-07	246830
NVE10640	1.01801	57.2153	1.28297e-05	13724
NVE10788	0.447555	154.876	0.00183443	234362
NVE10951	1.77315	252.108	6.06976e-11	128520
NVE11004	1.47871	96.8483	1.59115e-06	246912
NVE1109	0.302928	324.812	0.00967377	168568
NVE11184	0.423788	644.895	0.000189303	246966
NVE11539	0.298034	220.013	0.00868332	247046
NVE11556	2.14746	43.372	1.3683e-10	216602
NVE11707	1.88845	241.209	1.54416e-16	240295
NVE11985	1.37415	454.013	6.66132e-07	247194
NVE12148	0.504684	1043.23	0.00167559	No data
NVE1248	0.793155	230.247	0.000148832	239035
NVE12492	0.300588	372.324	0.00974335	181511
NVE12607	1.45196	122.062	8.59021e-10	No data
NVE12627	0.334498	600.743	0.00696506	10204
NVE12723	0.515477	104.874	0.00186	131533
NVE12762	0.430018	390.567	0.00457288	131609
NVE12771	1.0437	18.96	0.00102759	217449
NVE12901	0.556753	32.7467	0.0063006	No data
NVE13073	1.89393	32.5327	2.15425e-08	92539
NVE14968	0.526869	157.166	0.000479975	135116
NVE15493	0.483903	50.7236	0.0039058	94752
NVE15649	2.00631	129.902	3.0782e-17	136469
NVE15651	1.08822	405.698	0.000243064	247901
NVE15734	0.67419	1004.85	2.88414e-06	218982
NVE16263	0.069328	1.9987	0.00954909	No data
NVE16303	1.7931	218.55	1.63114e-17	81344
NVE16481	0.256574	985.282	0.00736848	81294
NVE16645	0.553683	874.635	1.50231e-05	95571
NVE16862	1.61818	163.93	2.25635e-12	232363
NVE17099	1.00358	26.5067	0.000504633	203353
NVE17479	1.10804	550.281	1.25699e-07	233740
NVE17639	0.594157	174.123	0.000256902	96736
NVE17674	2.16012	82.6398	9.99667e-18	203669
NVE17724	0.441873	398.075	0.00102446	No data
NVE17870	1.94624	217.204	1.95589e-11	241440
NVE18961	1.25178	452.811	1.66795e-05	238344
NVE19039	1.94322	1198.67	4.77068e-10	238391
NVE19041	1.23728	190.931	1.70615e-06	82364
NVE19319	0.776441	184.156	1.33445e-06	227643
NVE19368	1.36392	283.902	1.42979e-17	241768
NVE19531	0.26103	772.283	0.00628119	99263
NVE19597	1.36668	426.183	2.55075e-14	63846
NVE19674	0.253794	1710.18	0.00797452	233772
NVE20613	0.440442	582.985	4.56977e-06	242167
NVE20743	1.46061	117.491	2.67066e-12	25059
NVE2100	1.98626	786.813	8.21614e-22	85822
NVE21028	0.349791	331.197	0.002372	82804
NVE2203	0.517298	216.095	0.000380704	239183
NVE221	0.455685	291.618	0.00475668	79348
NVE22139	0.788813	83.2237	0.000282526	103228
NVE22150	1.16508	405.836	8.1469e-06	206329
NVE22462	1.69705	1761.21	4.51875e-11	238654
NVE22463	2.33976	2948.53	8.25377e-25	238655
NVE22650	0.522081	214.667	0.00043445	221241
NVE22856	0.539568	782.654	0.000555797	242783
NVE23149	1.90431	35.3591	1.63375e-10	No data
NVE2396	0.820256	174.498	1.60268e-06	188457
NVE240	1.87978	65.6042	3.71816e-15	237825
NVE24640	0.563506	1576.3	1.03808e-06	167234
NVE252	2.73475	259.59	2.7679e-25	237832
NVE25686	0.552272	648.333	0.0025746	108947
NVE25937	2.19939	22.808	5.19663e-07	No data
NVE26025	0.289059	239.797	0.00876645	208816
NVE26057	1.41266	229.468	6.39745e-08	243754
NVE26059	1.29546	759.039	2.26742e-10	110159
NVE2639	0.816952	66.1804	0.000164802	210732
NVE3754	0.740091	347.313	3.60049e-06	24420
NVE3769	0.909228	195.52	1.16602e-05	No data
NVE3842	3.47379	320.83	3.10586e-30	239381
NVE3845	1.68453	2300.09	1.79529e-13	232015
NVE4236	0.344834	763.552	0.000100043	237233
NVE4519	0.659056	340.304	6.68115e-08	245175
NVE4719	0.595172	245.796	0.00271689	87270
NVE4965	6.52694	14.9536	6.06227e-10	118459
NVE54	0.768537	34.3142	0.0014948	32913
NVE5728	2.17496	341.02	5.91571e-13	245503
NVE5729	0.940103	16.9396	0.00409821	No data
NVE5835	1.01778	504.912	7.00487e-08	212909
NVE6063	0.315254	426.907	0.00704675	171134
NVE6557	1.67553	1168.48	3.22182e-15	213382
NVE7481	0.338984	504.111	0.0040038	88731
NVE7535	0.3569	315.736	0.00370587	66221
NVE7679	0.69023	90.3335	0.000201436	122819
NVE8017	1.19238	31.2605	0.000138724	237852
NVE8024	1.27024	252.885	4.10053e-13	33294
NVE8352	0.521256	64.0439	0.00526888	200262
NVE8428	1.0509	34.7591	0.00130309	123507
NVE856	1.63871	135.564	1.35582e-12	244014
NVE89	4.33049	411.633	7.03355e-124	60470
NVE90	3.41712	50.1558	4.31281e-22	No data
NVE900	1.6875	2956.67	2.21075e-09	111441
NVE9376	1.59821	484.823	2.90722e-11	40426
NVE9379	1.46602	68.713	1.00237e-07	125484
NVE9740	1.44438	50.6976	7.59219e-06	No data
