# Supplementary material for: Cnidarian hair cell development illuminates an ancient role for the class IV POU transcription factor in defining mechanoreceptor identity
Source: eLife. 2021 Dec 23;10:e74336. doi: 10.7554/eLife.74336 (PMC8846589; doi:10.7554/eLife.74336)
Supplement: Supplementary file 8. [file elife-74336-supp8.xlsx]

## Sheet: Sheet 1 - GO_enrichment_terms_i
GO_enrichment_terms_in_downregulated_POU_target_genes
Description	GeneRatio	pvalue	p.adjust
negative regulation of ryanodine-sensitive calcium-release channel activity	7/187	1.88503e-07	0.000117628
synaptic transmission	16/187	2.45186e-07	0.000117628
regulation of store-operated calcium channel activity	6/187	3.54302e-07	0.000117628
response to amphetamine	7/187	6.59919e-07	0.000119168
detection of calcium ion	7/187	7.95136e-07	0.000119168
regulation of light-activated channel activity	6/187	8.13013e-07	0.000119168
negative regulation of peptidyl-threonine phosphorylation	6/187	1.04508e-06	0.000119168
metarhodopsin inactivation	6/187	1.04508e-06	0.000119168
muscle contraction	10/187	1.07682e-06	0.000119168
adaptation of rhodopsin mediated signaling	6/187	1.32863e-06	0.000120301
establishment of meiotic spindle orientation	6/187	1.32863e-06	0.000120301
inositol phosphate metabolic process	7/187	1.59144e-06	0.000132089
regulation of high voltage-gated calcium channel activity	6/187	2.08464e-06	0.00013507
regulation of cardiac muscle contraction by regulation of the release of sequestered calcium ion	7/187	2.55436e-06	0.00013507
positive regulation of cyclic-nucleotide phosphodiesterase activity	6/187	2.57663e-06	0.00013507
kinetochore organization	6/187	2.57663e-06	0.00013507
regulation of ovulation	6/187	2.57663e-06	0.00013507
positive regulation of ryanodine-sensitive calcium-release channel activity	6/187	2.57663e-06	0.00013507
regulation of cell communication by electrical coupling involved in cardiac conduction	6/187	2.57663e-06	0.00013507
positive regulation of nitric-oxide synthase activity	6/187	3.15927e-06	0.000157332
positive regulation of protein autophosphorylation	6/187	3.84483e-06	0.000174066
positive regulation of phosphoprotein phosphatase activity	6/187	3.84483e-06	0.000174066
nitric oxide metabolic process	6/187	4.64668e-06	0.000192837
photoreceptor cell axon guidance	6/187	4.64668e-06	0.000192837
potassium ion export	4/187	6.41359e-06	0.000255066
regulation of response to DNA damage stimulus	6/187	6.65834e-06	0.000255066
positive regulation of peptidyl-threonine phosphorylation	6/187	7.90069e-06	0.000291448
potassium ion transport	7/187	8.73905e-06	0.000310861
activation of adenylate cyclase activity	6/187	9.32446e-06	0.000320247
regulation of filopodium assembly	7/187	1.25131e-05	0.000415433
response to corticosterone	6/187	1.48851e-05	0.000478243
muscle cell cellular homeostasis	8/187	1.61238e-05	0.000501853
glycogen catabolic process	6/187	1.72421e-05	0.000505091
positive regulation of NFAT protein import into nucleus	6/187	1.72421e-05	0.000505091
substantia nigra development	8/187	2.48059e-05	0.000705905
activation of phospholipase C activity	6/187	2.9862e-05	0.000803853
regulation of cytokinesis	6/187	2.9862e-05	0.000803853
male courtship behavior	6/187	3.84934e-05	0.00100893
sensory perception of sound	12/187	4.16949e-05	0.00106482
apoptotic cell clearance	6/187	5.50825e-05	0.0013381
positive regulation of DNA binding	6/187	5.50825e-05	0.0013381
regulation of synaptic growth at neuromuscular junction	6/187	6.90052e-05	0.00156203
actin filament-based movement	6/187	6.90052e-05	0.00156203
positive regulation of protein dephosphorylation	6/187	6.90052e-05	0.00156203
potassium ion transmembrane transport	5/187	8.72608e-05	0.00191622
long-term memory	8/187	8.85001e-05	0.00191622
centriole replication	6/187	9.50133e-05	0.00201347
G2/M transition of mitotic cell cycle	11/187	0.000109814	0.00227864
positive regulation of protein serine/threonine kinase activity	6/187	0.000128276	0.00260741
rhabdomere development	6/187	0.000141209	0.00281288
neuron projection guidance	4/187	0.000196695	0.00384135
detection of stimulus	4/187	0.000235598	0.00451261
platelet degranulation	6/187	0.000263313	0.00486092
organ development	13/187	0.000265673	0.00486092
signal transduction	17/187	0.000271494	0.00486092
peroxisome localization	3/187	0.000273305	0.00486092
neuromuscular junction development	7/187	0.000439121	0.00767307
inner ear receptor cell development	4/187	0.000447604	0.00768645
regulation of heart rate	6/187	0.000607734	0.0101541
positive regulation of phagocytosis	5/187	0.000611694	0.0101541
starch metabolic process	3/187	0.000632137	0.0103214
protein heterooligomerization	6/187	0.000795624	0.0123789
Golgi localization	3/187	0.000796547	0.0123789
positive regulation of acrosome reaction	3/187	0.000796547	0.0123789
response to stimulus	13/187	0.000827746	0.0123789
cell surface receptor signaling pathway	9/187	0.000836324	0.0123789
single-multicellular organism process	11/187	0.000837186	0.0123789
spindle assembly involved in mitosis	6/187	0.000848931	0.0123789
chloride transmembrane transport	5/187	0.000867215	0.0123789
action potential	4/187	0.000870006	0.0123789
positive regulation of cellular process	13/187	0.000944835	0.0132543
neurotrophin TRK receptor signaling pathway	9/187	0.00117544	0.0162603
mitochondrion localization	3/187	0.00120126	0.0163898
cochlea development	4/187	0.00136634	0.0183901
single-organism transport	9/187	0.00167458	0.0222384
glucose metabolic process	6/187	0.00172743	0.0226384
response to abiotic stimulus	7/187	0.00177881	0.023009
regulation of apoptotic process	7/187	0.00185979	0.0237481
regulation of ion transmembrane transport	5/187	0.002113	0.0266398
innervation	3/187	0.00234998	0.0292572
learning or memory	5/187	0.00272766	0.0331311
epithelium development	5/187	0.00272766	0.0331311
cellular response to follicle-stimulating hormone stimulus	3/187	0.00311208	0.037345
membrane organization	6/187	0.00316834	0.0375675
