# Supplementary material for: Cnidarian hair cell development illuminates an ancient role for the class IV POU transcription factor in defining mechanoreceptor identity
Source: eLife. 2021 Dec 23;10:e74336. doi: 10.7554/eLife.74336 (PMC8846589; doi:10.7554/eLife.74336)
Supplement: Supplementary file 9. [file elife-74336-supp9.xlsx]

## Sheet: Sheet1
NVE_ID	JGI_ID	fold change in POU4 mutants relative to siblings	mean_counts	pvalue	Pfam.architecture	Hsap.BBH	Dmel.BBH	Uniprot.ID	Uniprot.description	EggNOG.description	EggNOG.ID	ChIP.seq.mark.location
NVE15196	202575	-5.09558	61.8986	6.08424e-30	F5_F8_type_C/F5_F8_type_C/	Coagulation factor VIII	CG34380	A7RV34	Predicted protein	-	-	both
NVE2514	114289	-2.55982	110.305	1.07286e-29	Usp/	-	-	A7SDJ5	Predicted protein	Universal stress protein	ENOG410VWEC	both
NVE735	No data	-2.41772	109.635	6.52878e-32	-	CD59 antigen, complement regulatory protein	-	NVE735	-	-		both
NVE244	No data	-2.35933	256.639	8.46659e-41	-	-	-	NVE244	-	-		both
NVE15020	218539	-1.79696	125.446	1.40527e-22	WSC/PKD/PKD/PKD/PKD/PKD/PKD/	Polycystin 1 isoform 2 variant	Xylosyltransferase oxt	A7SWF8	Predicted protein	PKD	ENOG410VUF3	both
NVE7534	239769	-1.67697	37.605	3.01738e-09	-	-	-	A7RPG2	Predicted protein	-	-	promoter_region
NVE18231	No data	-1.55648	29.0234	7.85737e-07	-	-	-	NVE18231	-	-		both
NVE19361	98897	-1.48673	157.032	5.63199e-14	Neur_chan_LBD/Neur_chan_memb/	Gamma-aminobutyric acid receptor subunit beta-2	Gamma-aminobutyric acid receptor subunit beta-like	A7RZH4	Predicted protein (Fragment)	-	-	both
NVE13075	92483	-1.48022	110.333	6.41807e-15	-	Major facilitator superfamily domain-containing protein 4	-	A7RSZ5	Predicted protein (Fragment)	Major facilitator superfamily domain containing 4	ENOG410V8D9	promoter_region
NVE8232	196642	-1.10202	529.152	2.48572e-13	-	-	-	A7RG05	Predicted protein		ENOG410VNQU	gene_body
NVE12832	No data	-0.969979	57.4481	1.06413e-05	Ion_trans_2/Ion_trans_2/	Potassium channel subfamily K member 3	CG43155	NVE12832	-	-		both
NVE4945	189854	-0.844718	152.955	3.90002e-07	BTB_2/Ion_trans/	Potassium voltage-gated channel subfamily A member 2	Potassium voltage-gated channel protein Shaker	A7SHB6	Predicted protein (Fragment)	potassium voltage-gated channel shaker-related subfamily member	ENOG410V5JH	gene_body
NVE13277	10122	-0.730436	994.19	1.14452e-06	Ion_trans_2/BK_channel_a/	Potassium channel subfamily T member 1	IP14110p	A7SU69	Predicted protein (Fragment)	potassium channel, subfamily T, member	ENOG410V8YS	both
NVE12924	196786	-0.680087	693.815	6.24655e-06	Ion_trans_2/	Potassium voltage-gated channel subfamily F member 1	Potassium voltage-gated channel protein Shab	A7RGD8	Predicted protein	Ligand-gated ion channel	ENOG410VPU5	both
NVE24403	207612	-0.670829	271.172	0.000115403	Ig_2/	cDNA FLJ54289, highly similar to Neural cell adhesion molecule 2	CG34353	A7S6L5	Predicted protein	-	-	both
NVE5442	160849	-0.652558	2215.69	6.61344e-07	PKD_channel/	Polycystin-2	MIP30126p	A7RN85	Predicted protein	Polycystic kidney disease	ENOG410V7NV	both
NVE18816	220271	-0.645025	240.316	1.4419e-05	EF-hand_7/EF-hand_7/	Calmodulin	AT15141p	A7T043	Predicted protein	-	-	both
NVE26093	208887	-0.485473	143.826	0.00148415	Peptidase_M13_N/Peptidase_M13/	Endothelin converting enzyme 1	RE48040p	A7S9L3	Predicted protein	-	-	both
NVE18051	164057	-0.483233	567.478	8.27714e-05	Pkinase/Myosin_head/IQ/IQ/IQ/IQ/IQ/	Myosin-IIIa	FI21215p1	A7RY41	Predicted protein	myosin IIIA	ENOG410V4U2	gene_body
NVE20107	242002	-0.478363	549.547	0.000178417	EF-hand_8/EF-hand_7/	Kv channel interacting protein 3, calsenilin	CG5890	A7S0J9	Predicted protein	Kv channel interacting protein	ENOG410V73Z	gene_body
NVE2456	No data	-0.454651	563.085	0.000778832	-	-	-	NVE2456	-	-		both
NVE6699	21645	-0.438536	470.138	0.000246616	BTB_2/Ion_trans/	Potassium voltage-gated channel subfamily A member 4	Potassium voltage-gated channel protein Shaker	A7SK44	Predicted protein (Fragment)	-	-	both
NVE19357	204447	-0.431688	154.313	0.00109557	Neur_chan_LBD/Neur_chan_memb/	Gamma-aminobutyric acid receptor subunit gamma-3	Gamma-aminobutyric acid receptor subunit beta-like	A7RZG9	Predicted protein	-	-	both
NVE1571	209875	-0.429644	165.156	0.00457158	Ion_trans_2/	Potassium voltage-gated channel subfamily B member 2	Potassium voltage-gated channel protein Shab	A7SBV4	Predicted protein	-	-	both
NVE7792	24063	-0.392171	658.086	0.00121251	KAP_NTPase/	cDNA FLJ61245, highly similar to Homo sapiens kinase D-interacting substance of 220 kDa (KIDINS220), mRNA	SD10882p	A7SLT1	Predicted protein (Fragment)	kinase D-interacting substrate	ENOG410V86U	both
NVE4822	118173	-0.381972	157.08	0.00628946	Neur_chan_LBD/Neur_chan_memb/	Gamma-aminobutyric acid A receptor beta 1 isoform A	Gamma-aminobutyric acid receptor subunit beta-like	A7SH22	Predicted protein (Fragment)	-	-	gene_body
NVE17685	174	-0.381282	1414.32	6.8648e-05	EF-hand_like/PI-PLC-X/PI-PLC-Y/C2/	Phosphoinositide phospholipase C	1-phosphatidylinositol 4,5-bisphosphate phosphodiesterase classes I and II	A7RXP6	Phosphoinositide phospholipase C (EC 3.1.4.11) (Fragment)	phospholipase C	ENOG410V5XZ	gene_body
NVE4682	160716	-0.357453	649.131	0.00438866	BAR/SH3_2/	Endophilin-A3	AT06279p	A7RMW0	Predicted protein	-	-	both
NVE8149	79767	-0.344164	192.324	0.00664925	Frag1/	Transmembrane protein 77	CG4025	A7RFU0	Predicted protein (Fragment)	DNA-damage regulated autophagy modulator 2	ENOG410V835	both
NVE8763	246278	-0.333273	387.912	0.00149135	Sel1/	-	-	A7SMY9	Predicted protein	SEL1	ENOG410VIF1	both
NVE21877	206093	-0.315326	622.851	0.00516372	ANF_receptor/ANF_receptor/7tm_3/	Gamma-aminobutyric acid (GABA) B receptor, 2	Metabotropic GABA-B receptor subtype 2	A7S379	Predicted protein	-	-	gene_body
NVE22292	229336	-0.242706	4888.5	0.00821155	Pyr_redox_3/	Oxidative stress-induced growth inhibitor 1	-	A7S3Z3	Predicted protein	Oxidative stress induced growth inhibitor	ENOG410V72U	gene_body
NVE9312	172604	0.317381	1582.94	0.00454392	Cu2_monooxygen/Cu2_monoox_C/	Peptidyl-glycine alpha-amidating monooxygenase	Peptidylglycine-alpha-hydroxylating monooxygenase	A7SNT2	Predicted protein	peptidyl-glycine alpha-amidating monooxygenase	ENOG410V5PK	both
NVE16780	248060	0.757003	631.784	2.97677e-06	C1_1/	-	GM13116p	A7SY99	Predicted protein		ENOG410W2QQ	both
NVE5471	160868	1.54179	1570.19	1.37758e-19	Pou/Homeobox/	POU domain, class 4, transcription factor 3	POU domain protein	A7RNB5	POU domain protein	POU class 4 homeobox	ENOG410V8HY	both
