# Supplementary material for: Cnidarian hair cell development illuminates an ancient role for the class IV POU transcription factor in defining mechanoreceptor identity
Source: eLife. 2021 Dec 23;10:e74336. doi: 10.7554/eLife.74336 (PMC8846589; doi:10.7554/eLife.74336)
Supplement: Supplementary file 10. [file elife-74336-supp10.xlsx]

## Sheet: Sheet 1 - POU_IV_activated_gene
POU_IV_activated_genes_hair_cells
Description	GeneRatio	pvalue	p.adjust
potassium ion transmembrane transport	3/25	3.02133e-05	0.00749289
nervous system development	4/25	0.000493262	0.0365029
innervation	2/25	0.000585878	0.0365029
sensory perception of sound	4/25	0.000588757	0.0365029
single organism signaling	3/25	0.000822314	0.0407868
negative regulation of ryanodine-sensitive calcium-release channel activity	2/25	0.00150924	0.0623817
detection of calcium ion	2/25	0.00223731	0.0792646
inositol phosphate metabolic process	2/25	0.00271438	0.0841459
potassium ion transport	2/25	0.00440497	0.121381
axon extension	2/25	0.00505296	0.125313
regulation of ion transmembrane transport	2/25	0.00647209	0.131645
peptidyl-serine phosphorylation	2/25	0.00956165	0.131645
synaptic transmission	3/25	0.0097191	0.131645
regulation of response to stimulus	2/25	0.00978693	0.131645
ion transport	2/25	0.0134453	0.131645
muscle contraction	2/25	0.0142383	0.131645
trigeminal nerve development	1/25	0.0179606	0.131645
regulation of cAMP metabolic process	1/25	0.0179606	0.131645
potassium ion export	1/25	0.0179606	0.131645
kidney epithelium development	1/25	0.0179606	0.131645
cardiac muscle cell action potential	1/25	0.0179606	0.131645
regulation of protein secretion	1/25	0.0197395	0.131645
protein homooligomerization	2/25	0.0200238	0.131645
negative regulation of neuron apoptotic process	2/25	0.0212815	0.131645
regulation of receptor internalization	1/25	0.0215153	0.131645
negative regulation of protein catabolic process	1/25	0.0215153	0.131645
positive regulation of myoblast differentiation	1/25	0.0215153	0.131645
peripheral nervous system neuron development	1/25	0.0215153	0.131645
positive regulation of cell cycle arrest	1/25	0.0215153	0.131645
determination of liver left/right asymmetry	1/25	0.0215153	0.131645
regulation of neuron death	1/25	0.0215153	0.131645
regulation of cation channel activity	1/25	0.0215153	0.131645
detection of chemical stimulus involved in sensory perception of sour taste	1/25	0.0232881	0.131645
detection of visible light	1/25	0.0232881	0.131645
regulation of synaptic activity	1/25	0.0232881	0.131645
response to stimulus	3/25	0.0234824	0.131645
ovulation cycle process	1/25	0.0250577	0.131645
insulin-like growth factor receptor signaling pathway	1/25	0.0250577	0.131645
positive regulation of acrosome reaction	1/25	0.0250577	0.131645
cell communication	2/25	0.0252468	0.131645
positive regulation of nitric oxide biosynthetic process	1/25	0.0268243	0.131645
oocyte maturation	1/25	0.0285878	0.131645
heart jogging	1/25	0.0285878	0.131645
central nervous system neuron differentiation	1/25	0.0285878	0.131645
synaptic transmission, GABAergic	1/25	0.0285878	0.131645
cellular response to histamine	1/25	0.0285878	0.131645
JAK-STAT cascade	1/25	0.0303483	0.131645
positive regulation of CREB transcription factor activity	1/25	0.0303483	0.131645
flight behavior	1/25	0.0321057	0.131645
behavioral response to pain	1/25	0.0321057	0.131645
cartilage morphogenesis	1/25	0.0321057	0.131645
embryonic placenta development	1/25	0.0356113	0.131645
toxin metabolic process	1/25	0.0356113	0.131645
habenula development	1/25	0.0356113	0.131645
auditory receptor cell differentiation	1/25	0.0356113	0.131645
release of sequestered calcium ion into cytosol	1/25	0.0356113	0.131645
maternal process involved in female pregnancy	1/25	0.0356113	0.131645
hemostasis	1/25	0.0373595	0.131645
cellular response to reactive oxygen species	1/25	0.0373595	0.131645
cellular response to acidic pH	1/25	0.0373595	0.131645
regulation of circadian sleep/wake cycle, sleep	1/25	0.0391047	0.131645
placenta blood vessel development	1/25	0.0391047	0.131645
neuron projection guidance	1/25	0.0391047	0.131645
regulation of store-operated calcium channel activity	1/25	0.0391047	0.131645
ion transmembrane transport	2/25	0.0408161	0.131645
protein autophosphorylation	2/25	0.0408161	0.131645
cell surface receptor signaling pathway	2/25	0.0424902	0.131645
peptide hormone processing	1/25	0.0425859	0.131645
regulation of neurogenesis	1/25	0.0425859	0.131645
larval locomotory behavior	1/25	0.044322	0.131645
negative regulation of cell communication	1/25	0.044322	0.131645
regulation of light-activated channel activity	1/25	0.044322	0.131645
central nervous system projection neuron axonogenesis	1/25	0.044322	0.131645
regulation of cellular protein metabolic process	1/25	0.044322	0.131645
negative regulation of peptidyl-threonine phosphorylation	1/25	0.046055	0.131645
metarhodopsin inactivation	1/25	0.046055	0.131645
positive regulation of blood vessel endothelial cell migration	1/25	0.046055	0.131645
response to copper ion	1/25	0.046055	0.131645
negative regulation of G1/S transition of mitotic cell cycle	1/25	0.046055	0.131645
neurotrophin TRK receptor signaling pathway	2/25	0.0463506	0.131645
adaptation of rhodopsin mediated signaling	1/25	0.0477851	0.131645
cytoplasmic transport	1/25	0.0477851	0.131645
establishment of meiotic spindle orientation	1/25	0.0477851	0.131645
inner ear receptor cell development	1/25	0.0477851	0.131645
positive regulation of cell adhesion	1/25	0.0495121	0.131645
