# Supplementary material for: Cnidarian hair cell development illuminates an ancient role for the class IV POU transcription factor in defining mechanoreceptor identity
Source: eLife. 2021 Dec 23;10:e74336. doi: 10.7554/eLife.74336 (PMC8846589; doi:10.7554/eLife.74336)
Supplement: Supplementary file 11. [file elife-74336-supp11.xlsx]

## Sheet: Sheet1
gene	JGI_ID	fold_change	mean_counts	pvalue	Pfam.architecture	Hsap.BBH	Dmel.BBH	Uniprot.ID	Uniprot.description	EggNOG.description	EggNOG.ID	ChIP.seq.mark.location
NVE3791	239358	-2.42846	18.8226	5.66995e-07	-	Transmembrane prolyl 4-hydroxylase	Prolyl 4-hydroxylase alpha subunit	A7RME5	Predicted protein	-	-	both
NVE5212	118978	-1.64559	69.212	2.5446e-06	2OG-FeII_Oxy_3/	Transmembrane prolyl 4-hydroxylase	FI13021p	A7SHW1	Predicted protein (Fragment)	-	-	both
NVE20954	238501	-0.915898	38.9523	0.000218282	Serinc/	Serine incorporator 1	TMS1	A7RID6	Predicted protein	Serine incorporator (Serinc)	ENOG410VRX9	both
NVE7535	66221	0.3569	315.736	0.00370587	zf-H2C2_2/zf-C2H2/	PR domain zinc finger protein 13	CG13296	A7RPG3	Predicted protein (Fragment)	PR domain containing 13	ENOG410VCZH	gene_body
NVE12762	131609	0.430018	390.567	0.00457288	HMG_box/	SOX11 protein	Dichaete	A7STW6	Predicted protein (Fragment)	SRY (sex determining region Y)-box 4	ENOG410WGUP	gene_body
NVE21881	232632	0.461999	376.43	0.00116695	HLH/	DNA-binding protein inhibitor ID-4	-	A7S384	Predicted protein (Fragment)	-	-	both
NVE3793	86975	0.63288	76.5422	0.00150219	-	Transmembrane prolyl 4-hydroxylase	RE70601p	A7RME7	Predicted protein (Fragment)	-	-	both
NVE25278	238885	0.813864	167.793	1.22891e-05	EF-hand_5/EF-hand_5/	Transmembrane prolyl 4-hydroxylase	FI08532p	A7RK78	Predicted protein		ENOG410VQH8	both
NVE19866	195205	1.01975	105.499	8.10038e-06	P4Ha_N/2OG-FeII_Oxy/	Prolyl 4-hydroxylase subunit alpha-2	Prolyl 4-hydroxylase alpha-related protein PH4[alpha]EFB	A7T0N3	Predicted protein	Prolyl 4-hydroxylase, alpha polypeptide	ENOG410VA8A	both
NVE2102	239130	1.34699	136.985	2.00838e-10	HMG_box/	Transcription factor SOX-21	GH07353p	Q3S383	Predicted protein (Sox family protein 2)	-	-	both
NVE24152	243139	1.44214	198.822	9.17127e-16	7tm_1/	Melanopsin	Opsin Rh6	A7S651	Predicted protein	7 transmembrane receptor (rhodopsin family)	ENOG410VT1I	both
NVE5471	160868	1.54179	1570.19	1.37758e-19	Pou/Homeobox/	POU domain, class 4, transcription factor 3	POU domain protein	A7RNB5	POU domain protein	POU class 4 homeobox	ENOG410V8HY	both
NVE25277	84193	1.69631	110.36	1.64167e-15	EF-hand_7/	Transmembrane prolyl 4-hydroxylase	IP03859p	A7RK77	Predicted protein (Fragment)	Prolyl 4-hydroxylase, transmembrane (Endoplasmic reticulum)	ENOG410V843	both
NVE16303	81344	1.7931	218.55	1.63114e-17	zf-C2H2_6/zf-H2C2_2/zf-H2C2_2/zf-H2C2_2/zf-H2C2_2/zf-H2C2_2/	Putative zinc finger protein 724	LD26873p	A7RGU6	Predicted protein (Fragment)	Zinc finger protein	ENOG410VJAU	gene_body
NVE2100	85822	1.98626	786.813	8.21614e-22	Thioredoxin_7/	Thioredoxin domain-containing protein 12	-	A7RLG7	Predicted protein	-	-	gene_body
NVE21135	165424	2.23566	68.4635	3.13082e-22	zf-C4/Hormone_recep/	Ovalbumin upstream promoter-transcription factor I	Steroid receptor seven-up	A7S1X5	Predicted protein	-	-	promoter_region
