# Supplementary material for: Cnidarian hair cell development illuminates an ancient role for the class IV POU transcription factor in defining mechanoreceptor identity
Source: eLife. 2021 Dec 23;10:e74336. doi: 10.7554/eLife.74336 (PMC8846589; doi:10.7554/eLife.74336)
Supplement: Supplementary file 12. [file elife-74336-supp12.xlsx]

## Sheet: Sheet 1 - POU_IV_repressed_gene
POU_IV_repressed_genes_cnidocytes
Description	GeneRatio	pvalue	p.adjust
transcription from RNA polymerase II promoter	4/13	0.000218831	0.0282293
positive regulation of osteoblast differentiation	2/13	0.00135772	0.0634172
negative regulation of neuron differentiation	2/13	0.00179904	0.0634172
visual perception	2/13	0.00347604	0.0634172
positive regulation of gliogenesis	1/13	0.00937606	0.0634172
trigeminal nerve development	1/13	0.00937606	0.0634172
ascending aorta morphogenesis	1/13	0.00937606	0.0634172
negative regulation of astrocyte differentiation	1/13	0.00937606	0.0634172
peptidyl-proline hydroxylation to 4-hydroxy-L-proline	1/13	0.0103092	0.0634172
DNA damage response, detection of DNA damage	1/13	0.0103092	0.0634172
eyelid development in camera-type eye	1/13	0.0103092	0.0634172
cornea development in camera-type eye	1/13	0.0103092	0.0634172
negative regulation of transcription regulatory region DNA binding	1/13	0.0103092	0.0634172
peripheral nervous system neuron development	1/13	0.0112415	0.0634172
maternal placenta development	1/13	0.012173	0.0634172
detection of visible light	1/13	0.012173	0.0634172
sympathetic nervous system development	1/13	0.012173	0.0634172
kidney morphogenesis	1/13	0.012173	0.0634172
phototaxis	1/13	0.0131037	0.0634172
embryonic neurocranium morphogenesis	1/13	0.0131037	0.0634172
regulation of neuron migration	1/13	0.0131037	0.0634172
lung morphogenesis	1/13	0.0140336	0.0634172
somite development	1/13	0.0140336	0.0634172
L-amino acid transport	1/13	0.0149627	0.0634172
cerebral cortex neuron differentiation	1/13	0.0149627	0.0634172
central nervous system neuron differentiation	1/13	0.0149627	0.0634172
trophoblast giant cell differentiation	1/13	0.0168184	0.0634172
compound eye photoreceptor fate commitment	1/13	0.0177451	0.0634172
negative regulation of endothelial cell migration	1/13	0.0177451	0.0634172
glial cell development	1/13	0.0177451	0.0634172
habenula development	1/13	0.0186709	0.0634172
auditory receptor cell differentiation	1/13	0.0186709	0.0634172
innervation	1/13	0.0186709	0.0634172
epithelial cell proliferation involved in Malpighian tubule morphogenesis	1/13	0.0186709	0.0634172
T cell differentiation	1/13	0.019596	0.0634172
limb bud formation	1/13	0.019596	0.0634172
neural tube formation	1/13	0.0205202	0.0634172
neuron-neuron synaptic transmission	1/13	0.0205202	0.0634172
negative regulation of glial cell proliferation	1/13	0.0205202	0.0634172
placenta blood vessel development	1/13	0.0205202	0.0634172
cerebral cortex regionalization	1/13	0.0223663	0.0634172
regulation of neurogenesis	1/13	0.0223663	0.0634172
phototransduction	1/13	0.0232881	0.0634172
negative regulation of fat cell differentiation	1/13	0.0232881	0.0634172
negative regulation of oligodendrocyte differentiation	1/13	0.0242091	0.0634172
positive regulation of apoptotic process	2/13	0.0245374	0.0634172
phospholipid metabolic process	1/13	0.0251293	0.0634172
intracellular receptor signaling pathway	1/13	0.0251293	0.0634172
negative regulation of cyclin-dependent protein serine/threonine kinase activity	1/13	0.0251293	0.0634172
embryonic skeletal system morphogenesis	1/13	0.0251293	0.0634172
ventricular septum morphogenesis	1/13	0.0269674	0.0634172
outflow tract morphogenesis	1/13	0.0278852	0.0634172
hypothalamus development	1/13	0.0278852	0.0634172
positive regulation of cell differentiation	1/13	0.0278852	0.0634172
neuron fate specification	1/13	0.0288022	0.0634172
neuron apoptotic process	1/13	0.0288022	0.0634172
melanocyte differentiation	1/13	0.0297184	0.0634172
lymphangiogenesis	1/13	0.0306339	0.0634172
positive regulation of insulin secretion	1/13	0.0315485	0.0634172
enteric nervous system development	1/13	0.0315485	0.0634172
limb development	1/13	0.0315485	0.0634172
spinal cord motor neuron differentiation	1/13	0.0324623	0.0634172
embryonic digestive tract morphogenesis	1/13	0.0324623	0.0634172
single-organism process	2/13	0.0340667	0.0634172
neuroblast proliferation	1/13	0.0342876	0.0634172
negative regulation of neuron projection development	1/13	0.0342876	0.0634172
oligodendrocyte development	1/13	0.0351991	0.0634172
negative regulation of protein ubiquitination	1/13	0.0351991	0.0634172
multicellular organism reproduction	1/13	0.0361097	0.0634172
lens development in camera-type eye	1/13	0.0370196	0.0634172
neural crest cell development	1/13	0.0379286	0.0634172
retinal ganglion cell axon guidance	1/13	0.0379286	0.0634172
methylation	1/13	0.0379286	0.0634172
cell maturation	1/13	0.0379286	0.0634172
oligodendrocyte differentiation	1/13	0.0379286	0.0634172
negative regulation of endothelial cell proliferation	1/13	0.0388369	0.0634172
positive regulation of neuroblast proliferation	1/13	0.0388369	0.0634172
endocrine pancreas development	1/13	0.0388369	0.0634172
fat cell differentiation	1/13	0.0388369	0.0634172
hair follicle development	1/13	0.0397444	0.0640878
negative regulation of cell death	1/13	0.041557	0.0659953
fertilization	1/13	0.0424621	0.0659953
somatic stem cell maintenance	1/13	0.0424621	0.0659953
neural crest cell migration	1/13	0.0451727	0.0685562
developmental growth	1/13	0.0451727	0.0685562
skeletal muscle cell differentiation	1/13	0.0469758	0.0704637
canonical Wnt signaling pathway	1/13	0.0487758	0.0723228
