# Supplementary material for: Cnidarian hair cell development illuminates an ancient role for the class IV POU transcription factor in defining mechanoreceptor identity
Source: eLife. 2021 Dec 23;10:e74336. doi: 10.7554/eLife.74336 (PMC8846589; doi:10.7554/eLife.74336)
Supplement: Supplementary file 13. [file elife-74336-supp13.xlsx]

## Sheet: c63
gene	JGI_ID	fold change in POU4 mutants relative to siblings	mean_counts	pvalue	Pfam.architecture	Hsap.BBH	Dmel.BBH	Uniprot.ID	Uniprot.description	EggNOG.description	EggNOG.ID	ChIP.seq.mark.location
NVE15071	18391	-3.11373	75.8602	6.6466e-23	Ion_trans_2/	Potassium voltage-gated channel subfamily F member 1	Shaker cognate w	NVE15071	-	-		both
NVE2514	114289	-2.55982	110.305	1.07286e-29	Usp/	-	-	A7SDJ5	Predicted protein	Universal stress protein	ENOG410VWEC	both
NVE19980	24362	-1.6503	55.2769	3.12628e-11	FA_desaturase/	Stearoyl-CoA desaturase 5	Fatty acid desaturase	NVE19980	-	-		gene_body
NVE13075	92483	-1.48022	110.333	6.41807e-15	-	Major facilitator superfamily domain-containing protein 4	-	A7RSZ5	Predicted protein (Fragment)	Major facilitator superfamily domain containing 4	ENOG410V8D9	promoter_region
NVE11748	91324	-1.14716	1695.25	1.60577e-07	C2/C2/C2/PRT_C/	Multiple C2 and transmembrane domain-containing protein 1	Multiple C2 domain and transmembrane region protein	A7RS41	Predicted protein (Fragment)	Multiple C2 domains, transmembrane	ENOG410WDIC	both
NVE9425	200525	-0.989887	302.667	1.1692e-07	Tubulin/Tubulin_C/	Tubulin alpha-1A chain	Tubulin alpha-1 chain	A7RQB6	Predicted protein	-	-	gene_body
NVE21139	No data	-0.929102	89.4878	5.87557e-06	-	-	-	NVE21139	-	-		both
NVE13277	10122	-0.730436	994.19	1.14452e-06	Ion_trans_2/BK_channel_a/	Potassium channel subfamily T member 1	IP14110p	A7SU69	Predicted protein (Fragment)	potassium channel, subfamily T, member	ENOG410V8YS	both
NVE7348	45	-0.720997	762.518	1.82425e-07	Ion_trans/Ion_trans/Na_trans_assoc/Ion_trans/	Sodium channel protein type 10 subunit alpha	Sodium channel protein	NVE7348	-	-		gene_body
NVE776	No data	-0.636867	47.0383	0.00268515	-	-	-	NVE776	-	-		both
NVE16297	39805	-0.629518	2150.53	0.00503909	zf-H2C2_2/zf-H2C2_2/	Early growth response 1	Stripe	A7RGT8	Predicted protein (Fragment)	Early growth response 1	ENOG410V606	both
NVE7055	213684	-0.569997	325.392	1.56057e-06	Ion_trans_2/	Potassium voltage-gated channel subfamily G member 2	Shaw-like	A7SKI2	Predicted protein	-	-	both
NVE8332	88970	-0.560383	107.28	0.000967371	EF-hand_7/EF-hand_7/	Calmodulin	AT15141p	A7RPN8	Predicted protein (Fragment)	-	-	both
NVE13074	201686	-0.483765	66.0917	0.00859603	-	Major facilitator superfamily domain-containing protein 4	-	A7RSZ4	Predicted protein	Major facilitator superfamily domain containing 4	ENOG410V8D9	gene_body
NVE14851	No data	-0.442744	58.0644	0.00612092	Usp/	-	-	NVE14851	-	-		both
NVE14933	234521	-0.408721	525.7	0.0099691	Tubulin/Tubulin_C/	Tubulin alpha-1C chain	Tubulin alpha-1 chain	A7RUX0	Predicted protein	-	-	both
NVE4682	160716	-0.357453	649.131	0.00438866	BAR/SH3_2/	Endophilin-A3	AT06279p	A7RMW0	Predicted protein	-	-	both
NVE8763	246278	-0.333273	387.912	0.00149135	Sel1/	-	-	A7SMY9	Predicted protein	SEL1	ENOG410VIF1	both
NVE1109	168568	0.302928	324.812	0.00967377	CMAS/	-	-	A7SB91	Predicted protein	Histone methylation protein DOT1	ENOG410VS21	gene_body
NVE5471	160868	1.54179	1570.19	1.37758e-19	Pou/Homeobox/	POU domain, class 4, transcription factor 3	POU domain protein	A7RNB5	POU domain protein	POU class 4 homeobox	ENOG410V8HY	both

## Sheet: c64
gene	JGI_ID	fold change in POU4 mutants relative to siblings	mean_counts	pvalue	Pfam.architecture	Hsap.BBH	Dmel.BBH	Uniprot.ID	Uniprot.description	EggNOG.description	EggNOG.ID	ChIP.seq.mark.location
NVE19423	No data	-6.79028	47.5071	9.05612e-17	PAN_1/Lectin_C/	Collectin-12	Lectin type C	NVE19423	-	-		both
NVE22714	No data	-4.62874	92.605	6.2607e-41	F5_F8_type_C/	-	-	NVE22714	-	-		both
NVE1494	No data	-4.45306	189.317	5.67124e-44	-	-	-	NVE1494	-	-		both
NVE10252	127428	-4.45017	259.207	2.00005e-51	-	-	-	A7SQC3	Predicted protein (Fragment)	-	-	promoter_region
NVE19371	No data	-4.06783	40.2868	6.59295e-22	Laminin_G_3/Lectin_C/	ACAN protein	-	NVE19371	-	-		both
NVE6265	120436	-3.65205	56.6563	1.00338e-23	Pkinase_Tyr/HNOBA/Guanylate_cyc/	Guanylate cyclase	Guanylate cyclase	A7SJA1	Guanylate cyclase (EC 4.6.1.2) (Fragment)	-	-	gene_body
NVE24622	207789	-3.46057	78.0903	2.46087e-35	-	-	-	A7S6Z1	Predicted protein	-	-	both
NVE6946	64340	-3.00866	2203.45	8.1546e-21	hEGF/EGF/EGF/EGF/	Sushi, von Willebrand factor type A, EGF and pentraxin domain-containing protein 1	Notch	A7RP66	Predicted protein (Fragment)	-	-	both
NVE3410	211237	-2.83379	110.729	7.65162e-37	F5_F8_type_C/	cDNA FLJ75267, highly similar to Homo sapiens neuropilin-2 soluble isoform 9 (NRP2) mRNA	CG34380	A7SEY7	Predicted protein	-	-	both
NVE2081	239118	-2.76293	75.832	3.14455e-18	-	-	-	A7RLF1	Predicted protein	-	-	gene_body
NVE19227	98484	-2.64028	21.5769	2.48546e-11	SEA/	-	-	NVE19227	-	-		gene_body
NVE47	237717	-2.57972	1591.94	3.94361e-60	ATP-grasp_4/	-	-	A7RET6	Predicted protein	-	-	gene_body
NVE2514	114289	-2.55982	110.305	1.07286e-29	Usp/	-	-	A7SDJ5	Predicted protein	Universal stress protein	ENOG410VWEC	both
NVE10898	240186	-2.43141	509.359	7.75268e-36	EF-hand_7/EF-hand_6/EF-hand_6/EF-hand_5/	Calretinin	Calbindin 53E	A7RRJ6	Predicted protein	Calbindin	ENOG410V5VF	gene_body
NVE5598	119340	-2.18307	7.1566	0.000330347	EGF_3/EGF_3/EGF_CA/EGF_CA/EGF_CA/	Fibrillin-2	Dumpy	A7SIA1	Predicted protein (Fragment)	-	-	gene_body
NVE18817	139887	-1.94733	128.158	1.07118e-22	EF-hand_7/EF-hand_7/	Calmodulin	AT15141p	A7T044	Predicted protein (Fragment)	-	-	both
NVE8568	123804	-1.93521	120.585	2.00268e-27	F5_F8_type_C/F5_F8_type_C/	Coagulation factor V	Neurexin-4	A7SMK1	Predicted protein (Fragment)	FA58C	ENOG410WDX1	both
NVE15933	247953	-1.88688	10.5142	0.000132859	EF-hand_7/EF-hand_7/EF-hand_8/EF-hand_7/	Calmodulin	Calmodulin	A7SXI0	Predicted protein	calmodulin	ENOG410V4X2	promoter_region
NVE25496	21107	-1.88131	726.959	2.06207e-35	PKD_channel/	Polycystic kidney disease 2-like 1 variant	MIP30126p	A7S8E5	Predicted protein (Fragment)	-	-	gene_body
NVE9166	246382	-1.85065	232.779	1.29047e-16	F5_F8_type_C/	Coagulation factor VIII	RE18634p	A7SNI3	Predicted protein	-	-	gene_body
NVE1276	No data	-1.57423	241.678	4.46616e-10	-	-	-	NVE1276	-	-		both
NVE18231	No data	-1.55648	29.0234	7.85737e-07	-	-	-	NVE18231	-	-		both
NVE2168	85928	-1.55284	58.051	1.49277e-09	Neur_chan_LBD/Neur_chan_memb/	cDNA FLJ78149, highly similar to Homo sapiens gamma-aminobutyric acid (GABA) A receptor, gamma 1, mRNA	Gamma-aminobutyric acid receptor subunit beta-like	NVE2168	-	-		gene_body
NVE1277	198676	-1.46462	37.4028	2.04127e-08	ParBc/	Sulfiredoxin-1	Sulfiredoxin	A7RL34	Sulfiredoxin (EC 1.8.98.2)	sulfiredoxin 1	ENOG410VHPT	gene_body
NVE426	110350	-1.44739	74.2102	8.09826e-08	HMG_box/	Transcription factor SOX-3	Sox21b	A7S9V3	Predicted protein (Fragment)	HMG (high mobility group) box	ENOG410WGTS	both
NVE11870	129955	-1.32497	119.877	1.62774e-09	-	-	-	A7SSI0	Predicted protein (Fragment)	-	-	both
NVE14954	135045	-1.28117	132.125	2.19026e-08	I-set/Ig_2/	Hemicentin-1	RE24885p	A7SWB1	Predicted protein (Fragment)	neuronal growth regulator 1	ENOG410VB2U	gene_body
NVE22513	83526	-1.27406	86.6218	7.3939e-06	EF-hand_8/EF-hand_6/	Calmodulin	Calmodulin	A7RJ55	Predicted protein (Fragment)	-	-	gene_body
NVE1605	244207	-1.16142	594.994	6.78208e-07	Anoctamin/	Anoctamin-8	Anoctamin	A7SBX8	Anoctamin	Anoctamin	ENOG410V6GT	gene_body
NVE11748	91324	-1.14716	1695.25	1.60577e-07	C2/C2/C2/PRT_C/	Multiple C2 and transmembrane domain-containing protein 1	Multiple C2 domain and transmembrane region protein	A7RS41	Predicted protein (Fragment)	Multiple C2 domains, transmembrane	ENOG410WDIC	both
NVE26153	No data	-1.11944	42.3114	3.21075e-05	-	-	-	NVE26153	-	-		both
NVE12063	130406	-0.912237	73.9607	2.43139e-06	Ion_trans_2/Ion_trans_2/	Potassium channel, subfamily K, member 9	Acid-sensitive two pore domain K+ channel dTASK-7	A7SSX6	Predicted protein (Fragment)	Potassium channel subfamily K member	ENOG410V54X	both
NVE4945	189854	-0.844718	152.955	3.90002e-07	BTB_2/Ion_trans/	Potassium voltage-gated channel subfamily A member 2	Potassium voltage-gated channel protein Shaker	A7SHB6	Predicted protein (Fragment)	potassium voltage-gated channel shaker-related subfamily member	ENOG410V5JH	gene_body
NVE26	237703	-0.741571	471.639	2.70092e-09	GPS/	Latrophilin-1	Calcium-independent receptor for alpha-latrotoxin	A7REQ7	Predicted protein		ENOG410VU4Z	both
NVE13277	10122	-0.730436	994.19	1.14452e-06	Ion_trans_2/BK_channel_a/	Potassium channel subfamily T member 1	IP14110p	A7SU69	Predicted protein (Fragment)	potassium channel, subfamily T, member	ENOG410V8YS	both
NVE15383	136007	-0.708136	37.8599	0.002098	BTB_2/Ion_trans/	Potassium voltage-gated channel subfamily A member 2	Potassium voltage-gated channel protein Shaker	A7SWZ3	Predicted protein (Fragment)	-	-	gene_body
NVE12924	196786	-0.680087	693.815	6.24655e-06	Ion_trans_2/	Potassium voltage-gated channel subfamily F member 1	Potassium voltage-gated channel protein Shab	A7RGD8	Predicted protein	Ligand-gated ion channel	ENOG410VPU5	both
NVE12981	158359	-0.657294	411.922	1.62049e-06	WD40/WD40/WD40/WD40/WD40/WD40/WD40/WD40/	WD repeat-containing protein 86	F-box/WD repeat-containing protein 7	A7RGK1	Predicted protein	WD repeat domain 86	ENOG410WH3C	both
NVE2500	114299	-0.656725	193.4	3.01171e-05	EF-hand_like/PI-PLC-X/PI-PLC-Y/C2/	1-phosphatidylinositol 4,5-bisphosphate phosphodiesterase delta-4	Phosphoinositide phospholipase C	A7SDH9	Phosphoinositide phospholipase C (EC 3.1.4.11) (Fragment)	phospholipase C	ENOG410V5XZ	both
NVE5442	160849	-0.652558	2215.69	6.61344e-07	PKD_channel/	Polycystin-2	MIP30126p	A7RN85	Predicted protein	Polycystic kidney disease	ENOG410V7NV	both
NVE18816	220271	-0.645025	240.316	1.4419e-05	EF-hand_7/EF-hand_7/	Calmodulin	AT15141p	A7T043	Predicted protein	-	-	both
NVE265	No data	-0.644949	312.282	0.000816895	-	-	-	NVE265	-	-		both
NVE5138	118813	-0.595422	490.333	0.000250145	PAS_9/Ion_trans/cNMP_binding/	Potassium voltage-gated channel subfamily H member 5	Ether a go-go	A7SHR1	Predicted protein	Potassium voltage-gated channel, subfamily H (Eag-related), member	ENOG410V44Y	gene_body
NVE4432	189628	-0.48489	1161.64	0.00129143	E1_dh/Transket_pyr/	2-oxoglutarate dehydrogenase, mitochondrial	Neural conserved at 73EF	A7SGK7	Predicted protein	Dehydrogenase	ENOG410V5U3	gene_body
NVE18051	164057	-0.483233	567.478	8.27714e-05	Pkinase/Myosin_head/IQ/IQ/IQ/IQ/IQ/	Myosin-IIIa	FI21215p1	A7RY41	Predicted protein	myosin IIIA	ENOG410V4U2	gene_body
NVE20107	242002	-0.478363	549.547	0.000178417	EF-hand_8/EF-hand_7/	Kv channel interacting protein 3, calsenilin	CG5890	A7S0J9	Predicted protein	Kv channel interacting protein	ENOG410V73Z	gene_body
NVE2456	No data	-0.454651	563.085	0.000778832	-	-	-	NVE2456	-	-		both
NVE6699	21645	-0.438536	470.138	0.000246616	BTB_2/Ion_trans/	Potassium voltage-gated channel subfamily A member 4	Potassium voltage-gated channel protein Shaker	A7SK44	Predicted protein (Fragment)	-	-	both
NVE17685	174	-0.381282	1414.32	6.8648e-05	EF-hand_like/PI-PLC-X/PI-PLC-Y/C2/	Phosphoinositide phospholipase C	1-phosphatidylinositol 4,5-bisphosphate phosphodiesterase classes I and II	A7RXP6	Phosphoinositide phospholipase C (EC 3.1.4.11) (Fragment)	phospholipase C	ENOG410V5XZ	gene_body
NVE14201	234494	-0.370921	22793.3	0.00683026	Actin/	Actin, cytoplasmic 2	Actin 5C	A7RU31	Predicted protein	Actins are highly conserved proteins that are involved in various types of cell motility and are ubiquitously expressed in all eukaryotic cells	ENOG410V4CV	both
NVE10097	126489	-0.352817	609.775	0.0079834	SH3_9/SH3_2/	Peripheral-type benzodiazepine receptor-associated protein 1	RIM-binding protein	A7SPX6	Predicted protein (Fragment)	-	-	gene_body
NVE8763	246278	-0.333273	387.912	0.00149135	Sel1/	-	-	A7SMY9	Predicted protein	SEL1	ENOG410VIF1	both
NVE19	79108	-0.225532	847.959	0.00960353	RRM_1/	HCG2043421	Protein couch potato	A7REQ1	Predicted protein (Fragment)	RNA binding protein with multiple splicing 2	ENOG410VCBR	gene_body
NVE7535	66221	0.3569	315.736	0.00370587	zf-H2C2_2/zf-C2H2/	PR domain zinc finger protein 13	CG13296	A7RPG3	Predicted protein (Fragment)	PR domain containing 13	ENOG410VCZH	gene_body
NVE5471	160868	1.54179	1570.19	1.37758e-19	Pou/Homeobox/	POU domain, class 4, transcription factor 3	POU domain protein	A7RNB5	POU domain protein	POU class 4 homeobox	ENOG410V8HY	both

## Sheet: c65 (Rfamidergic)
gene	JGI_ID	fold change in POU4 mutants relative to siblings	mean_counts	pvalue	Pfam.architecture	Hsap.BBH	Dmel.BBH	Uniprot.ID	Uniprot.description	EggNOG.description	EggNOG.ID	ChIP.seq.mark.location
NVE2514	114289	-2.55982	110.305	1.07286e-29	Usp/	-	-	A7SDJ5	Predicted protein	Universal stress protein	ENOG410VWEC	both
NVE8232	196642	-1.10202	529.152	2.48572e-13	-	-	-	A7RG05	Predicted protein		ENOG410VNQU	gene_body
NVE4945	189854	-0.844718	152.955	3.90002e-07	BTB_2/Ion_trans/	Potassium voltage-gated channel subfamily A member 2	Potassium voltage-gated channel protein Shaker	A7SHB6	Predicted protein (Fragment)	potassium voltage-gated channel shaker-related subfamily member	ENOG410V5JH	gene_body
NVE7348	45	-0.720997	762.518	1.82425e-07	Ion_trans/Ion_trans/Na_trans_assoc/Ion_trans/	Sodium channel protein type 10 subunit alpha	Sodium channel protein	NVE7348	-	-		gene_body
NVE13208	131788	-0.578777	130.82	0.000873772	AbfB/	-	-	NVE13208	-	-		gene_body
NVE8332	88970	-0.560383	107.28	0.000967371	EF-hand_7/EF-hand_7/	Calmodulin	AT15141p	A7RPN8	Predicted protein (Fragment)	-	-	both
NVE20107	242002	-0.478363	549.547	0.000178417	EF-hand_8/EF-hand_7/	Kv channel interacting protein 3, calsenilin	CG5890	A7S0J9	Predicted protein	Kv channel interacting protein	ENOG410V73Z	gene_body
NVE6699	21645	-0.438536	470.138	0.000246616	BTB_2/Ion_trans/	Potassium voltage-gated channel subfamily A member 4	Potassium voltage-gated channel protein Shaker	A7SK44	Predicted protein (Fragment)	-	-	both
NVE14933	234521	-0.408721	525.7	0.0099691	Tubulin/Tubulin_C/	Tubulin alpha-1C chain	Tubulin alpha-1 chain	A7RUX0	Predicted protein	-	-	both
NVE17685	174	-0.381282	1414.32	6.8648e-05	EF-hand_like/PI-PLC-X/PI-PLC-Y/C2/	Phosphoinositide phospholipase C	1-phosphatidylinositol 4,5-bisphosphate phosphodiesterase classes I and II	A7RXP6	Phosphoinositide phospholipase C (EC 3.1.4.11) (Fragment)	phospholipase C	ENOG410V5XZ	gene_body
NVE4682	160716	-0.357453	649.131	0.00438866	BAR/SH3_2/	Endophilin-A3	AT06279p	A7RMW0	Predicted protein	-	-	both
NVE8149	79767	-0.344164	192.324	0.00664925	Frag1/	Transmembrane protein 77	CG4025	A7RFU0	Predicted protein (Fragment)	DNA-damage regulated autophagy modulator 2	ENOG410V835	both
NVE24201	235000	0.532018	730.733	0.00177166	Tubulin/Tubulin_C/	Tubulin alpha-1A chain	Tubulin alpha-1 chain	A7S699	Predicted protein	-	-	both
NVE5471	160868	1.54179	1570.19	1.37758e-19	Pou/Homeobox/	POU domain, class 4, transcription factor 3	POU domain protein	A7RNB5	POU domain protein	POU class 4 homeobox	ENOG410V8HY	both

## Sheet: c66
gene	JGI_ID	fold change in POU4 mutants relative to siblings	mean_counts	pvalue	Pfam.architecture	Hsap.BBH	Dmel.BBH	Uniprot.ID	Uniprot.description	EggNOG.description	EggNOG.ID	ChIP.seq.mark.location
NVE24166	207417	-4.50738	32.5173	2.05954e-18	F5_F8_type_C/	Coagulation factor VIII	Neurexin-4	A7S665	Predicted protein	-	-	both
NVE2514	114289	-2.55982	110.305	1.07286e-29	Usp/	-	-	A7SDJ5	Predicted protein	Universal stress protein	ENOG410VWEC	both
NVE244	No data	-2.35933	256.639	8.46659e-41	-	-	-	NVE244	-	-		both
NVE19361	98897	-1.48673	157.032	5.63199e-14	Neur_chan_LBD/Neur_chan_memb/	Gamma-aminobutyric acid receptor subunit beta-2	Gamma-aminobutyric acid receptor subunit beta-like	A7RZH4	Predicted protein (Fragment)	-	-	both
NVE13075	92483	-1.48022	110.333	6.41807e-15	-	Major facilitator superfamily domain-containing protein 4	-	A7RSZ5	Predicted protein (Fragment)	Major facilitator superfamily domain containing 4	ENOG410V8D9	promoter_region
NVE8353	No data	-1.28484	255.09	1.57004e-17	Ank_2/Ank_2/Ank_2/Ank/Ank_2/Ank_2/Ank/Ank_4/Ank_2/Ank_2/Ank/	Ankyrin-2	Ankyrin 2	NVE8353	-	-		both
NVE10999	216224	-1.21486	109.671	4.99884e-09	Neur_chan_memb/	Acetylcholine receptor subunit beta	Nicotinic acetylcholine receptor alpha 3 subunit	A7SRB4	Predicted protein (Fragment)	-	-	both
NVE8232	196642	-1.10202	529.152	2.48572e-13	-	-	-	A7RG05	Predicted protein		ENOG410VNQU	gene_body
NVE12832	No data	-0.969979	57.4481	1.06413e-05	Ion_trans_2/Ion_trans_2/	Potassium channel subfamily K member 3	CG43155	NVE12832	-	-		both
NVE4945	189854	-0.844718	152.955	3.90002e-07	BTB_2/Ion_trans/	Potassium voltage-gated channel subfamily A member 2	Potassium voltage-gated channel protein Shaker	A7SHB6	Predicted protein (Fragment)	potassium voltage-gated channel shaker-related subfamily member	ENOG410V5JH	gene_body
NVE7348	45	-0.720997	762.518	1.82425e-07	Ion_trans/Ion_trans/Na_trans_assoc/Ion_trans/	Sodium channel protein type 10 subunit alpha	Sodium channel protein	NVE7348	-	-		gene_body
NVE2712	114647	-0.663053	24.7435	0.00318358	-	-	-	A7SDZ1	Predicted protein (Fragment)	-	-	gene_body
NVE5442	160849	-0.652558	2215.69	6.61344e-07	PKD_channel/	Polycystin-2	MIP30126p	A7RN85	Predicted protein	Polycystic kidney disease	ENOG410V7NV	both
NVE776	No data	-0.636867	47.0383	0.00268515	-	-	-	NVE776	-	-		both
NVE8332	88970	-0.560383	107.28	0.000967371	EF-hand_7/EF-hand_7/	Calmodulin	AT15141p	A7RPN8	Predicted protein (Fragment)	-	-	both
NVE15617	247892	-0.546673	337.292	0.000102342	LicD/	Fukutin related protein	-	A7SX58	Predicted protein	-	-	gene_body
NVE13828	247591	-0.503752	126.883	0.000689854	Kazal_2/	Follistatin-related protein 5	-	A7SV42	Predicted protein	Follistatin-like	ENOG410V9XA	both
NVE26093	208887	-0.485473	143.826	0.00148415	Peptidase_M13_N/Peptidase_M13/	Endothelin converting enzyme 1	RE48040p	A7S9L3	Predicted protein	-	-	both
NVE20107	242002	-0.478363	549.547	0.000178417	EF-hand_8/EF-hand_7/	Kv channel interacting protein 3, calsenilin	CG5890	A7S0J9	Predicted protein	Kv channel interacting protein	ENOG410V73Z	gene_body
NVE14851	No data	-0.442744	58.0644	0.00612092	Usp/	-	-	NVE14851	-	-		both
NVE6699	21645	-0.438536	470.138	0.000246616	BTB_2/Ion_trans/	Potassium voltage-gated channel subfamily A member 4	Potassium voltage-gated channel protein Shaker	A7SK44	Predicted protein (Fragment)	-	-	both
NVE14933	234521	-0.408721	525.7	0.0099691	Tubulin/Tubulin_C/	Tubulin alpha-1C chain	Tubulin alpha-1 chain	A7RUX0	Predicted protein	-	-	both
NVE7792	24063	-0.392171	658.086	0.00121251	KAP_NTPase/	cDNA FLJ61245, highly similar to Homo sapiens kinase D-interacting substance of 220 kDa (KIDINS220), mRNA	SD10882p	A7SLT1	Predicted protein (Fragment)	kinase D-interacting substrate	ENOG410V86U	both
NVE4822	118173	-0.381972	157.08	0.00628946	Neur_chan_LBD/Neur_chan_memb/	Gamma-aminobutyric acid A receptor beta 1 isoform A	Gamma-aminobutyric acid receptor subunit beta-like	A7SH22	Predicted protein (Fragment)	-	-	gene_body
NVE17685	174	-0.381282	1414.32	6.8648e-05	EF-hand_like/PI-PLC-X/PI-PLC-Y/C2/	Phosphoinositide phospholipase C	1-phosphatidylinositol 4,5-bisphosphate phosphodiesterase classes I and II	A7RXP6	Phosphoinositide phospholipase C (EC 3.1.4.11) (Fragment)	phospholipase C	ENOG410V5XZ	gene_body
NVE4682	160716	-0.357453	649.131	0.00438866	BAR/SH3_2/	Endophilin-A3	AT06279p	A7RMW0	Predicted protein	-	-	both
NVE8149	79767	-0.344164	192.324	0.00664925	Frag1/	Transmembrane protein 77	CG4025	A7RFU0	Predicted protein (Fragment)	DNA-damage regulated autophagy modulator 2	ENOG410V835	both
NVE24708	243313	-0.311329	443.541	0.00692671	DUF1151/	-	-	A7S743	Predicted protein	-	-	both
NVE14190	202173	-0.2748	511.358	0.00635385	PB1/C1_1/Pkinase/Pkinase_C/	Protein kinase C iota type	Atypical protein kinase C	A7RU22	Protein kinase C (EC 2.7.11.13)	protein kinase c	ENOG410V6FA	gene_body
NVE1109	168568	0.302928	324.812	0.00967377	CMAS/	-	-	A7SB91	Predicted protein	Histone methylation protein DOT1	ENOG410VS21	gene_body
NVE11184	246966	0.423788	644.895	0.000189303	ATP-synt_ab_N/ATP-synt_ab/ATP-synt_ab_C/	V-type proton ATPase catalytic subunit A	MIP16230p	A7SRN1	Predicted protein	ATPase, H transporting, lysosomal 70kDa, V1 subunit A	ENOG410V5MJ	gene_body
NVE24201	235000	0.532018	730.733	0.00177166	Tubulin/Tubulin_C/	Tubulin alpha-1A chain	Tubulin alpha-1 chain	A7S699	Predicted protein	-	-	both
NVE5471	160868	1.54179	1570.19	1.37758e-19	Pou/Homeobox/	POU domain, class 4, transcription factor 3	POU domain protein	A7RNB5	POU domain protein	POU class 4 homeobox	ENOG410V8HY	both

## Sheet: c75
gene	JGI_ID	fold change in POU4 mutants relative to siblings	mean_counts	pvalue	Pfam.architecture	Hsap.BBH	Dmel.BBH	Uniprot.ID	Uniprot.description	EggNOG.description	EggNOG.ID	ChIP.seq.mark.location
NVE24603	No data	-6.28405	14.9717	2.0894e-09	PAN_1/	-	-	NVE24603	-	-		both
NVE19204	204381	-3.66795	22.7561	1.33938e-13	-	Advillin	-	A7RZA9	Predicted protein	-	-	both
NVE24622	207789	-3.46057	78.0903	2.46087e-35	-	-	-	A7S6Z1	Predicted protein	-	-	both
NVE3410	211237	-2.83379	110.729	7.65162e-37	F5_F8_type_C/	cDNA FLJ75267, highly similar to Homo sapiens neuropilin-2 soluble isoform 9 (NRP2) mRNA	CG34380	A7SEY7	Predicted protein	-	-	both
NVE2081	239118	-2.76293	75.832	3.14455e-18	-	-	-	A7RLF1	Predicted protein	-	-	gene_body
NVE2514	114289	-2.55982	110.305	1.07286e-29	Usp/	-	-	A7SDJ5	Predicted protein	Universal stress protein	ENOG410VWEC	both
NVE25496	21107	-1.88131	726.959	2.06207e-35	PKD_channel/	Polycystic kidney disease 2-like 1 variant	MIP30126p	A7S8E5	Predicted protein (Fragment)	-	-	gene_body
NVE9166	246382	-1.85065	232.779	1.29047e-16	F5_F8_type_C/	Coagulation factor VIII	RE18634p	A7SNI3	Predicted protein	-	-	gene_body
NVE7534	239769	-1.67697	37.605	3.01738e-09	-	-	-	A7RPG2	Predicted protein	-	-	promoter_region
NVE13075	92483	-1.48022	110.333	6.41807e-15	-	Major facilitator superfamily domain-containing protein 4	-	A7RSZ5	Predicted protein (Fragment)	Major facilitator superfamily domain containing 4	ENOG410V8D9	promoter_region
NVE9202	214990	-1.45651	223.43	5.15622e-11	Neur_chan_LBD/Neur_chan_memb/	Neuronal acetylcholine receptor subunit alpha-9	Nicotinic acetylcholine receptor alpha6	A7SNK1	Predicted protein	-	-	gene_body
NVE8353	No data	-1.28484	255.09	1.57004e-17	Ank_2/Ank_2/Ank_2/Ank/Ank_2/Ank_2/Ank/Ank_4/Ank_2/Ank_2/Ank/	Ankyrin-2	Ankyrin 2	NVE8353	-	-		both
NVE5346	212623	-1.16358	21.142	0.00110992	hEGF/hEGF/Fibrinogen_C/hEGF/Fibrinogen_C/	Protocadherin Fat 4	Notch	A7SI46	Predicted protein	-	-	gene_body
NVE26	237703	-0.741571	471.639	2.70092e-09	GPS/	Latrophilin-1	Calcium-independent receptor for alpha-latrotoxin	A7REQ7	Predicted protein		ENOG410VU4Z	both
NVE13277	10122	-0.730436	994.19	1.14452e-06	Ion_trans_2/BK_channel_a/	Potassium channel subfamily T member 1	IP14110p	A7SU69	Predicted protein (Fragment)	potassium channel, subfamily T, member	ENOG410V8YS	both
NVE7348	45	-0.720997	762.518	1.82425e-07	Ion_trans/Ion_trans/Na_trans_assoc/Ion_trans/	Sodium channel protein type 10 subunit alpha	Sodium channel protein	NVE7348	-	-		gene_body
NVE12924	196786	-0.680087	693.815	6.24655e-06	Ion_trans_2/	Potassium voltage-gated channel subfamily F member 1	Potassium voltage-gated channel protein Shab	A7RGD8	Predicted protein	Ligand-gated ion channel	ENOG410VPU5	both
NVE5442	160849	-0.652558	2215.69	6.61344e-07	PKD_channel/	Polycystin-2	MIP30126p	A7RN85	Predicted protein	Polycystic kidney disease	ENOG410V7NV	both
NVE13074	201686	-0.483765	66.0917	0.00859603	-	Major facilitator superfamily domain-containing protein 4	-	A7RSZ4	Predicted protein	Major facilitator superfamily domain containing 4	ENOG410V8D9	gene_body
NVE18051	164057	-0.483233	567.478	8.27714e-05	Pkinase/Myosin_head/IQ/IQ/IQ/IQ/IQ/	Myosin-IIIa	FI21215p1	A7RY41	Predicted protein	myosin IIIA	ENOG410V4U2	gene_body
NVE20107	242002	-0.478363	549.547	0.000178417	EF-hand_8/EF-hand_7/	Kv channel interacting protein 3, calsenilin	CG5890	A7S0J9	Predicted protein	Kv channel interacting protein	ENOG410V73Z	gene_body
NVE2456	No data	-0.454651	563.085	0.000778832	-	-	-	NVE2456	-	-		both
NVE6699	21645	-0.438536	470.138	0.000246616	BTB_2/Ion_trans/	Potassium voltage-gated channel subfamily A member 4	Potassium voltage-gated channel protein Shaker	A7SK44	Predicted protein (Fragment)	-	-	both
NVE7617	122656	-0.397309	330.025	0.00121771	Na_Ca_ex/Calx-beta/Calx-beta/Na_Ca_ex/	SLC8A3 protein	Na/Ca exchange protein	A7SLD3	Predicted protein (Fragment)	Solute carrier family 8 sodium calcium exchanger member	ENOG410V989	gene_body
NVE14201	234494	-0.370921	22793.3	0.00683026	Actin/	Actin, cytoplasmic 2	Actin 5C	A7RU31	Predicted protein	Actins are highly conserved proteins that are involved in various types of cell motility and are ubiquitously expressed in all eukaryotic cells	ENOG410V4CV	both
NVE4682	160716	-0.357453	649.131	0.00438866	BAR/SH3_2/	Endophilin-A3	AT06279p	A7RMW0	Predicted protein	-	-	both
NVE8763	246278	-0.333273	387.912	0.00149135	Sel1/	-	-	A7SMY9	Predicted protein	SEL1	ENOG410VIF1	both
NVE19	79108	-0.225532	847.959	0.00960353	RRM_1/	HCG2043421	Protein couch potato	A7REQ1	Predicted protein (Fragment)	RNA binding protein with multiple splicing 2	ENOG410VCBR	gene_body
NVE5471	160868	1.54179	1570.19	1.37758e-19	Pou/Homeobox/	POU domain, class 4, transcription factor 3	POU domain protein	A7RNB5	POU domain protein	POU class 4 homeobox	ENOG410V8HY	both

## Sheet: c76 (Rfamidergic)
gene	JGI_ID	fold change in POU4 mutants relative to siblings	mean_counts	pvalue	Pfam.architecture	Hsap.BBH	Dmel.BBH	Uniprot.ID	Uniprot.description	EggNOG.description	EggNOG.ID	ChIP.seq.mark.location
NVE24603	No data	-6.28405	14.9717	2.0894e-09	PAN_1/	-	-	NVE24603	-	-		both
NVE19204	204381	-3.66795	22.7561	1.33938e-13	-	Advillin	-	A7RZA9	Predicted protein	-	-	both
NVE24622	207789	-3.46057	78.0903	2.46087e-35	-	-	-	A7S6Z1	Predicted protein	-	-	both
NVE633	168297	-3.1094	6.27279	0.000100443	EF-hand_7/	Calmodulin	Calmodulin	NVE633	-	-		gene_body
NVE3410	211237	-2.83379	110.729	7.65162e-37	F5_F8_type_C/	cDNA FLJ75267, highly similar to Homo sapiens neuropilin-2 soluble isoform 9 (NRP2) mRNA	CG34380	A7SEY7	Predicted protein	-	-	both
NVE2081	239118	-2.76293	75.832	3.14455e-18	-	-	-	A7RLF1	Predicted protein	-	-	gene_body
NVE2514	114289	-2.55982	110.305	1.07286e-29	Usp/	-	-	A7SDJ5	Predicted protein	Universal stress protein	ENOG410VWEC	both
NVE244	No data	-2.35933	256.639	8.46659e-41	-	-	-	NVE244	-	-		both
NVE8090	80003	-1.89522	110.658	4.37649e-18	MAM/	cDNA FLJ50065, highly similar to MAM domain-containing protein 2	Scavenger receptor	A7RFN9	Predicted protein (Fragment)	-	-	both
NVE15933	247953	-1.88688	10.5142	0.000132859	EF-hand_7/EF-hand_7/EF-hand_8/EF-hand_7/	Calmodulin	Calmodulin	A7SXI0	Predicted protein	calmodulin	ENOG410V4X2	promoter_region
NVE25496	21107	-1.88131	726.959	2.06207e-35	PKD_channel/	Polycystic kidney disease 2-like 1 variant	MIP30126p	A7S8E5	Predicted protein (Fragment)	-	-	gene_body
NVE9166	246382	-1.85065	232.779	1.29047e-16	F5_F8_type_C/	Coagulation factor VIII	RE18634p	A7SNI3	Predicted protein	-	-	gene_body
NVE19361	98897	-1.48673	157.032	5.63199e-14	Neur_chan_LBD/Neur_chan_memb/	Gamma-aminobutyric acid receptor subunit beta-2	Gamma-aminobutyric acid receptor subunit beta-like	A7RZH4	Predicted protein (Fragment)	-	-	both
NVE9202	214990	-1.45651	223.43	5.15622e-11	Neur_chan_LBD/Neur_chan_memb/	Neuronal acetylcholine receptor subunit alpha-9	Nicotinic acetylcholine receptor alpha6	A7SNK1	Predicted protein	-	-	gene_body
NVE1882	113283	-1.33647	6.81543	0.00250961	F5_F8_type_C/	cDNA FLJ59612, highly similar to Lactadherin	RE18634p	A7SCJ6	Predicted protein (Fragment)	-	-	both
NVE8353	No data	-1.28484	255.09	1.57004e-17	Ank_2/Ank_2/Ank_2/Ank/Ank_2/Ank_2/Ank/Ank_4/Ank_2/Ank_2/Ank/	Ankyrin-2	Ankyrin 2	NVE8353	-	-		both
NVE14954	135045	-1.28117	132.125	2.19026e-08	I-set/Ig_2/	Hemicentin-1	RE24885p	A7SWB1	Predicted protein (Fragment)	neuronal growth regulator 1	ENOG410VB2U	gene_body
NVE12832	No data	-0.969979	57.4481	1.06413e-05	Ion_trans_2/Ion_trans_2/	Potassium channel subfamily K member 3	CG43155	NVE12832	-	-		both
NVE4945	189854	-0.844718	152.955	3.90002e-07	BTB_2/Ion_trans/	Potassium voltage-gated channel subfamily A member 2	Potassium voltage-gated channel protein Shaker	A7SHB6	Predicted protein (Fragment)	potassium voltage-gated channel shaker-related subfamily member	ENOG410V5JH	gene_body
NVE26	237703	-0.741571	471.639	2.70092e-09	GPS/	Latrophilin-1	Calcium-independent receptor for alpha-latrotoxin	A7REQ7	Predicted protein		ENOG410VU4Z	both
NVE13277	10122	-0.730436	994.19	1.14452e-06	Ion_trans_2/BK_channel_a/	Potassium channel subfamily T member 1	IP14110p	A7SU69	Predicted protein (Fragment)	potassium channel, subfamily T, member	ENOG410V8YS	both
NVE7348	45	-0.720997	762.518	1.82425e-07	Ion_trans/Ion_trans/Na_trans_assoc/Ion_trans/	Sodium channel protein type 10 subunit alpha	Sodium channel protein	NVE7348	-	-		gene_body
NVE12924	196786	-0.680087	693.815	6.24655e-06	Ion_trans_2/	Potassium voltage-gated channel subfamily F member 1	Potassium voltage-gated channel protein Shab	A7RGD8	Predicted protein	Ligand-gated ion channel	ENOG410VPU5	both
NVE24403	207612	-0.670829	271.172	0.000115403	Ig_2/	cDNA FLJ54289, highly similar to Neural cell adhesion molecule 2	CG34353	A7S6L5	Predicted protein	-	-	both
NVE12981	158359	-0.657294	411.922	1.62049e-06	WD40/WD40/WD40/WD40/WD40/WD40/WD40/WD40/	WD repeat-containing protein 86	F-box/WD repeat-containing protein 7	A7RGK1	Predicted protein	WD repeat domain 86	ENOG410WH3C	both
NVE5442	160849	-0.652558	2215.69	6.61344e-07	PKD_channel/	Polycystin-2	MIP30126p	A7RN85	Predicted protein	Polycystic kidney disease	ENOG410V7NV	both
NVE18816	220271	-0.645025	240.316	1.4419e-05	EF-hand_7/EF-hand_7/	Calmodulin	AT15141p	A7T043	Predicted protein	-	-	both
NVE7055	213684	-0.569997	325.392	1.56057e-06	Ion_trans_2/	Potassium voltage-gated channel subfamily G member 2	Shaw-like	A7SKI2	Predicted protein	-	-	both
NVE12748	174288	-0.511134	178.29	0.00282991	zf-C3HC4/zf-TRAF/MATH/	TNF receptor-associated factor 4	TRAF1	A7STV3	Predicted protein	TNF receptor-associated factor	ENOG410V64Q	both
NVE26093	208887	-0.485473	143.826	0.00148415	Peptidase_M13_N/Peptidase_M13/	Endothelin converting enzyme 1	RE48040p	A7S9L3	Predicted protein	-	-	both
NVE13074	201686	-0.483765	66.0917	0.00859603	-	Major facilitator superfamily domain-containing protein 4	-	A7RSZ4	Predicted protein	Major facilitator superfamily domain containing 4	ENOG410V8D9	gene_body
NVE18051	164057	-0.483233	567.478	8.27714e-05	Pkinase/Myosin_head/IQ/IQ/IQ/IQ/IQ/	Myosin-IIIa	FI21215p1	A7RY41	Predicted protein	myosin IIIA	ENOG410V4U2	gene_body
NVE20107	242002	-0.478363	549.547	0.000178417	EF-hand_8/EF-hand_7/	Kv channel interacting protein 3, calsenilin	CG5890	A7S0J9	Predicted protein	Kv channel interacting protein	ENOG410V73Z	gene_body
NVE6699	21645	-0.438536	470.138	0.000246616	BTB_2/Ion_trans/	Potassium voltage-gated channel subfamily A member 4	Potassium voltage-gated channel protein Shaker	A7SK44	Predicted protein (Fragment)	-	-	both
NVE1571	209875	-0.429644	165.156	0.00457158	Ion_trans_2/	Potassium voltage-gated channel subfamily B member 2	Potassium voltage-gated channel protein Shab	A7SBV4	Predicted protein	-	-	both
NVE26201	243823	-0.427578	179.441	0.00179253	SHIPPO-rpt/SHIPPO-rpt/SHIPPO-rpt/SHIPPO-rpt/SHIPPO-rpt/SHIPPO-rpt/	Outer dense fiber protein 3	AT18965p	A7S9T2	Predicted protein	outer dense fiber of sperm tails	ENOG410VBPT	gene_body
NVE14933	234521	-0.408721	525.7	0.0099691	Tubulin/Tubulin_C/	Tubulin alpha-1C chain	Tubulin alpha-1 chain	A7RUX0	Predicted protein	-	-	both
NVE17685	174	-0.381282	1414.32	6.8648e-05	EF-hand_like/PI-PLC-X/PI-PLC-Y/C2/	Phosphoinositide phospholipase C	1-phosphatidylinositol 4,5-bisphosphate phosphodiesterase classes I and II	A7RXP6	Phosphoinositide phospholipase C (EC 3.1.4.11) (Fragment)	phospholipase C	ENOG410V5XZ	gene_body
NVE14201	234494	-0.370921	22793.3	0.00683026	Actin/	Actin, cytoplasmic 2	Actin 5C	A7RU31	Predicted protein	Actins are highly conserved proteins that are involved in various types of cell motility and are ubiquitously expressed in all eukaryotic cells	ENOG410V4CV	both
NVE4682	160716	-0.357453	649.131	0.00438866	BAR/SH3_2/	Endophilin-A3	AT06279p	A7RMW0	Predicted protein	-	-	both
NVE8149	79767	-0.344164	192.324	0.00664925	Frag1/	Transmembrane protein 77	CG4025	A7RFU0	Predicted protein (Fragment)	DNA-damage regulated autophagy modulator 2	ENOG410V835	both
NVE8763	246278	-0.333273	387.912	0.00149135	Sel1/	-	-	A7SMY9	Predicted protein	SEL1	ENOG410VIF1	both
NVE19	79108	-0.225532	847.959	0.00960353	RRM_1/	HCG2043421	Protein couch potato	A7REQ1	Predicted protein (Fragment)	RNA binding protein with multiple splicing 2	ENOG410VCBR	gene_body
NVE5471	160868	1.54179	1570.19	1.37758e-19	Pou/Homeobox/	POU domain, class 4, transcription factor 3	POU domain protein	A7RNB5	POU domain protein	POU class 4 homeobox	ENOG410V8HY	both

## Sheet: c100 (spirocyte)
gene	JGI_ID	fold change in POU4 mutants relative to siblings	mean_counts	pvalue	Pfam.architecture	Hsap.BBH	Dmel.BBH	Uniprot.ID	Uniprot.description	EggNOG.description	EggNOG.ID	ChIP.seq.mark.location
NVE16015	247995	-3.52998	109.384	1.10254e-07	-	-	-	A7SXQ0	Predicted protein		ENOG410VWGI	both
NVE11003	No data	-3.3384	15.5315	2.01519e-08	-	-	-	NVE11003	-	-		both
NVE639	235182	-3.04105	6.45666	0.000119861	Alpha_L_fucos/	Tissue alpha-L-fucosidase	Putative alpha-L-fucosidase	A7SAB9	Predicted protein	-	-	gene_body
NVE18950	No data	-2.0534	8.50876	0.000139781	-	-	-	NVE18950	-	-		both
NVE18953	No data	-1.82751	107.401	2.0256e-08	-	-	-	NVE18953	-	-		both
NVE2194	160201	-1.28881	174.962	7.03378e-07	zf-C3HC4/zf-B_box/Filamin/NHL/NHL/NHL/NHL/NHL/NHL/	Tripartite motif-containing protein 2	Thin	A7RLP9	Predicted protein	-	-	both
NVE9332	215113	-0.650145	143.093	0.00130475	Pro_isomerase/	Peptidyl-prolyl cis-trans isomerase B	Peptidyl-prolyl cis-trans isomerase	A7SNV6	Peptidyl-prolyl cis-trans isomerase (EC 5.2.1.8)	-	-	both
NVE25219	60642	-0.633396	220.424	0.00415687	F5_F8_type_C/F5_F8_type_C/F5_F8_type_C/F5_F8_type_C/	EGF-like repeat and discoidin I-like domain-containing protein 3	Hemolectin	A7RK17	Predicted protein (Fragment)	Milk fat globule-EGF factor 8 protein	ENOG410V92H	gene_body
NVE2179	198924	-0.494285	191.121	0.00224862	F5_F8_type_C/Lectin_C/Lectin_C/	Brevican isoform 1 variant	-	A7RLP1	Predicted protein	Lectin C-type domain	ENOG410VTQ7	both
NVE7346	122234	0.395704	3361.66	1.28241e-05	Alpha-amylase/	cDNA FLJ34613 fis, clone KIDNE2014184, highly similar to Neutral and basic amino acid transport protein rBAT	CG14935-PA	A7SL23	Predicted protein (Fragment)	-	-	both
NVE221	79348	0.455685	291.618	0.00475668	EF-hand_7/EF-hand_5/EF-hand_5/EF-hand_7/	CALU protein	Supercoiling factor variant A	A7RFA2	Predicted protein (Fragment)	-	-	gene_body
NVE24201	235000	0.532018	730.733	0.00177166	Tubulin/Tubulin_C/	Tubulin alpha-1A chain	Tubulin alpha-1 chain	A7S699	Predicted protein	-	-	both
NVE18135	No data	0.661012	54.9378	0.00143446	-	-	-	NVE18135	-	-		both
NVE16448	81540	0.713613	403.237	0.000145872	Sulfatase/	Arylsulfatase I	CG8646	A7RH74	Predicted protein (Fragment)	Arylsulfatase	ENOG410V61R	both
NVE16780	248060	0.757003	631.784	2.97677e-06	C1_1/	-	GM13116p	A7SY99	Predicted protein		ENOG410W2QQ	both
NVE22139	103228	0.788813	83.2237	0.000282526	-	-	-	A7S3P5	Predicted protein (Fragment)	-	-	gene_body
NVE25278	238885	0.813864	167.793	1.22891e-05	EF-hand_5/EF-hand_5/	Transmembrane prolyl 4-hydroxylase	FI08532p	A7RK78	Predicted protein		ENOG410VQH8	both
NVE9976	No data	0.861049	521.396	2.42093e-06	Collagen/	-	-	NVE9976	-	-		both
NVE10637	246830	0.919237	287.465	5.38938e-07	Dynamin_N/	Dysbindin	Dysbindin ortholog	A7SQU9	Predicted protein		ENOG410W2WU	gene_body
NVE5835	212909	1.01778	504.912	7.00487e-08	DUF1981/	KIAA1244	CG5937	A7SIS0	Predicted protein	Brefeldin A-inhibited guanine nucleotide-exchange protein	ENOG410V4BC	gene_body
NVE10640	13724	1.01801	57.2153	1.28297e-05	Metallophos/	Acid phosphatase 5, tartrate resistant	-	A7SQV0	Predicted protein (Fragment)	Calcineurin-like phosphoesterase	ENOG410VQXF	gene_body
NVE19866	195205	1.01975	105.499	8.10038e-06	P4Ha_N/2OG-FeII_Oxy/	Prolyl 4-hydroxylase subunit alpha-2	Prolyl 4-hydroxylase alpha-related protein PH4[alpha]EFB	A7T0N3	Predicted protein	Prolyl 4-hydroxylase, alpha polypeptide	ENOG410VA8A	both
NVE17479	233740	1.10804	550.281	1.25699e-07	-	-	-	A7SYZ5	Predicted protein	-	-	gene_body
NVE20437	205168	1.1138	419.836	8.71491e-08	F5_F8_type_C/	cDNA FLJ61618, highly similar to Discoidin, CUB and LCCL domain-containing protein 2	Neurexin-4	A7S127	Predicted protein	FA58C	ENOG410WFP9	both
NVE22150	206329	1.16508	405.836	8.1469e-06	Laminin_G_3/EGF/WSC/PLAT/	WSC domain-containing protein 2	Xylosyltransferase oxt	A7S3Q5	Predicted protein	Inherit from KOG: G- protein-coupled receptor	ENOG410VZI3	gene_body
NVE16204	219239	1.18916	58.5976	2.09744e-05	-	-	-	A7SXW4	Predicted protein		ENOG410VYE9	both
NVE8017	237852	1.19238	31.2605	0.000138724	-	-	-	A7RFH0	Predicted protein	-	-	gene_body
NVE19041	82364	1.23728	190.931	1.70615e-06	Gal_Lectin/	Polycystic kidney disease protein 1-like 2	Calcium-independent receptor for alpha-latrotoxin	A7RHX1	Predicted protein (Fragment)	-	-	gene_body
NVE10008	215519	1.24304	115.419	1.30618e-06	zf-C3HC4/zf-B_box/zf-B_box/Filamin/NHL/NHL/NHL/NHL/NHL/	E3 ubiquitin-protein ligase TRIM71	Thin	A7SPQ3	Predicted protein	NHL repeat	ENOG410WJ1U	gene_body
NVE19597	63846	1.36668	426.183	2.55075e-14	GSHPx/	Glutathione peroxidase	Glutathione peroxidase	NVE19597	-	-		gene_body
NVE18954	39131	1.37049	1714.39	5.33391e-09	-	-	-	NVE18954	-	-		both
NVE22736	166263	1.37256	338.472	5.80877e-16	SPRY/SOCS_box/	SplA/ryanodine receptor domain and SOCS box containing 1	Gustavus	A7S4A9	Predicted protein	splA ryanodine receptor domain and SOCS box containing	ENOG410V6W6	both
NVE7303	245957	1.4086	80.5474	1.87058e-08	CAP/	Golgi-associated plant pathogenesis-related protein 1	CG16995	A7SL03	Predicted protein	-	-	both
NVE26057	243754	1.41266	229.468	6.39745e-08	ShK/ShK/VWC/fn2/	-	-	A7S9H4	Predicted protein	-	-	gene_body
NVE19037	238391	1.43312	609.743	1.17734e-08	-	-	-	A7RHW9	Predicted protein	-	-	both
NVE19037	238391	1.43312	609.743	1.17734e-08	-	-	-	A7RHW9	Predicted protein	-	-	both
NVE24152	243139	1.44214	198.822	9.17127e-16	7tm_1/	Melanopsin	Opsin Rh6	A7S651	Predicted protein	7 transmembrane receptor (rhodopsin family)	ENOG410VT1I	both
NVE12607	No data	1.45196	122.062	8.59021e-10	-	-	-	NVE12607	-	-		both
NVE11004	246912	1.47871	96.8483	1.59115e-06	-	-	-	A7SRB8	Predicted protein		ENOG410VSVC	gene_body
NVE25285	238889	1.4924	73.5795	7.21699e-08	Laminin_G_3/	-	-	A7RK85	Predicted protein	-	-	both
NVE5471	160868	1.54179	1570.19	1.37758e-19	Pou/Homeobox/	POU domain, class 4, transcription factor 3	POU domain protein	A7RNB5	POU domain protein	POU class 4 homeobox	ENOG410V8HY	both
NVE3844	232014	1.63125	2217.96	3.40766e-14	Collagen/Collagen/Gal_Lectin/	cDNA FLJ56989, highly similar to Macrophage receptor MARCO	CG42342	A7RMJ6	Predicted protein	Galactose binding lectin domain	ENOG410VS2B	both
NVE3845	232015	1.68453	2300.09	1.79529e-13	Collagen/Collagen/Gal_Lectin/	Collagen alpha-4(IV) chain	Multiplexin	A7RMJ7	Predicted protein	Galactose binding lectin domain	ENOG410VRV3	gene_body
NVE25277	84193	1.69631	110.36	1.64167e-15	EF-hand_7/	Transmembrane prolyl 4-hydroxylase	IP03859p	A7RK77	Predicted protein (Fragment)	Prolyl 4-hydroxylase, transmembrane (Endoplasmic reticulum)	ENOG410V843	both
NVE22154	No data	1.70002	519.648	3.16965e-09	ShK/	-	-	NVE22154	-	-		both
NVE16303	81344	1.7931	218.55	1.63114e-17	zf-C2H2_6/zf-H2C2_2/zf-H2C2_2/zf-H2C2_2/zf-H2C2_2/zf-H2C2_2/	Putative zinc finger protein 724	LD26873p	A7RGU6	Predicted protein (Fragment)	Zinc finger protein	ENOG410VJAU	gene_body
NVE9231	72011	1.82905	493.164	6.17464e-25	GON/	-	-	NVE9231	-	-		both
NVE1559	112522	1.85269	279.593	5.41757e-17	Peptidase_S8/P_proprotein/	Proprotein convertase subtilisin/kexin type 1	Furin 1	A7SBU1	Predicted protein (Fragment)	Proprotein convertase P-domain	ENOG410VR9U	both
NVE11707	240295	1.88845	241.209	1.54416e-16	WAP/	-	-	A7RS00	Predicted protein	WAP	ENOG410VWN5	gene_body
NVE16877	241205	1.93581	116.054	8.0206e-15	-	-	-	A7RWP2	Predicted protein	-	-	both
NVE19039	238391	1.94322	1198.67	4.77068e-10	-	-	-	A7RHW9	Predicted protein	-	-	both
NVE19039	238391	1.94322	1198.67	4.77068e-10	-	-	-	A7RHW9	Predicted protein	-	-	both
NVE17870	241440	1.94624	217.204	1.95589e-11	-	-	-	A7RXW2	Predicted protein	-	-	gene_body
NVE2100	85822	1.98626	786.813	8.21614e-22	Thioredoxin_7/	Thioredoxin domain-containing protein 12	-	A7RLG7	Predicted protein	-	-	gene_body
NVE3643	No data	2.46933	703.622	1.75911e-29	-	-	-	NVE3643	-	-		both
NVE15733	136624	2.52118	654.103	2.85825e-25	-	-	-	A7SXD6	Predicted protein (Fragment)	-	-	both

## Sheet: c101 (nematocyte)
gene	JGI_ID	fold change in POU4 mutants relative to siblings	mean_counts	pvalue	Pfam.architecture	Hsap.BBH	Dmel.BBH	Uniprot.ID	Uniprot.description	EggNOG.description	EggNOG.ID	ChIP.seq.mark.location
NVE16015	247995	-3.52998	109.384	1.10254e-07	-	-	-	A7SXQ0	Predicted protein		ENOG410VWGI	both
NVE13105	240477	-3.10735	63.9082	1.65264e-25	CAP/	Chromosome 9 open reading frame 19	CG31482	A7RT35	Predicted protein	-	-	both
NVE20065	140859	-2.84194	100.598	7.96713e-17	Pentaxin/	Sushi, von Willebrand factor type A, EGF and pentraxin domain-containing protein 1	-	A7T0V7	Predicted protein	-	-	both
NVE3791	239358	-2.42846	18.8226	5.66995e-07	-	Transmembrane prolyl 4-hydroxylase	Prolyl 4-hydroxylase alpha subunit	A7RME5	Predicted protein	-	-	both
NVE12020	130363	-2.09372	30.4519	3.05663e-06	EGF/EGF/EGF/EGF/EGF/EGF/EGF/EGF/EGF/EGF/	Neurogenic locus notch homolog protein 2	Notch	A7SSU4	Predicted protein (Fragment)	EGF-like domain	ENOG410WHGE	both
NVE7532	88765	-2.01714	47.3414	6.47652e-09	-	Repetin	Collagen type IV alpha 2	A7RPF9	Predicted protein (Fragment)	Inherit from COG: Catalyzes the N-acylation of UDP-3-O-acylglucosamine using 3-hydroxyacyl-ACP as the acyl donor. Is involved in the biosynthesis of lipid A, a phosphorylated glycolipid that anchors the lipopolysaccharide to the outer membrane of the cell (By similarity)	ENOG410W3W1	both
NVE18953	No data	-1.82751	107.401	2.0256e-08	-	-	-	NVE18953	-	-		both
NVE5212	118978	-1.64559	69.212	2.5446e-06	2OG-FeII_Oxy_3/	Transmembrane prolyl 4-hydroxylase	FI13021p	A7SHW1	Predicted protein (Fragment)	-	-	both
NVE2194	160201	-1.28881	174.962	7.03378e-07	zf-C3HC4/zf-B_box/Filamin/NHL/NHL/NHL/NHL/NHL/NHL/	Tripartite motif-containing protein 2	Thin	A7RLP9	Predicted protein	-	-	both
NVE4226	No data	-0.80547	113.283	0.000557285	Collagen/	-	-	NVE4226	-	-		both
NVE22155	206332	-0.665021	17.9802	0.0061159	-	-	-	A7S3Q7	Predicted protein	-	-	both
NVE9332	215113	-0.650145	143.093	0.00130475	Pro_isomerase/	Peptidyl-prolyl cis-trans isomerase B	Peptidyl-prolyl cis-trans isomerase	A7SNV6	Peptidyl-prolyl cis-trans isomerase (EC 5.2.1.8)	-	-	both
NVE2179	198924	-0.494285	191.121	0.00224862	F5_F8_type_C/Lectin_C/Lectin_C/	Brevican isoform 1 variant	-	A7RLP1	Predicted protein	Lectin C-type domain	ENOG410VTQ7	both
NVE25773	243657	-0.437953	140.437	0.00413213	-	-	-	A7S8Y1	Predicted protein	-	-	both
NVE8352	200262	0.521256	64.0439	0.00526888	VWA/VWA/VWA/	Vitrin	-	A7RPQ5	Predicted protein	collagen, type VI, alpha	ENOG410V9AJ	both
NVE16448	81540	0.713613	403.237	0.000145872	Sulfatase/	Arylsulfatase I	CG8646	A7RH74	Predicted protein (Fragment)	Arylsulfatase	ENOG410V61R	both
NVE17660	241383	0.721395	289.569	0.00156596	-	-	-	A7RXM0	Predicted protein	-	-	both
NVE531	52570	0.777494	793.794	0.000774922	-	Glutamine-rich protein 2	-	A7SA40	Predicted protein (Fragment)	-	-	both
NVE22139	103228	0.788813	83.2237	0.000282526	-	-	-	A7S3P5	Predicted protein (Fragment)	-	-	gene_body
NVE25278	238885	0.813864	167.793	1.22891e-05	EF-hand_5/EF-hand_5/	Transmembrane prolyl 4-hydroxylase	FI08532p	A7RK78	Predicted protein		ENOG410VQH8	both
NVE2639	210732	0.816952	66.1804	0.000164802	CBM_14/	-	Lethal (3) persistent salivary gland 2	A7SDU4	Predicted protein	-	-	gene_body
NVE9976	No data	0.861049	521.396	2.42093e-06	Collagen/	-	-	NVE9976	-	-		both
NVE3769	No data	0.909228	195.52	1.16602e-05	-	-	-	NVE3769	-	-		both
NVE10637	246830	0.919237	287.465	5.38938e-07	Dynamin_N/	Dysbindin	Dysbindin ortholog	A7SQU9	Predicted protein		ENOG410W2WU	gene_body
NVE5729	No data	0.940103	16.9396	0.00409821	-	-	-	NVE5729	-	-		both
NVE5835	212909	1.01778	504.912	7.00487e-08	DUF1981/	KIAA1244	CG5937	A7SIS0	Predicted protein	Brefeldin A-inhibited guanine nucleotide-exchange protein	ENOG410V4BC	gene_body
NVE10640	13724	1.01801	57.2153	1.28297e-05	Metallophos/	Acid phosphatase 5, tartrate resistant	-	A7SQV0	Predicted protein (Fragment)	Calcineurin-like phosphoesterase	ENOG410VQXF	gene_body
NVE17479	233740	1.10804	550.281	1.25699e-07	-	-	-	A7SYZ5	Predicted protein	-	-	gene_body
NVE20437	205168	1.1138	419.836	8.71491e-08	F5_F8_type_C/	cDNA FLJ61618, highly similar to Discoidin, CUB and LCCL domain-containing protein 2	Neurexin-4	A7S127	Predicted protein	FA58C	ENOG410WFP9	both
NVE22150	206329	1.16508	405.836	8.1469e-06	Laminin_G_3/EGF/WSC/PLAT/	WSC domain-containing protein 2	Xylosyltransferase oxt	A7S3Q5	Predicted protein	Inherit from KOG: G- protein-coupled receptor	ENOG410VZI3	gene_body
NVE16204	219239	1.18916	58.5976	2.09744e-05	-	-	-	A7SXW4	Predicted protein		ENOG410VYE9	both
NVE18974	No data	1.21371	182.21	1.8994e-07	-	-	-	NVE18974	-	-		both
NVE19041	82364	1.23728	190.931	1.70615e-06	Gal_Lectin/	Polycystic kidney disease protein 1-like 2	Calcium-independent receptor for alpha-latrotoxin	A7RHX1	Predicted protein (Fragment)	-	-	gene_body
NVE17415	No data	1.31728	81.923	1.07774e-05	-	-	-	NVE17415	-	-		both
NVE8351	200262	1.3623	149.503	1.8932e-08	VWA/VWA/VWA/	Vitrin	-	A7RPQ5	Predicted protein	collagen, type VI, alpha	ENOG410V9AJ	both
NVE19368	241768	1.36392	283.902	1.42979e-17	-	-	LD16414p	A7RZI1	Predicted protein	-	-	gene_body
NVE19597	63846	1.36668	426.183	2.55075e-14	GSHPx/	Glutathione peroxidase	Glutathione peroxidase	NVE19597	-	-		gene_body
NVE18954	39131	1.37049	1714.39	5.33391e-09	-	-	-	NVE18954	-	-		both
NVE11985	247194	1.37415	454.013	6.66132e-07	ShK/ShK/	-	-	A7SSR7	Predicted protein	-	-	both
NVE26057	243754	1.41266	229.468	6.39745e-08	ShK/ShK/VWC/fn2/	-	-	A7S9H4	Predicted protein	-	-	gene_body
NVE19037	238391	1.43312	609.743	1.17734e-08	-	-	-	A7RHW9	Predicted protein	-	-	both
NVE19037	238391	1.43312	609.743	1.17734e-08	-	-	-	A7RHW9	Predicted protein	-	-	both
NVE24152	243139	1.44214	198.822	9.17127e-16	7tm_1/	Melanopsin	Opsin Rh6	A7S651	Predicted protein	7 transmembrane receptor (rhodopsin family)	ENOG410VT1I	both
NVE12607	No data	1.45196	122.062	8.59021e-10	-	-	-	NVE12607	-	-		both
NVE9379	125484	1.46602	68.713	1.00237e-07	EGF/EGF/EGF/	Soluble protein Jagged	Cadherin-related tumor suppressor	A7SNY9	Predicted protein (Fragment)	-	-	gene_body
NVE11004	246912	1.47871	96.8483	1.59115e-06	-	-	-	A7SRB8	Predicted protein		ENOG410VSVC	gene_body
NVE11984	247194	1.49311	801.62	6.37618e-07	ShK/ShK/	-	-	A7SSR7	Predicted protein	-	-	both
NVE144	157790	1.5288	212.048	1.56213e-09	-	cDNA FLJ35660 fis, clone SPLEN2017538, highly similar to Dickkopf-related protein 3	-	A7RF27	Predicted protein		ENOG410VZUS	both
NVE5471	160868	1.54179	1570.19	1.37758e-19	Pou/Homeobox/	POU domain, class 4, transcription factor 3	POU domain protein	A7RNB5	POU domain protein	POU class 4 homeobox	ENOG410V8HY	both
NVE16862	232363	1.61818	163.93	2.25635e-12	-	-	-	A7RWN1	Predicted protein	-	-	gene_body
NVE3844	232014	1.63125	2217.96	3.40766e-14	Collagen/Collagen/Gal_Lectin/	cDNA FLJ56989, highly similar to Macrophage receptor MARCO	CG42342	A7RMJ6	Predicted protein	Galactose binding lectin domain	ENOG410VS2B	both
NVE856	244014	1.63871	135.564	1.35582e-12	-	-	-	A7SAR1	Predicted protein	-	-	gene_body
NVE17360	163734	1.66092	153.057	3.09756e-12	Tubulin/Tubulin_C/	Tubulin beta-3 chain	Beta-Tubulin at 97EF	A7RX70	Predicted protein	-	-	both
NVE6557	213382	1.67553	1168.48	3.22182e-15	-	-	-	NVE6557	-	-		gene_body
NVE3845	232015	1.68453	2300.09	1.79529e-13	Collagen/Collagen/Gal_Lectin/	Collagen alpha-4(IV) chain	Multiplexin	A7RMJ7	Predicted protein	Galactose binding lectin domain	ENOG410VRV3	gene_body
NVE900	111441	1.6875	2956.67	2.21075e-09	-	Putative p150	AT16518p	A7SAU4	Predicted protein (Fragment)	Inherit from KOG: Retrotransposon protein	ENOG410W1BF	gene_body
NVE25277	84193	1.69631	110.36	1.64167e-15	EF-hand_7/	Transmembrane prolyl 4-hydroxylase	IP03859p	A7RK77	Predicted protein (Fragment)	Prolyl 4-hydroxylase, transmembrane (Endoplasmic reticulum)	ENOG410V843	both
NVE22462	238654	1.69705	1761.21	4.51875e-11	ShK/ShK/ShK/	-	-	A7RJ12	Predicted protein	-	-	gene_body
NVE22154	No data	1.70002	519.648	3.16965e-09	ShK/	-	-	NVE22154	-	-		both
NVE16303	81344	1.7931	218.55	1.63114e-17	zf-C2H2_6/zf-H2C2_2/zf-H2C2_2/zf-H2C2_2/zf-H2C2_2/zf-H2C2_2/	Putative zinc finger protein 724	LD26873p	A7RGU6	Predicted protein (Fragment)	Zinc finger protein	ENOG410VJAU	gene_body
NVE9231	72011	1.82905	493.164	6.17464e-25	GON/	-	-	NVE9231	-	-		both
NVE5210	212516	1.83791	109.219	5.66008e-18	-	Transmembrane prolyl 4-hydroxylase	RE70601p	A7SHV8	Predicted protein	-	-	both
NVE1559	112522	1.85269	279.593	5.41757e-17	Peptidase_S8/P_proprotein/	Proprotein convertase subtilisin/kexin type 1	Furin 1	A7SBU1	Predicted protein (Fragment)	Proprotein convertase P-domain	ENOG410VR9U	both
NVE11707	240295	1.88845	241.209	1.54416e-16	WAP/	-	-	A7RS00	Predicted protein	WAP	ENOG410VWN5	gene_body
NVE9739	No data	1.92248	23.8144	4.94451e-08	-	-	-	NVE9739	-	-		both
NVE16877	241205	1.93581	116.054	8.0206e-15	-	-	-	A7RWP2	Predicted protein	-	-	both
NVE19039	238391	1.94322	1198.67	4.77068e-10	-	-	-	A7RHW9	Predicted protein	-	-	both
NVE19039	238391	1.94322	1198.67	4.77068e-10	-	-	-	A7RHW9	Predicted protein	-	-	both
NVE17870	241440	1.94624	217.204	1.95589e-11	-	-	-	A7RXW2	Predicted protein	-	-	gene_body
NVE2100	85822	1.98626	786.813	8.21614e-22	Thioredoxin_7/	Thioredoxin domain-containing protein 12	-	A7RLG7	Predicted protein	-	-	gene_body
NVE5728	245503	2.17496	341.02	5.91571e-13	VWA/	Collagen alpha-1(XII) chain	-	A7SIL2	Predicted protein	-	-	gene_body
NVE25937	No data	2.19939	22.808	5.19663e-07	-	-	-	NVE25937	-	-		both
NVE22463	238655	2.33976	2948.53	8.25377e-25	ShK/ShK/ShK/	Neurofilament heavy polypeptide	Mucin 55B	A7RJ13	Predicted protein	-	-	gene_body
NVE3643	No data	2.46933	703.622	1.75911e-29	-	-	-	NVE3643	-	-		both
NVE9725	125997	2.66362	895.437	3.34886e-49	FKBP_C/EF-hand_7/	FK506 binding protein 14, 22 kDa	FK506-binding protein 14 ortholog	A7SPD7	Predicted protein (Fragment)	FK506 binding protein 14, 22 kDa	ENOG410V9SB	promoter_region
NVE252	237832	2.73475	259.59	2.7679e-25	Gal_Lectin/Gal_Lectin/Gal_Lectin/Gal_Lectin/	Protein eva-1 homolog C	Calcium-independent receptor for alpha-latrotoxin	A7RFD2	Predicted protein	Galactose binding lectin domain	ENOG410WH47	gene_body
NVE20329	4663	3.00696	356.355	5.02091e-30	-	-	-	A7S0Y6	Predicted protein (Fragment)	-	-	both
NVE3842	239381	3.47379	320.83	3.10586e-30	-	-	-	A7RMJ4	Predicted protein	-	-	gene_body

## Sheet: c102
gene	JGI_ID	fold change in POU4 mutants relative to siblings	mean_counts	pvalue	Pfam.architecture	Hsap.BBH	Dmel.BBH	Uniprot.ID	Uniprot.description	EggNOG.description	EggNOG.ID	ChIP.seq.mark.location
NVE1494	No data	-4.45306	189.317	5.67124e-44	-	-	-	NVE1494	-	-		both
NVE10252	127428	-4.45017	259.207	2.00005e-51	-	-	-	A7SQC3	Predicted protein (Fragment)	-	-	promoter_region
NVE3484	211311	-3.3811	4.32656	0.000260301	OAS1_C/	2'-5'-oligoadenylate synthase 1	-	211311	-	-		both
NVE4205	211784	-2.86242	77.8235	1.84737e-22	C2/	Multiple C2 and transmembrane domain-containing protein 1	IP11216p	A7SG61	Predicted protein (Fragment)	Inherit from KOG: Multiple C2 domains, transmembrane	ENOG410VDSE	both
NVE47	237717	-2.57972	1591.94	3.94361e-60	ATP-grasp_4/	-	-	A7RET6	Predicted protein	-	-	gene_body
NVE2514	114289	-2.55982	110.305	1.07286e-29	Usp/	-	-	A7SDJ5	Predicted protein	Universal stress protein	ENOG410VWEC	both
NVE3072	199202	-2.48942	52.2802	6.09456e-19	7tm_1/	cDNA FLJ57069, highly similar to C-C chemokine receptor type 11	CG18208	A7RM98	Predicted protein	-	-	both
NVE12661	131398	-2.45228	9.26195	2.33134e-05	Gal_Lectin/Gal_Lectin/Gal_Lectin/	Protein eva-1 homolog C	MIP03045p	A7STP1	Predicted protein (Fragment)	eva-1 homolog C (C. elegans)	ENOG410V4CW	both
NVE10898	240186	-2.43141	509.359	7.75268e-36	EF-hand_7/EF-hand_6/EF-hand_6/EF-hand_5/	Calretinin	Calbindin 53E	A7RRJ6	Predicted protein	Calbindin	ENOG410V5VF	gene_body
NVE4689	199475	-2.10886	11.0926	0.000112475	zf-C3HC4/zf-B_box/Filamin/NHL/NHL/NHL/	E3 ubiquitin-protein ligase TRIM71	Thin	A7RMW4	Predicted protein	-	-	both
NVE4655	No data	-1.96239	75.2328	2.00066e-11	-	-	-	NVE4655	-	-		both
NVE18817	139887	-1.94733	128.158	1.07118e-22	EF-hand_7/EF-hand_7/	Calmodulin	AT15141p	A7T044	Predicted protein (Fragment)	-	-	both
NVE12662	131398	-1.85375	6.92769	0.000784696	Gal_Lectin/Gal_Lectin/Gal_Lectin/	Protein eva-1 homolog C	MIP03045p	A7STP1	Predicted protein (Fragment)	eva-1 homolog C (C. elegans)	ENOG410V4CW	both
NVE19980	24362	-1.6503	55.2769	3.12628e-11	FA_desaturase/	Stearoyl-CoA desaturase 5	Fatty acid desaturase	NVE19980	-	-		gene_body
NVE1276	No data	-1.57423	241.678	4.46616e-10	-	-	-	NVE1276	-	-		both
NVE19361	98897	-1.48673	157.032	5.63199e-14	Neur_chan_LBD/Neur_chan_memb/	Gamma-aminobutyric acid receptor subunit beta-2	Gamma-aminobutyric acid receptor subunit beta-like	A7RZH4	Predicted protein (Fragment)	-	-	both
NVE426	110350	-1.44739	74.2102	8.09826e-08	HMG_box/	Transcription factor SOX-3	Sox21b	A7S9V3	Predicted protein (Fragment)	HMG (high mobility group) box	ENOG410WGTS	both
NVE18010	241459	-1.4043	21.6371	0.000102555	Usp/	-	-	A7RY00	Predicted protein	-	-	gene_body
NVE11870	129955	-1.32497	119.877	1.62774e-09	-	-	-	A7SSI0	Predicted protein (Fragment)	-	-	both
NVE8353	No data	-1.28484	255.09	1.57004e-17	Ank_2/Ank_2/Ank_2/Ank/Ank_2/Ank_2/Ank/Ank_4/Ank_2/Ank_2/Ank/	Ankyrin-2	Ankyrin 2	NVE8353	-	-		both
NVE22513	83526	-1.27406	86.6218	7.3939e-06	EF-hand_8/EF-hand_6/	Calmodulin	Calmodulin	A7RJ55	Predicted protein (Fragment)	-	-	gene_body
NVE14207	202189	-1.2151	30.9467	0.00020935	EGF_CA/EGF_CA/	Fibrillin-2	Dumpy	A7RU36	Predicted protein	-	-	both
NVE10999	216224	-1.21486	109.671	4.99884e-09	Neur_chan_memb/	Acetylcholine receptor subunit beta	Nicotinic acetylcholine receptor alpha 3 subunit	A7SRB4	Predicted protein (Fragment)	-	-	both
NVE1605	244207	-1.16142	594.994	6.78208e-07	Anoctamin/	Anoctamin-8	Anoctamin	A7SBX8	Anoctamin	Anoctamin	ENOG410V6GT	gene_body
NVE11748	91324	-1.14716	1695.25	1.60577e-07	C2/C2/C2/PRT_C/	Multiple C2 and transmembrane domain-containing protein 1	Multiple C2 domain and transmembrane region protein	A7RS41	Predicted protein (Fragment)	Multiple C2 domains, transmembrane	ENOG410WDIC	both
NVE9613	237402	-1.11905	30.5587	0.000229003	Acetyltransf_1/	Diamine acetyltransferase 2	CG4210	A7SP54	Predicted protein (Fragment)	-	-	both
NVE17822	53909	-1.10241	8.6875	0.0041733	Neur_chan_memb/	cDNA FLJ52443, highly similar to Glycine receptor alpha-2 chain	Gamma-aminobutyric acid receptor subunit beta-like	A7RXS6	Predicted protein (Fragment)	-	-	both
NVE13502	201851	-1.08519	71.2132	1.46397e-07	PID_2/	cDNA FLJ14335 fis, clone PLACE4000411, highly similar to Homo sapiens mRNA; cDNA DKFZp586D0624 (from clone DKFZp586D0624)	GH04568p	A7RTC9	Predicted protein	-	-	both
NVE19127	197466	-1.0657	59.8756	9.40529e-05	Cadherin/Cadherin/Cadherin/Cadherin/Cadherin/Cadherin/Cadherin/Cadherin/Cadherin/Cadherin/Cadherin/Cadherin/Cadherin/Cadherin/Cadherin/Cadherin/Cadherin/Cadherin/Cadherin/Cadherin/Cadherin/Cadherin/Cadherin/Laminin_G_1/Laminin_G_2/	Protocadherin Fat 3	Fat-like cadherin-related tumor suppressor homolog	A7RI52	Predicted protein	Cadherins are calcium dependent cell adhesion proteins (By similarity)	ENOG410V5G3	gene_body
NVE18050	203853	-1.04062	82.5791	1.19886e-07	DUF885/	-	-	A7RY40	Predicted protein	Bacterial protein of unknown function (DUF885)	ENOG410VRFN	both
NVE9425	200525	-0.989887	302.667	1.1692e-07	Tubulin/Tubulin_C/	Tubulin alpha-1A chain	Tubulin alpha-1 chain	A7RQB6	Predicted protein	-	-	gene_body
NVE12063	130406	-0.912237	73.9607	2.43139e-06	Ion_trans_2/Ion_trans_2/	Potassium channel, subfamily K, member 9	Acid-sensitive two pore domain K+ channel dTASK-7	A7SSX6	Predicted protein (Fragment)	Potassium channel subfamily K member	ENOG410V54X	both
NVE19182	204357	-0.856188	425.24	9.83101e-08	fn3/SEA/fn3/fn3/SEA/fn3/fn3/fn3/fn3/fn3/fn3/fn3/fn3/	Protein sidekick-2	RT02073p	A7RZ85	Predicted protein	sidekick cell adhesion molecule 2	ENOG410WH7P	both
NVE4945	189854	-0.844718	152.955	3.90002e-07	BTB_2/Ion_trans/	Potassium voltage-gated channel subfamily A member 2	Potassium voltage-gated channel protein Shaker	A7SHB6	Predicted protein (Fragment)	potassium voltage-gated channel shaker-related subfamily member	ENOG410V5JH	gene_body
NVE19959	204856	-0.802224	32.5605	0.00190434	14-3-3/14-3-3/	14-3-3 protein zeta/delta	14-3-3zeta	A7S0E3	Predicted protein	-	-	gene_body
NVE13277	10122	-0.730436	994.19	1.14452e-06	Ion_trans_2/BK_channel_a/	Potassium channel subfamily T member 1	IP14110p	A7SU69	Predicted protein (Fragment)	potassium channel, subfamily T, member	ENOG410V8YS	both
NVE7348	45	-0.720997	762.518	1.82425e-07	Ion_trans/Ion_trans/Na_trans_assoc/Ion_trans/	Sodium channel protein type 10 subunit alpha	Sodium channel protein	NVE7348	-	-		gene_body
NVE12924	196786	-0.680087	693.815	6.24655e-06	Ion_trans_2/	Potassium voltage-gated channel subfamily F member 1	Potassium voltage-gated channel protein Shab	A7RGD8	Predicted protein	Ligand-gated ion channel	ENOG410VPU5	both
NVE24403	207612	-0.670829	271.172	0.000115403	Ig_2/	cDNA FLJ54289, highly similar to Neural cell adhesion molecule 2	CG34353	A7S6L5	Predicted protein	-	-	both
NVE12981	158359	-0.657294	411.922	1.62049e-06	WD40/WD40/WD40/WD40/WD40/WD40/WD40/WD40/	WD repeat-containing protein 86	F-box/WD repeat-containing protein 7	A7RGK1	Predicted protein	WD repeat domain 86	ENOG410WH3C	both
NVE2500	114299	-0.656725	193.4	3.01171e-05	EF-hand_like/PI-PLC-X/PI-PLC-Y/C2/	1-phosphatidylinositol 4,5-bisphosphate phosphodiesterase delta-4	Phosphoinositide phospholipase C	A7SDH9	Phosphoinositide phospholipase C (EC 3.1.4.11) (Fragment)	phospholipase C	ENOG410V5XZ	both
NVE265	No data	-0.644949	312.282	0.000816895	-	-	-	NVE265	-	-		both
NVE11189	ENSRNA022755290	-0.581703	89.4214	0.000720141	-	-	-	NVE11189	-	-		both
NVE13208	131788	-0.578777	130.82	0.000873772	AbfB/	-	-	NVE13208	-	-		gene_body
NVE7055	213684	-0.569997	325.392	1.56057e-06	Ion_trans_2/	Potassium voltage-gated channel subfamily G member 2	Shaw-like	A7SKI2	Predicted protein	-	-	both
NVE2179	198924	-0.494285	191.121	0.00224862	F5_F8_type_C/Lectin_C/Lectin_C/	Brevican isoform 1 variant	-	A7RLP1	Predicted protein	Lectin C-type domain	ENOG410VTQ7	both
NVE26093	208887	-0.485473	143.826	0.00148415	Peptidase_M13_N/Peptidase_M13/	Endothelin converting enzyme 1	RE48040p	A7S9L3	Predicted protein	-	-	both
NVE4432	189628	-0.48489	1161.64	0.00129143	E1_dh/Transket_pyr/	2-oxoglutarate dehydrogenase, mitochondrial	Neural conserved at 73EF	A7SGK7	Predicted protein	Dehydrogenase	ENOG410V5U3	gene_body
NVE20107	242002	-0.478363	549.547	0.000178417	EF-hand_8/EF-hand_7/	Kv channel interacting protein 3, calsenilin	CG5890	A7S0J9	Predicted protein	Kv channel interacting protein	ENOG410V73Z	gene_body
NVE2456	No data	-0.454651	563.085	0.000778832	-	-	-	NVE2456	-	-		both
NVE20352	100237	-0.449747	393.095	0.00216893	zf-C3HC4_3/	E3 ubiquitin-protein ligase MYLIP	Defense repressor 1	NVE20352	-	-		both
NVE14851	No data	-0.442744	58.0644	0.00612092	Usp/	-	-	NVE14851	-	-		both
NVE6699	21645	-0.438536	470.138	0.000246616	BTB_2/Ion_trans/	Potassium voltage-gated channel subfamily A member 4	Potassium voltage-gated channel protein Shaker	A7SK44	Predicted protein (Fragment)	-	-	both
NVE1571	209875	-0.429644	165.156	0.00457158	Ion_trans_2/	Potassium voltage-gated channel subfamily B member 2	Potassium voltage-gated channel protein Shab	A7SBV4	Predicted protein	-	-	both
NVE9906	200670	-0.409374	252.465	0.00151605	LEM/	cDNA FLJ56676, highly similar to Inner nuclear membrane protein Man1	-	A7RQP3	Predicted protein	-	-	both
NVE14933	234521	-0.408721	525.7	0.0099691	Tubulin/Tubulin_C/	Tubulin alpha-1C chain	Tubulin alpha-1 chain	A7RUX0	Predicted protein	-	-	both
NVE3646	230093	-0.400993	187.908	0.0025221	Neur_chan_LBD/Neur_chan_memb/	Gamma-aminobutyric acid A receptor beta 3 isoform A	Gamma-aminobutyric acid receptor subunit beta-like	A7SFG6	Predicted protein	Gamma-aminobutyric acid (GABA) A receptor	ENOG410V71Z	gene_body
NVE7792	24063	-0.392171	658.086	0.00121251	KAP_NTPase/	cDNA FLJ61245, highly similar to Homo sapiens kinase D-interacting substance of 220 kDa (KIDINS220), mRNA	SD10882p	A7SLT1	Predicted protein (Fragment)	kinase D-interacting substrate	ENOG410V86U	both
NVE24215	106212	-0.379141	268.569	0.00177354	MBOAT/	Lysophospholipid acyltransferase 2	Oysgedart	A7S6B5	Predicted protein (Fragment)	membrane bound O-acyltransferase domain containing	ENOG410V55W	both
NVE14201	234494	-0.370921	22793.3	0.00683026	Actin/	Actin, cytoplasmic 2	Actin 5C	A7RU31	Predicted protein	Actins are highly conserved proteins that are involved in various types of cell motility and are ubiquitously expressed in all eukaryotic cells	ENOG410V4CV	both
NVE10097	126489	-0.352817	609.775	0.0079834	SH3_9/SH3_2/	Peripheral-type benzodiazepine receptor-associated protein 1	RIM-binding protein	A7SPX6	Predicted protein (Fragment)	-	-	gene_body
NVE20937	238488	-0.334455	152.748	0.00923392	-	-	-	A7RIB9	Predicted protein	-	-	both
NVE18474	98014	-0.323625	262.909	0.00781183	Cadherin/Cadherin/Cadherin/	Protocadherin Fat 1	Fat-like cadherin-related tumor suppressor homolog	A7RYP6	Predicted protein (Fragment)	-	-	gene_body
NVE24708	243313	-0.311329	443.541	0.00692671	DUF1151/	-	-	A7S743	Predicted protein	-	-	both
NVE6218	30743	-0.28401	303.996	0.00668874	LRR_8/LRR_8/LRR_8/LRR_4/LRR_8/	Leucine-rich repeat-containing protein 7	FI23606p1	A7RNR2	Predicted protein (Fragment)	leucine rich repeat containing	ENOG410WCG7	gene_body
NVE24544	243274	-0.273953	592.385	0.00710145	-	-	-	A7S6V1	Predicted protein	-	-	gene_body
NVE19	79108	-0.225532	847.959	0.00960353	RRM_1/	HCG2043421	Protein couch potato	A7REQ1	Predicted protein (Fragment)	RNA binding protein with multiple splicing 2	ENOG410VCBR	gene_body
NVE18135	No data	0.661012	54.9378	0.00143446	-	-	-	NVE18135	-	-		both
NVE16780	248060	0.757003	631.784	2.97677e-06	C1_1/	-	GM13116p	A7SY99	Predicted protein		ENOG410W2QQ	both
NVE17479	233740	1.10804	550.281	1.25699e-07	-	-	-	A7SYZ5	Predicted protein	-	-	gene_body
NVE25285	238889	1.4924	73.5795	7.21699e-08	Laminin_G_3/	-	-	A7RK85	Predicted protein	-	-	both
NVE5471	160868	1.54179	1570.19	1.37758e-19	Pou/Homeobox/	POU domain, class 4, transcription factor 3	POU domain protein	A7RNB5	POU domain protein	POU class 4 homeobox	ENOG410V8HY	both
NVE22462	238654	1.69705	1761.21	4.51875e-11	ShK/ShK/ShK/	-	-	A7RJ12	Predicted protein	-	-	gene_body
NVE3643	No data	2.46933	703.622	1.75911e-29	-	-	-	NVE3643	-	-		both
NVE15733	136624	2.52118	654.103	2.85825e-25	-	-	-	A7SXD6	Predicted protein (Fragment)	-	-	both
NVE3842	239381	3.47379	320.83	3.10586e-30	-	-	-	A7RMJ4	Predicted protein	-	-	gene_body
