# Supplementary material for: Cnidarian hair cell development illuminates an ancient role for the class IV POU transcription factor in defining mechanoreceptor identity
Source: eLife. 2021 Dec 23;10:e74336. doi: 10.7554/eLife.74336 (PMC8846589; doi:10.7554/eLife.74336)
Supplement: Supplementary file 14. [file elife-74336-supp14.xlsx]

## Sheet: Sheet1
	Total umis	Niche umos	niche.umi.fraction(%)	log2FC	Pfam.architecture	Hsap.BBH	Dmel.BBH	Uniprot.ID	Uniprot.description	EggNOG.description	EggNOG.ID
v1g30968	529	16	3.02457	1.32396	7tm_1/	Melanocortin receptor 5	Octopamine beta1 receptor	A7RKC7	Predicted protein (Fragment)	-	-
v1g97288	163	16	9.81595	1.16642	7tm_1/	Adrenoceptor beta 2 surface isoform A	Octopamine beta1 receptor	A7RXY4	Predicted protein (Fragment)	-	-
v1g210501	706	19	2.69122	1.1452	7tm_1/	Tachykinin receptor 2 variant	Tachykinin-like peptides receptor 86C	A7SDA6	Predicted protein	7 transmembrane receptor (rhodopsin family)	ENOG410W2N2
v1g198014	190	10	5.26316	1.1067	7tm_1/	Neuropeptide FF receptor 2	FI19465p1	A7RJG8	Predicted protein	-	-
v1g41807	183	11	6.01093	1.10347	7tm_1/	Orexin receptor type 1	Leucokinin receptor	A7RR60	Predicted protein (Fragment)	-	-
v1g52016	134	10	7.46269	1.07274	7tm_1/	Hypocretin receptor-2	Leucokinin receptor	A7S8M6	Predicted protein (Fragment)	somatostatin receptor	ENOG410V655
v1g54070	237	9	3.79747	1.07274	7tm_1/	Neuropeptide FF receptor 2	RYamide receptor	A7S5Z6	Predicted protein (Fragment)	-	-
