# Supplementary material for: Cnidarian hair cell development illuminates an ancient role for the class IV POU transcription factor in defining mechanoreceptor identity
Source: eLife. 2021 Dec 23;10:e74336. doi: 10.7554/eLife.74336 (PMC8846589; doi:10.7554/eLife.74336)
Supplement: Supplementary file 15. [file elife-74336-supp15.xlsx]

## Sheet: Sheet1
	Forward primer	Reverse primer
3' RACE	GAGCAGCAAGAGGCGTTTCGGTTGGAC	Universal Primer Mix (Takara)
RTPCR	AGGGACCATCTTGGCAAGAGCAGCTCAC	GGAGGCTACACAAGTCACGAATGCTGTC
RTPCR	GCCGACCGACATCCTGGGATATGAGTGG	AACAGCATAGCGGGATCTGGCAGGCTG
RTPCR	GCGCATGTATGAAACAACTGGTCGCAGG	TGTGCGACTCGAAGAGCTGAGGTCTAGG
RTPCR	TTCATCAATGAAAGCTGGCTGGCCGTGG	TGGCTATGCCTTGCTTCTGAACTGGTGG
